# Supplementary material
Source: PubMed Central journal article supplement (PMC2224196)
Supplement: pnas_0710735105_8.pdf [file pnas_0710735105_8.pdf]

**Table 3. Hypermethylated regions on chromosome 8p in lung squamous cell carcinoma**

| Lung squamous cell carcinoma #1 |                         |             |                     |
|---------------------------------|-------------------------|-------------|---------------------|
| Stage I                         |                         |             |                     |
|                                 | Genome location         | Gene symbol | CpG type / location |
| 1                               | Chr8:4835989-4837638    | CSMD1       | CGI (promoter)      |
| 2                               | Chr8:11575055-11576776  | GATA4       | CGI (promoter)      |
| 3                               | Chr8:18288238-18289521  | NAT2        | CGI (promoter)      |
| 4                               | Chr8:21960744-21961726  | FGF17       | CGI (intragenic)    |
| 5                               | Chr8:22051937-22053186  | REEP4       | CGr (intragenic)    |
| 6                               | Chr8:22494950-22495299  | PDLIM2      | CGr (intragenic)    |
| 7                               | Chr8:24827148-24828797  | NEFM        | CGI (promoter)      |
| 8                               | Chr8:24868516-24869816  | NEFL        | CGI (promoter)      |
| 9                               | Chr8:25956098-25958848  | EBF2        | CGI (promoter)      |
| 10                              | Chr8:25960960-25962060  | EBF2        | CGI (promoter)      |
| 11                              | Chr8:26777671-26,779237 | ADRA1       | CGI (promoter)      |
| 12                              | Chr8:26192344-26193593  | PPP2R2A     | CGr (intragenic)    |
| 13                              | Chr8:35211737-35213286  | UNC5D       | CGI (promoter)      |
| 14                              | Chr8:36763459-36764208  | BC0287701   | CGr (intragenic)    |
| 15                              | Chr8:37677117-37678992  | ZNF703      | CGI (intragenic)    |
| 16                              | Chr8:41543396-41545120  | N/A         | CGI (Intergenic)    |

| Lung squamous cell carcinoma #2 |                        |           |                     |
|---------------------------------|------------------------|-----------|---------------------|
| Stage II                        |                        |           |                     |
|                                 | Genome location        | Gene      | CpG type / location |
| 1                               | Chr8:615015-616864     | ERICH1    | CGI (promoter)      |
| 2                               | Chr8:4759834-4761320   | CSMD1     | CGr (intragenic)    |
| 3                               | Chr8:4836289-4840074   | CSMD1     | CGI (promoter)      |
| 4                               | Chr8:6217346-6219095   | N/A       | CGr (intergenic)    |
| 5                               | Chr8:9797852-9801858   | N/A       | CGI (intergenic)    |
| 6                               | Chr8:11574306-11576776 | GATA4     | CGI (promoter)      |
| 7                               | Chr8:13033732-13034981 | DLC1      | CGI (promoter)      |
| 8                               | Chr8:17702544-17703493 | MTUS1     | CGI (promoter)      |
| 9                               | Chr8:21599811-21601928 | GFRA2     | CGr (intragenic)    |
| 10                              | Chr8:23617955-23620733 | N/A       | CGI (intergenic)    |
| 11                              | Chr8:26777279-26779628 | ADRA1     | CGI (promoter)      |
| 12                              | Chr8:28613835-28615841 | EXTL3     | CGI (promoter)      |
| 13                              | Chr8:30787832-30790084 | PPP2CB    | CGI (promoter)      |
| 14                              | Chr8:35211937-35214616 | UNC5D     | CGI (promoter)      |
| 15                              | Chr8:37672180-37676766 | ZNF703    | CGI (intragenic)    |
| 16                              | Chr8:37875678-37876368 | RAB11FIP1 | CGI (promoter)      |
| 17                              | Chr8:38876610-38878801 | AF286164  | CGI (promoter)      |
| 18                              | Chr8:40873947-40874696 | ZMAT4     | CGI (promoter)      |
| 19                              | Chr8:43114818-43115585 | FLJ3273   | CGI (promoter)      |

| Lung squamous cell carcinoma #3 |                        |          |                     |
|---------------------------------|------------------------|----------|---------------------|
| Stage III                       |                        |          |                     |
|                                 | Genome location        | Gene     | CpG type / location |
| 1                               | Chr8:830303-831152     | BC08783  | CGr (intragenic)    |
| 2                               | Chr8:1832535-1834184   | ARHGEF10 | CGr (intragenic)    |
| 3                               | Chr8:4838851-4840074   | CSMD1    | CGI (promoter)      |
| 4                               | Chr8:6217446-6219095   | N/A      | CGr (intergenic)    |
| 5                               | Chr8:9799604-9800153   | SWAW     | CGI (promoter)      |
| 6                               | Chr8:11599647-11600696 | GATA4    | CGI (promoter)      |
| 7                               | Chr8:17148431-17149203 | VPS37A   | CGI (promoter)      |
| 8                               | Chr8:17445124-17445673 | SLC7A2   | CGI (intergenic)    |
| 9                               | Chr8:17702944-17703593 | MTUS1    | CGI (promoter)      |
| 10                              | Chr8:21701275-21702424 | GFRA2    | CGI (promoter)      |
| 11                              | Chr8:23617855-23620730 | N/A      | CGI (intergenic)    |
| 12                              | Chr8:25955098-25957047 | EBF2     | CGI (intragenic)    |
| 13                              | Chr8:26777379-26778628 | ADRA1    | CGI (promoter)      |
| 14                              | Chr8:40719785-40720934 | ZMAT4    | CGr (intragenic)    |
| 15                              | Chr8:41284732-41285332 | SFRP1    | CGI (promoter)      |
| 16                              | Chr8:41743716-41744508 | ANK1     | CGI (intragenic)    |
| 17                              | Chr8:43114818-43115685 | FLJ32731 | CGI (promoter)      |

The definition of a CpG island was according to the UCSC genome browser: GC content of 50% or greater, length more than 200 bp, and a ratio  $>0.6$  of observed number of CpG dinucleotides to the expected number on the basis of the number of Gs and Cs in the segment. CpG-rich regions have a ratio of observed/expected CpGs of 0.3-0.6.  
Promoter, overlapping any first exon/transcription start site (TSS) of a gene.  
Intragenic, from TSS to the end of the gene boundary excluding those overlapping with first exon/TSS.  
Intergenic; located between genes.  
CGI, CpG island; CGr, CpG-rich region.
