# Supplementary material
Source: PubMed Central journal article supplement (PMC2224196)
Supplement: pnas_0710735105_9.pdf [file pnas_0710735105_9.pdf]

**Table 4. List of CpG islands hypermethylated in stage I SCCs**

| HG18 Coordinates |          |          | Positive in tumor |   |   |   |   | Total no. positive | Location relative to known genes* |          |            |            |
|------------------|----------|----------|-------------------|---|---|---|---|--------------------|-----------------------------------|----------|------------|------------|
| Chr              | Start    | End      | 1                 | 2 | 3 | 4 | 5 |                    | Upstream                          | Promoter | Intragenic | Downstream |
| chr1             | 1099178  | 1100008  |                   |   |   | + |   | 1                  |                                   | TLL10    |            |            |
| chr1             | 11483954 | 11484743 | +                 |   |   | + |   | 2                  |                                   |          |            |            |
| chr1             | 13782194 | 13782429 |                   |   | + |   |   | 1                  | PDPN                              |          |            |            |
| chr1             | 16036340 | 16036710 | +                 | + | + | + |   | 4                  |                                   |          |            |            |
| chr1             | 16924079 | 16924478 | +                 |   |   |   |   | 1                  |                                   |          |            |            |
| chr1             | 18839839 | 18840706 |                   |   |   | + |   | 1                  |                                   |          | PAX7       |            |
| chr1             | 18844317 | 18844684 |                   | + |   | + |   | 2                  |                                   |          | PAX7       |            |
| chr1             | 35815020 | 35816031 | +                 | + |   |   |   | 2                  |                                   |          | TFAP2E     |            |
| chr1             | 37556199 | 37556845 |                   |   |   | + |   | 1                  |                                   |          |            |            |
| chr1             | 40371096 | 40371796 |                   |   |   | + |   | 1                  |                                   |          |            |            |
| chr1             | 47672249 | 47672972 | +                 |   |   |   |   | 1                  | FOXD2                             |          |            |            |
| chr1             | 47682300 | 47683607 | +                 | + | + | + | + | 5                  |                                   |          |            | FOXD2      |
| chr1             | 50286232 | 50286907 | +                 |   |   |   |   | 1                  |                                   |          |            |            |
| chr1             | 50654472 | 50654690 | +                 |   |   | + |   | 2                  |                                   |          |            |            |
| chr1             | 50656816 | 50664059 | +                 |   | + |   |   | 2                  |                                   |          |            |            |
| chr1             | 54594579 | 54594921 |                   |   | + |   |   | 1                  |                                   |          | SSBP3      |            |
| chr1             | 57660552 | 57663225 |                   |   |   | + |   | 1                  |                                   |          | DAB1       |            |
| chr1             | 63554983 | 63563059 | +                 | + | + | + | + | 5                  |                                   |          | FOXD3      |            |
| chr1             | 63567952 | 63568728 |                   |   | + | + |   | 2                  |                                   |          |            | FOXD3      |
| chr1             | 65504000 | 65504437 | +                 |   | + |   |   | 2                  |                                   |          | DNAJC6     |            |
| chr1             | 71284813 | 71286392 |                   |   |   | + |   | 1                  |                                   | PTGER3   |            |            |
| chr1             | 75368402 | 75368750 | +                 |   | + | + |   | 3                  |                                   |          | LHX8       |            |
| chr1             | 75373263 | 75374003 |                   |   |   | + |   | 1                  |                                   |          | LHX8       |            |
| chr1             | 78729213 | 78730104 |                   |   |   | + | + | 2                  |                                   | PTGFR    |            |            |
| chr1             | 79244870 | 79245125 | +                 |   | + | + | + | 4                  |                                   |          |            |            |
| chr1             | 85236473 | 85236755 |                   |   |   |   | + | 1                  | MCOLN2                            |          |            |            |
| chr1             | 85854289 | 85854656 |                   |   |   | + |   | 1                  |                                   |          |            |            |
| chr1             | 87390281 | 87390574 |                   |   |   | + | + | 2                  |                                   |          |            |            |
| chr1             | 88700872 | 88701348 |                   |   | + |   |   | 1                  |                                   |          |            |            |
| chr1             | 90955098 | 90955445 | +                 | + | + | + | + | 5                  |                                   | BARHL2   |            |            |
| chr1             | 90955734 | 90957128 | +                 |   | + | + |   | 3                  | BARHL2                            |          |            |            |

|      |           |           |   |   |   |   |   |  |   |         |        |        |         |
|------|-----------|-----------|---|---|---|---|---|--|---|---------|--------|--------|---------|
| chr1 | 90961728  | 90961988  |   |   | + | + |   |  | 2 | BARHL2  |        |        |         |
| chr1 | 90963078  | 90965392  | + | + | + | + | + |  | 5 | BARHL2  |        |        |         |
| chr1 | 91073568  | 91074479  | + | + | + |   |   |  | 3 |         |        |        |         |
| chr1 | 92718496  | 92725197  |   |   | + |   | + |  | 2 |         | GFI1   |        |         |
| chr1 | 106424917 | 106425377 |   |   | + |   |   |  | 1 |         |        |        |         |
| chr1 | 110411789 | 110414826 | + | + | + | + | + |  | 5 |         |        | ALX3   |         |
| chr1 | 110428052 | 110429007 |   |   | + | + |   |  | 2 |         |        |        |         |
| chr1 | 113087856 | 113088695 |   |   | + |   | + |  | 2 |         |        |        |         |
| chr1 | 114498410 | 114498708 |   |   | + | + |   |  | 2 | SYT6    |        |        |         |
| chr1 | 115198972 | 115199465 |   |   | + |   |   |  | 1 |         | SYCP1  |        |         |
| chr1 | 116181883 | 116183887 |   | + | + |   |   |  | 2 |         |        | NHLH2  |         |
| chr1 | 116878566 | 116878822 |   |   | + |   |   |  | 1 |         |        | CD58   |         |
| chr1 | 119328306 | 119328715 | + | + | + | + |   |  | 4 |         |        | TBX15  |         |
| chr1 | 119331343 | 119332235 |   |   | + |   |   |  | 1 |         |        | TBX15  |         |
| chr1 | 119333515 | 119333719 | + | + | + | + |   |  | 4 |         | TBX15  |        |         |
| chr1 | 119337190 | 119337510 | + | + | + | + |   |  | 4 | TBX15   |        |        |         |
| chr1 | 119344580 | 119344977 | + | + |   | + | + |  | 4 |         |        |        |         |
| chr1 | 119350668 | 119352843 | + | + | + | + | + |  | 5 |         |        |        |         |
| chr1 | 120240537 | 120240743 | + |   | + | + |   |  | 3 |         | ADAM30 |        |         |
| chr1 | 144801705 | 144801928 |   |   | + |   |   |  | 1 |         |        |        |         |
| chr1 | 145018953 | 145019201 | + |   | + |   |   |  | 2 |         |        |        |         |
| chr1 | 146184781 | 146185539 |   |   | + | + |   |  | 2 |         |        |        |         |
| chr1 | 146241846 | 146242208 |   |   | + |   |   |  | 1 |         |        |        |         |
| chr1 | 146248691 | 146249097 | + |   |   | + |   |  | 2 |         |        |        |         |
| chr1 | 146292792 | 146293012 |   |   | + |   |   |  | 1 |         |        |        |         |
| chr1 | 147404167 | 147405023 | + |   |   | + |   |  | 2 |         |        |        |         |
| chr1 | 147422731 | 147423295 | + |   |   | + |   |  | 2 |         |        |        |         |
| chr1 | 149370310 | 149372724 | + |   | + |   |   |  | 2 |         |        | SEMA6C |         |
| chr1 | 150346622 | 150348329 | + | + |   |   |   |  | 2 |         |        |        |         |
| chr1 | 150427946 | 150428552 | + | + |   | + |   |  | 3 |         |        |        |         |
| chr1 | 154312968 | 154314008 | + | + | + |   |   |  | 3 |         |        | MEX3A  | RAB25   |
| chr1 | 154527824 | 154528049 | + |   |   |   |   |  | 1 |         |        | TMEM79 | C1orf85 |
| chr1 | 154671785 | 154672974 | + |   | + |   |   |  | 2 | C1orf61 |        |        |         |
| chr1 | 162812165 | 162812541 |   |   |   | + |   |  | 1 |         |        | PBX1   |         |
| chr1 | 163353381 | 163353650 |   |   |   | + |   |  | 1 |         |        |        |         |
| chr1 | 163471126 | 163472131 |   |   | + |   |   |  | 1 |         |        | LMX1A  |         |

|      |           |           |   |   |   |   |   |   |   |       |          |           |        |
|------|-----------|-----------|---|---|---|---|---|---|---|-------|----------|-----------|--------|
| chr1 | 163590111 | 163590435 | + |   | + | + |   |   | 3 |       |          | LMX1A     |        |
| chr1 | 163590816 | 163592952 |   |   | + |   |   |   | 1 |       | LMX1A    |           |        |
| chr1 | 165357200 | 165357634 |   | + |   |   |   |   | 1 |       |          | DUSP27    |        |
| chr1 | 167663246 | 167663493 | + |   |   | + | + |   | 3 |       | C1orf114 |           |        |
| chr1 | 171905286 | 171905668 |   |   | + |   |   |   | 1 |       | ANKRD45  |           |        |
| chr1 | 178464743 | 178471598 | + |   | + | + |   |   | 3 |       | LHX4     |           |        |
| chr1 | 179719330 | 179719696 |   |   | + |   |   |   | 1 |       | CACNA1E  |           |        |
| chr1 | 181652624 | 181654287 |   |   |   | + |   |   | 1 |       |          | NMNAT2    |        |
| chr1 | 182899847 | 182900286 | + |   |   |   |   |   | 1 |       |          |           |        |
| chr1 | 196153712 | 196154414 |   |   |   |   |   | + | 1 |       |          | LHX9      |        |
| chr1 | 196157102 | 196157447 | + | + | + |   |   |   | 3 |       |          | LHX9      |        |
| chr1 | 198271098 | 198271556 |   |   | + | + |   |   | 2 |       |          | NR5A2     |        |
| chr1 | 204085522 | 204085814 |   |   | + |   |   |   | 1 |       |          | FLJ32569  |        |
| chr1 | 206198951 | 206199740 | + |   | + |   |   |   | 2 |       |          |           |        |
| chr1 | 212225350 | 212225703 | + |   | + | + | + |   | 4 | PROX1 |          |           |        |
| chr1 | 212427231 | 212427588 |   |   |   | + |   |   | 1 |       |          |           |        |
| chr1 | 215374368 | 215375802 |   |   |   | + | + |   | 2 |       |          |           |        |
| chr1 | 215377373 | 215377801 | + |   |   | + |   |   | 2 |       |          |           |        |
| chr1 | 216164935 | 216165288 | + |   | + | + | + |   | 4 |       |          |           |        |
| chr1 | 216586911 | 216587129 |   |   |   |   |   | + | 1 |       |          | TGFB2     | RRP15  |
| chr1 | 217413733 | 217414195 | + |   |   |   |   |   | 1 |       | LYPLAL1  |           |        |
| chr1 | 219117072 | 219117487 |   |   |   | + |   |   | 1 | HLX1  |          |           |        |
| chr1 | 219122116 | 219122423 | + | + |   | + | + |   | 4 |       |          | HLX1      |        |
| chr1 | 219131513 | 219132223 | + |   | + |   |   |   | 2 |       |          |           | HLX1   |
| chr1 | 219134071 | 219134808 | + |   | + | + |   |   | 3 |       |          |           | HLX1   |
| chr1 | 222002966 | 222003667 | + |   |   |   |   |   | 1 |       |          | CAPN2     |        |
| chr1 | 222872032 | 222872476 |   |   | + |   |   |   | 1 |       |          | CNIH3     |        |
| chr1 | 223183844 | 223184404 |   |   |   | + |   |   | 1 |       |          |           |        |
| chr1 | 223931692 | 223931951 | + | + |   | + |   |   | 3 |       |          |           |        |
| chr1 | 226260720 | 226263135 | + |   |   |   |   |   | 1 |       | WNT3A    |           |        |
| chr1 | 226711820 | 226713057 |   |   | + |   |   |   | 1 |       | HIST3H2A | HIST3H2BB |        |
| chr1 | 227633830 | 227637307 | + |   |   | + |   |   | 2 |       | ACTA1    |           | NUP133 |
| chr1 | 237616732 | 237617962 |   |   |   | + |   |   | 1 |       |          |           |        |
| chr1 | 238227461 | 238228239 |   |   | + |   |   |   | 1 |       |          |           |        |
| chr1 | 241713018 | 241713511 |   | + |   |   |   |   | 1 |       |          | SDCCAG8   | AKT3   |
| chr1 | 242147164 | 242147716 |   |   | + |   |   |   | 1 |       |          |           |        |

|      |           |           |   |   |   |   |   |   |   |        |          |          |       |
|------|-----------|-----------|---|---|---|---|---|---|---|--------|----------|----------|-------|
| chr1 | 242161379 | 242161740 | + |   |   | + |   |   | 2 |        |          |          |       |
| chr1 | 245748023 | 245748574 |   |   |   | + | + |   | 2 |        |          |          |       |
| chr2 | 253401    | 255238    |   | + |   |   |   |   | 1 | SH3YL1 | ACP1     |          |       |
| chr2 | 457850    | 458659    | + |   |   |   |   |   | 1 |        |          |          |       |
| chr2 | 1523280   | 1523496   | + |   |   |   |   |   | 1 |        |          | TPO      |       |
| chr2 | 3620423   | 3620626   | + |   |   |   |   |   | 1 |        | COLEC11  |          |       |
| chr2 | 11842435  | 11842704  |   |   |   | + | + |   | 2 |        |          | LPIN1    |       |
| chr2 | 19415217  | 19415442  |   |   |   | + |   |   | 1 |        |          | OSR1     |       |
| chr2 | 19416639  | 19416913  |   |   |   | + |   |   | 1 |        |          | OSR1     |       |
| chr2 | 19419271  | 19421884  | + | + | + | + | + |   | 5 |        | OSR1     |          |       |
| chr2 | 19424445  | 19425131  | + | + | + | + | + |   | 4 | OSR1   |          |          |       |
| chr2 | 20733488  | 20734761  | + | + | + | + | + |   | 5 |        |          | GDF7     |       |
| chr2 | 24251150  | 24251698  | + | + | + | + | + |   | 5 |        | FLJ30851 |          |       |
| chr2 | 24251918  | 24252173  |   | + | + |   |   |   | 2 |        |          | FLJ30851 |       |
| chr2 | 25237444  | 25238267  | + | + |   |   |   |   | 2 |        |          | POMC     |       |
| chr2 | 25353268  | 25353933  |   |   |   | + |   |   | 1 |        |          | DNMT3A   |       |
| chr2 | 30307071  | 30309159  |   |   |   |   | + |   | 1 |        | LBH      |          |       |
| chr2 | 43181441  | 43181841  | + |   |   |   |   |   | 1 |        |          |          |       |
| chr2 | 45008700  | 45010553  |   |   |   | + | + |   | 2 |        |          |          |       |
| chr2 | 45013398  | 45013616  | + | + |   |   |   | + | 3 | SIX3   |          |          |       |
| chr2 | 45014932  | 45016562  |   | + |   |   |   |   | 1 | SIX3   |          |          |       |
| chr2 | 45032869  | 45033898  |   |   |   |   |   | + | 1 |        |          |          | SIX3  |
| chr2 | 45081149  | 45082287  | + | + |   |   |   | + | 3 |        |          |          | SIX2  |
| chr2 | 45084716  | 45084986  | + |   |   |   |   |   | 1 |        |          |          | SIX2  |
| chr2 | 45085286  | 45086054  | + | + |   |   |   | + | 3 |        |          | SIX2     |       |
| chr2 | 45249374  | 45251690  |   |   |   |   | + |   | 1 |        |          |          |       |
| chr2 | 50427550  | 50428321  |   |   |   | + |   | + | 2 |        |          | NRXN1    |       |
| chr2 | 63127980  | 63132934  |   |   |   | + | + | + | 3 |        | OTX1     |          | EHBP1 |
| chr2 | 63134539  | 63134851  | + | + | + | + | + | + | 5 |        |          | OTX1     | EHBP1 |
| chr2 | 66525936  | 66527140  | + | + | + | + | + | + | 5 |        |          | MEIS1    |       |
| chr2 | 66662073  | 66662908  | + | + | + | + | + | + | 5 |        |          |          | MEIS1 |
| chr2 | 70029354  | 70029718  | + |   |   |   |   |   | 1 |        |          |          | MXD1  |
| chr2 | 70984709  | 70985764  | + | + | + | + |   |   | 4 |        |          | VAX2     |       |
| chr2 | 70988094  | 70988300  | + | + | + | + |   |   | 4 |        |          | VAX2     |       |
| chr2 | 72996564  | 73001768  | + | + | + |   |   |   | 3 |        | EMX1     |          |       |
| chr2 | 73004709  | 73005568  | + |   |   |   |   |   | 1 |        |          | EMX1     |       |

|      |           |           |   |   |   |   |   |   |        |           |         |         |
|------|-----------|-----------|---|---|---|---|---|---|--------|-----------|---------|---------|
| chr2 | 74578548  | 74580546  |   |   | + |   |   | 1 |        |           | LBX2    | PCGF1   |
| chr2 | 74728637  | 74729070  | + |   | + |   |   | 2 | SEMA4F | LOC130951 |         |         |
| chr2 | 80383189  | 80384357  | + | + | + | + | + | 5 |        |           | LRRTM1  |         |
| chr2 | 80384879  | 80385230  |   |   |   | + |   | 1 |        | LRRTM1    | CTNNA2  |         |
| chr2 | 85213468  | 85216104  | + | + |   | + |   | 3 |        | TCF7L1    |         |         |
| chr2 | 86890112  | 86890512  | + | + | + |   | + | 4 |        |           |         | CD8B    |
| chr2 | 91033167  | 91035292  |   |   | + |   |   | 1 |        |           |         |         |
| chr2 | 95054585  | 95056158  |   |   |   | + |   | 1 |        | MAL       |         |         |
| chr2 | 96868947  | 96869327  | + |   |   |   |   | 1 |        |           | ANKRD23 | ANKRD39 |
| chr2 | 98329306  | 98330619  |   |   | + | + |   | 2 |        |           | CNGA3   |         |
| chr2 | 104825560 | 104828202 |   |   | + | + |   | 2 |        |           |         |         |
| chr2 | 104835284 | 104839920 |   |   | + | + |   | 2 |        |           | POU3F3  |         |
| chr2 | 104850186 | 104850858 |   |   |   | + |   | 1 |        |           |         |         |
| chr2 | 110327142 | 110327511 | + |   |   |   |   | 1 | NPHP1  |           |         |         |
| chr2 | 111591678 | 111597436 | + |   | + |   |   | 2 |        | BCL2L11   |         |         |
| chr2 | 113749830 | 113750087 | + |   |   | + |   | 2 |        |           | PAX8    |         |
| chr2 | 113751065 | 113752511 | + |   |   |   |   | 1 |        |           | PAX8    |         |
| chr2 | 115635208 | 115637235 |   |   |   | + |   | 1 |        | DPP10     | DPP10   |         |
| chr2 | 118698240 | 118698936 |   | + |   |   |   | 1 |        |           |         |         |
| chr2 | 119248536 | 119248785 |   |   | + |   |   | 1 |        |           |         |         |
| chr2 | 119329502 | 119332035 | + | + | + | + |   | 4 | EN1    |           |         |         |
| chr2 | 121061021 | 121061811 |   | + |   |   |   | 1 |        |           |         |         |
| chr2 | 124498723 | 124499725 |   |   | + | + |   | 2 |        | CNTNAP5   |         |         |
| chr2 | 130061514 | 130061826 |   |   | + |   |   | 1 |        |           |         |         |
| chr2 | 136590557 | 136592250 |   |   |   | + |   | 1 | CXCR4  | CXCR4     |         |         |
| chr2 | 142604195 | 142605023 |   |   |   | + |   | 1 |        |           | LRP1B   |         |
| chr2 | 144989927 | 144991848 |   |   |   | + |   | 1 |        |           | ZFHX1B  |         |
| chr2 | 149362007 | 149362304 |   |   |   | + |   | 1 |        |           | KIF5C   |         |
| chr2 | 154042696 | 154043704 |   |   |   | + |   | 1 |        | RPRM      |         |         |
| chr2 | 154437860 | 154438164 |   |   |   | + | + | 2 |        |           | GALNT13 |         |
| chr2 | 156893804 | 156894601 | + |   | + |   |   | 2 |        |           | NR4A2   |         |
| chr2 | 161981541 | 161981971 |   |   |   | + |   | 1 |        |           | TBR1    | PSMD14  |
| chr2 | 161983408 | 161983842 |   |   | + | + | + | 3 |        |           | TBR1    | PSMD14  |
| chr2 | 162638480 | 162639125 |   |   |   | + |   | 1 |        |           | DPP4    |         |
| chr2 | 163912987 | 163913285 | + |   |   |   |   | 1 |        |           |         |         |
| chr2 | 170044128 | 170044702 |   | + |   |   |   | 1 |        | BBS5      |         |         |

|      |           |           |   |   |   |   |   |   |   |        |       |        |        |
|------|-----------|-----------|---|---|---|---|---|---|---|--------|-------|--------|--------|
| chr2 | 171378357 | 171378795 |   |   |   | + |   |   | 1 | GAD1   |       |        |        |
| chr2 | 171384799 | 171385226 | + |   | + | + |   |   | 3 |        |       | GAD1   |        |
| chr2 | 171386793 | 171388604 | + |   | + | + |   |   | 3 |        |       | GAD1   |        |
| chr2 | 172654158 | 172654458 |   |   | + |   |   |   | 1 | DLX1   |       |        | MAP1D  |
| chr2 | 172656090 | 172656446 | + | + |   |   |   |   | 2 | DLX1   |       |        | MAP1D  |
| chr2 | 172659536 | 172660405 |   |   |   |   |   | + | 1 |        |       | DLX1   | MAP1D  |
| chr2 | 172681051 | 172681488 |   | + | + |   |   |   | 2 | DLX2   |       |        |        |
| chr2 | 174899113 | 174900369 |   |   | + |   |   |   | 1 |        |       |        |        |
| chr2 | 174913090 | 174915799 | + |   |   |   |   |   | 1 |        |       |        | CIR    |
| chr2 | 174916662 | 174917322 | + | + |   |   |   |   | 2 |        |       |        | CIR    |
| chr2 | 176639822 | 176640909 | + | + | + |   |   |   | 3 |        |       |        |        |
| chr2 | 176641378 | 176641695 | + | + | + |   |   |   | 3 |        |       |        |        |
| chr2 | 176644493 | 176645055 |   |   | + |   |   |   | 1 |        |       |        | EVX2   |
| chr2 | 176652334 | 176656692 | + | + | + | + | + |   | 5 | HOXD13 |       | EVX2   |        |
| chr2 | 176657758 | 176658041 |   |   | + |   |   |   | 1 | HOXD13 |       |        |        |
| chr2 | 176658240 | 176658582 | + | + | + | + |   |   | 4 | HOXD13 |       |        |        |
| chr2 | 176672309 | 176673755 | + | + | + | + | + |   | 5 | HOXD11 |       | HOXD12 | HOXD13 |
| chr2 | 176685531 | 176685786 |   | + |   |   |   |   | 1 | HOXD10 |       |        | HOXD11 |
| chr2 | 176689012 | 176689669 | + | + | + | + | + |   | 5 | HOXD10 |       |        | HOXD11 |
| chr2 | 176690354 | 176690648 | + | + | + | + | + |   | 5 | HOXD9  |       | HOXD10 | HOXD11 |
| chr2 | 176694671 | 176696537 | + | + | + | + | + |   | 5 | HOXD8  | HOXD9 |        | HOXD10 |
| chr2 | 176701197 | 176701432 |   | + |   |   |   |   | 1 | HOXD8  |       |        | HOXD9  |
| chr2 | 176701726 | 176703803 | + | + | + |   | + |   | 4 |        | HOXD8 |        | HOXD9  |
| chr2 | 176723195 | 176723460 | + |   |   | + |   |   | 2 | HOXD4  |       |        |        |
| chr2 | 176737660 | 176738187 | + | + | + | + | + |   | 5 |        |       | HOXD3  |        |
| chr2 | 176744501 | 176745459 | + |   |   |   |   |   | 1 |        |       | HOXD3  |        |
| chr2 | 176750998 | 176751690 |   |   | + |   |   |   | 1 | HOXD1  |       |        | HOXD3  |
| chr2 | 177063318 | 177063771 | + |   |   |   |   |   | 1 |        |       |        |        |
| chr2 | 182229467 | 182230172 |   |   |   |   | + |   | 1 |        | CERKL |        |        |
| chr2 | 186311638 | 186312155 | + | + | + |   |   |   | 3 | FSIP2  |       |        |        |
| chr2 | 188864662 | 188865964 |   |   |   | + |   |   | 1 |        | GULP1 |        |        |
| chr2 | 198357997 | 198359844 | + | + | + | + |   |   | 4 |        | BOLL  |        |        |
| chr2 | 200028748 | 200037926 | + |   | + |   |   |   | 2 |        | SATB2 |        |        |
| chr2 | 200041933 | 200042417 |   |   | + |   |   |   | 1 | SATB2  |       |        |        |
| chr2 | 200043743 | 200044658 | + |   | + |   |   |   | 2 |        |       |        |        |
| chr2 | 202744297 | 202744541 | + |   | + |   |   |   | 2 |        |       |        |        |

|      |           |           |   |   |   |   |   |          |         |          |          |  |
|------|-----------|-----------|---|---|---|---|---|----------|---------|----------|----------|--|
| chr2 | 207215020 | 207215667 | + |   | + |   | 2 |          |         |          |          |  |
| chr2 | 222867970 | 222868731 |   |   | + |   | 1 | FLJ32447 |         | PAX3     |          |  |
| chr2 | 222876898 | 222877252 |   |   | + |   | 1 | PAX3     |         | FLJ32447 |          |  |
| chr2 | 222878731 | 222879384 |   |   | + |   | 1 | PAX3     |         |          | FLJ32447 |  |
| chr2 | 222884738 | 222885759 |   |   | + | + | 2 |          |         |          | FLJ32447 |  |
| chr2 | 228754202 | 228754797 | + |   | + |   | 2 |          | SKIP    |          |          |  |
| chr2 | 232186604 | 232188169 | + |   |   |   | 1 |          |         |          |          |  |
| chr2 | 233474094 | 233474363 | + |   | + |   | 2 |          |         | NGEF     |          |  |
| chr2 | 236736534 | 236743501 |   |   | + |   | 1 |          | GBX2    |          |          |  |
| chr2 | 238059801 | 238060980 |   | + |   |   | 1 |          | MLPH    |          |          |  |
| chr3 | 325661    | 325893    |   |   | + |   | 1 |          |         | CHL1     |          |  |
| chr3 | 27729342  | 27729743  |   |   |   | + | 2 |          |         |          | EOMES    |  |
| chr3 | 27731217  | 27731426  |   |   |   | + | 1 |          |         |          | EOMES    |  |
| chr3 | 27740201  | 27740679  | + |   | + | + | 3 | EOMES    |         |          |          |  |
| chr3 | 32833199  | 32835510  |   |   |   | + | 1 |          | LIN41   |          |          |  |
| chr3 | 35655514  | 35656632  |   |   | + | + | 2 | ARPP-21  |         |          |          |  |
| chr3 | 38055633  | 38056191  |   | + |   |   | 1 | PLCD1    | DLEC1   |          |          |  |
| chr3 | 42281154  | 42282524  | + |   | + |   | 2 |          | CCK     |          |          |  |
| chr3 | 42702089  | 42702920  |   |   | + |   | 1 |          |         | KBTBD5   | GUP1     |  |
| chr3 | 44011412  | 44016108  |   |   |   | + | 1 |          |         |          |          |  |
| chr3 | 44038319  | 44038841  |   |   | + |   | 1 |          |         |          |          |  |
| chr3 | 44701933  | 44702241  |   |   | + |   | 1 |          |         |          |          |  |
| chr3 | 47025491  | 47026613  |   |   | + |   | 1 |          |         |          | SETD2    |  |
| chr3 | 58547519  | 58547943  |   |   |   | + | 1 | FAM107A  |         |          |          |  |
| chr3 | 61521366  | 61524706  |   |   | + |   | 1 |          | PTPRG   |          |          |  |
| chr3 | 62329329  | 62330049  | + |   | + | + | 3 |          |         |          | ZNF312   |  |
| chr3 | 62331157  | 62331415  | + |   | + | + | 3 |          |         | ZNF312   |          |  |
| chr3 | 62331811  | 62332352  | + |   | + |   | 2 |          |         | ZNF312   |          |  |
| chr3 | 62332677  | 62334811  |   |   | + | + | 2 |          | ZNF312  |          |          |  |
| chr3 | 62337648  | 62338119  | + |   | + |   | 2 | ZNF312   |         |          |          |  |
| chr3 | 65317241  | 65317921  | + |   |   |   | 1 |          |         | MAGI1    | MAGI1    |  |
| chr3 | 69063471  | 69064722  |   |   |   | + | 1 |          | FAM19A4 |          |          |  |
| chr3 | 79898326  | 79898587  |   |   | + |   | 1 |          |         |          |          |  |
| chr3 | 106555217 | 106555649 | + |   | + |   | 3 |          |         |          |          |  |
| chr3 | 114642987 | 114643328 | + |   |   | + | 2 |          | WDR52   |          | CCDC52   |  |
| chr3 | 126558603 | 126559168 |   |   |   | + | 1 |          |         | ZNF148   |          |  |

|      |           |           |   |   |   |   |   |   |        |          |        |        |
|------|-----------|-----------|---|---|---|---|---|---|--------|----------|--------|--------|
| chr3 | 127191754 | 127192139 | + |   |   |   |   | 1 |        |          |        | ROPN1B |
| chr3 | 128150947 | 128151207 |   |   |   | + |   | 1 |        |          | CHCHD6 |        |
| chr3 | 129116681 | 129117354 | + | + |   |   |   | 2 | KLHDC6 |          |        |        |
| chr3 | 129688183 | 129694961 |   | + | + | + |   | 3 |        | GATA2    |        |        |
| chr3 | 134239673 | 134240582 |   |   |   | + |   | 1 |        | TMEM108  |        |        |
| chr3 | 134985249 | 134985650 |   |   |   | + |   | 1 |        |          |        | TF     |
| chr3 | 138234029 | 138234370 |   |   |   | + |   | 1 |        |          |        |        |
| chr3 | 138965652 | 138967141 |   |   |   | + |   | 1 |        |          | SOX14  |        |
| chr3 | 138970117 | 138970708 |   |   |   | + |   | 1 |        |          |        | SOX14  |
| chr3 | 138971739 | 138972096 | + |   |   | + |   | 2 |        |          |        | SOX14  |
| chr3 | 139211682 | 139211893 | + |   |   | + |   | 2 |        | CLDN18   |        |        |
| chr3 | 139635957 | 139637308 |   |   |   |   | + | 1 |        | FAM62C   |        |        |
| chr3 | 140139315 | 140141794 |   |   |   |   | + | 1 |        |          |        | FOXL2  |
| chr3 | 140161932 | 140162266 |   |   |   | + |   | 1 |        |          |        |        |
| chr3 | 140245377 | 140246800 | + |   |   |   |   | 1 |        | FLJ46210 |        |        |
| chr3 | 142998743 | 142999326 | + | + |   | + | + | 4 |        |          | GRK7   |        |
| chr3 | 144163825 | 144165955 |   |   |   | + |   | 1 |        | PAQR9    |        |        |
| chr3 | 147669796 | 147670397 |   | + |   |   | + | 2 |        |          | PLSCR2 |        |
| chr3 | 148559803 | 148560359 | + |   |   | + |   | 2 |        |          |        |        |
| chr3 | 148591199 | 148594390 | + | + | + | + | + | 5 |        |          | ZIC4   |        |
| chr3 | 148596296 | 148597166 | + |   |   | + |   | 2 |        |          | ZIC4   |        |
| chr3 | 148598452 | 148599108 | + |   |   | + |   | 2 |        |          | ZIC4   |        |
| chr3 | 148609676 | 148611686 | + |   | + | + |   | 3 | ZIC4   | ZIC1     |        |        |
| chr3 | 148613030 | 148613264 | + |   | + | + | + | 4 | ZIC4   |          | ZIC1   |        |
| chr3 | 148613754 | 148614020 | + |   | + | + |   | 3 | ZIC4   |          | ZIC1   |        |
| chr3 | 148619591 | 148620015 | + |   | + | + |   | 3 |        |          |        | ZIC1   |
| chr3 | 148621604 | 148622251 | + |   |   |   |   | 1 |        |          |        | ZIC1   |
| chr3 | 149898130 | 149898619 |   |   |   | + |   | 1 |        | AGTR1    |        |        |
| chr3 | 151251142 | 151251356 |   |   |   | + |   | 1 |        |          |        |        |
| chr3 | 155629039 | 155629656 |   |   | + | + | + | 3 |        |          | GPR149 |        |
| chr3 | 157491683 | 157492011 |   |   | + | + |   | 2 |        |          | KCNAB1 |        |
| chr3 | 158320675 | 158321042 | + |   |   |   |   | 1 |        |          |        |        |
| chr3 | 158743358 | 158743915 |   |   |   | + |   | 1 |        |          |        |        |
| chr3 | 159294745 | 159295455 | + | + | + | + |   | 4 |        |          |        | SHOX2  |
| chr3 | 159303924 | 159304295 | + |   |   |   |   | 1 | RSRC1  |          | SHOX2  |        |
| chr3 | 161649876 | 161650891 | + | + |   | + | + | 4 |        | TRIM59   |        |        |



|      |           |           |   |   |   |   |   |   |          |          |                |          |
|------|-----------|-----------|---|---|---|---|---|---|----------|----------|----------------|----------|
| chr3 | 172228764 | 172228983 |   |   |   |   | + | 1 | SLC2A2   |          |                |          |
| chr3 | 182895706 | 182896713 | + | + |   |   | + | 3 |          |          |                |          |
| chr3 | 182919876 | 182920169 |   |   |   |   | + | 1 |          |          |                | SOX2     |
| chr3 | 187394036 | 187394919 | + | + |   |   | + | 3 |          |          | DGKG           |          |
| chr3 | 187561402 | 187562802 |   |   |   |   | + | 1 |          | DGKG     |                |          |
| chr3 | 188870606 | 188870867 | + |   |   |   | + | 2 |          |          | SST            |          |
| chr3 | 193608513 | 193610685 |   |   |   |   | + | + | 2        | FGF12    |                |          |
| chr3 | 193714764 | 193715828 |   |   |   |   | + | + | 2        |          | FGF12          |          |
| chr3 | 195070044 | 195070580 | + |   |   |   |   | 1 |          |          |                |          |
| chr3 | 195598888 | 195600274 | + | + |   |   | + | + | 4        |          | GP5            |          |
| chr3 | 195688344 | 195690071 |   |   |   |   |   | + | 1        |          |                |          |
| chr3 | 197097983 | 197098360 | + |   |   |   | + |   | 2        |          | TNK2           |          |
| chr3 | 197418607 | 197418840 |   | + | + | + | + | 4 | OSTalpha |          | ZDHHC19        |          |
| chr4 | 1293491   | 1293835   | + |   |   |   | + |   | 2        |          | MAEA           |          |
| chr4 | 1386292   | 1391730   | + | + | + | + | + | 5 |          |          |                | FLJ34443 |
| chr4 | 4910534   | 4911092   | + | + | + | + | + | 5 | MSX1     |          |                |          |
| chr4 | 6716573   | 6716990   |   |   |   |   | + |   | 1        |          |                |          |
| chr4 | 10067228  | 10068451  |   |   |   |   | + |   | 1        |          | KIAA1729       |          |
| chr4 | 10071931  | 10072787  | + |   |   |   | + |   | 2        | KIAA1729 |                |          |
| chr4 | 13133161  | 13133718  | + |   |   |   | + |   | 3        |          |                |          |
| chr4 | 13135652  | 13135868  | + |   |   |   | + |   | 3        |          |                |          |
| chr4 | 13152661  | 13155592  | + |   |   |   |   |   | 1        |          | BAPX1          |          |
| chr4 | 19862375  | 19865966  |   |   |   |   | + | + | +        | 3        | SLIT2          |          |
| chr4 | 24699205  | 24699608  | + | + |   |   | + | + | 4        |          |                |          |
| chr4 | 30330303  | 30333940  | + | + | + |   |   |   | 3        |          | PCDH7          |          |
| chr4 | 36921646  | 36923374  |   |   |   |   | + |   | 1        |          |                |          |
| chr4 | 41341050  | 41341339  |   |   |   |   | + |   | 1        |          | DKFZP686A01247 |          |
| chr4 | 41443942  | 41444568  |   |   |   |   | + |   | 1        |          | PHOX2B         |          |
| chr4 | 41562143  | 41562343  | + |   |   |   |   |   | 1        |          |                |          |
| chr4 | 41570203  | 41570551  | + |   |   |   | + | + | 3        |          |                |          |
| chr4 | 41574982  | 41575257  |   |   |   |   | + |   | 1        |          |                |          |
| chr4 | 41575935  | 41576175  | + |   |   |   | + |   | 2        |          |                |          |
| chr4 | 41577208  | 41577721  | + |   |   |   | + |   | 2        |          |                |          |
| chr4 | 46689886  | 46690629  |   |   |   |   | + |   | 1        |          | GABRA4         |          |
| chr4 | 46729185  | 46729697  |   |   |   |   | + | + | 2        |          | GABRB1         |          |
| chr4 | 48682548  | 48683565  |   |   |   |   | + |   | 1        |          | FLJ21511       |          |

|      |           |           |   |   |   |   |   |   |          |         |         |         |
|------|-----------|-----------|---|---|---|---|---|---|----------|---------|---------|---------|
| chr4 | 52612146  | 52613037  |   |   | + |   |   | 1 |          | SPATA18 |         |         |
| chr4 | 54660921  | 54662820  |   |   | + |   |   | 1 |          | GSH2    |         |         |
| chr4 | 54670145  | 54670959  | + |   | + |   |   | 2 |          |         |         | GSH2    |
| chr4 | 54790943  | 54795088  |   |   | + |   |   | 1 |          |         | PDGFRA  |         |
| chr4 | 56354384  | 56354901  | + |   | + |   |   | 2 |          |         |         |         |
| chr4 | 56874983  | 56875440  |   |   | + |   |   | 1 |          |         |         |         |
| chr4 | 57216379  | 57217460  |   |   | + |   |   | 1 |          | HOP     | HOP     |         |
| chr4 | 57756509  | 57756872  |   |   | + |   |   | 1 |          |         |         |         |
| chr4 | 62065609  | 62065843  |   |   | + |   |   | 1 |          |         | LPHN3   |         |
| chr4 | 66217789  | 66218215  |   |   |   | + |   | 1 |          | EPHA5   |         |         |
| chr4 | 77726102  | 77726363  |   |   |   |   | + | 1 |          |         | SHROOM3 |         |
| chr4 | 81104869  | 81105172  | + |   |   |   |   | 1 |          |         | ANTXR2  |         |
| chr4 | 81337162  | 81337627  | + |   |   |   |   | 1 |          |         | PRDM8   |         |
| chr4 | 81347254  | 81347715  | + |   |   |   |   | 1 |          |         |         | PRDM8   |
| chr4 | 85622855  | 85623548  | + |   |   |   |   | 1 |          |         |         | NKX6-1  |
| chr4 | 85624011  | 85624276  |   |   | + |   |   | 1 |          |         |         | NKX6-1  |
| chr4 | 85633022  | 85633898  |   |   | + | + |   | 2 |          |         | NKX6-1  |         |
| chr4 | 85641954  | 85642214  |   |   | + |   |   | 1 | NKX6-1   |         |         |         |
| chr4 | 94974810  | 94975333  |   |   | + |   |   | 1 |          |         |         | ATOH1   |
| chr4 | 99283626  | 99283828  |   |   | + |   |   | 1 | MGC46496 |         |         |         |
| chr4 | 102930853 | 102931222 | + |   |   |   |   | 1 |          |         | BANK1   |         |
| chr4 | 108176005 | 108176902 |   |   | + |   |   | 1 |          | DKK2    |         |         |
| chr4 | 110442420 | 110443706 |   |   |   | + |   | 1 |          | COL25A1 |         |         |
| chr4 | 111752097 | 111752840 |   |   | + | + | + | 3 |          |         |         | PITX2   |
| chr4 | 111758678 | 111758932 | + |   | + |   |   | 2 |          |         | PITX2   |         |
| chr4 | 111761512 | 111763913 |   |   | + |   |   | 1 |          | PITX2   |         |         |
| chr4 | 111769329 | 111769652 | + |   | + | + | + | 4 |          |         | PITX2   |         |
| chr4 | 111772529 | 111773659 |   |   |   | + |   | 1 |          |         | PITX2   |         |
| chr4 | 113552391 | 113552772 | + |   |   |   |   | 1 |          |         | ALPK1   |         |
| chr4 | 113651275 | 113652045 | + |   |   | + |   | 2 |          |         |         | NEUROG2 |
| chr4 | 122521018 | 122521740 |   |   | + |   | + | 2 |          | GPR103  |         |         |
| chr4 | 123090863 | 123092632 |   |   |   | + |   | 1 |          |         |         |         |
| chr4 | 124646231 | 124646607 | + |   |   |   | + | 2 |          |         |         |         |
| chr4 | 126455346 | 126458380 |   |   |   | + | + | 2 |          | FAT4    |         |         |
| chr4 | 134288613 | 134289892 |   | + |   | + |   | 2 | PCDH10   |         |         |         |
| chr4 | 134291113 | 134293078 |   |   | + | + |   | 2 |          |         | PCDH10  |         |

|      |           |           |   |   |   |   |   |   |         |          |          |        |
|------|-----------|-----------|---|---|---|---|---|---|---------|----------|----------|--------|
| chr4 | 140420515 | 140420899 |   |   | + |   |   | 1 |         |          | OSAP     | NDUFC1 |
| chr4 | 141638458 | 141638954 |   | + |   | + | + | 3 |         |          |          |        |
| chr4 | 147778639 | 147781351 | + |   |   | + |   | 2 |         | POU4F2   |          |        |
| chr4 | 151720214 | 151720749 | + |   |   |   |   | 1 | MAB21L2 |          | LRBA     |        |
| chr4 | 151723462 | 151724535 | + |   |   |   |   | 1 |         |          | MAB21L2  |        |
| chr4 | 155473581 | 155474053 | + |   | + |   |   | 2 |         |          | DCHS2    |        |
| chr4 | 155881129 | 155881434 | + |   |   |   |   | 1 | LRAT    |          |          |        |
| chr4 | 155884270 | 155885283 |   |   |   | + |   | 1 |         | LRAT     |          |        |
| chr4 | 156348619 | 156349659 |   |   |   | + |   | 1 |         | NPY2R    |          |        |
| chr4 | 156517052 | 156517544 |   |   |   | + |   | 1 |         |          | ASAP     |        |
| chr4 | 158362747 | 158363503 |   |   |   |   | + | 1 |         |          | GRIA2    |        |
| chr4 | 164472405 | 164472921 |   |   |   | + |   | 1 |         |          | NPY1R    |        |
| chr4 | 164484272 | 164485222 |   |   | + |   |   | 1 |         | NPY5R    |          |        |
| chr4 | 165523779 | 165524627 |   |   | + |   |   | 1 |         |          |          |        |
| chr4 | 172970310 | 172971693 |   |   | + | + |   | 2 |         | GALNT17  |          |        |
| chr4 | 174657923 | 174658134 |   |   | + |   |   | 1 |         |          |          |        |
| chr4 | 174658600 | 174659018 | + |   | + |   |   | 2 |         |          |          |        |
| chr4 | 174664467 | 174664767 | + |   |   |   |   | 1 |         |          |          |        |
| chr4 | 174674490 | 174674921 | + |   | + | + |   | 3 |         |          |          | HAND2  |
| chr4 | 174679941 | 174680523 |   |   |   | + |   | 1 |         |          |          | HAND2  |
| chr4 | 174684909 | 174685420 | + |   |   |   |   | 1 |         |          | HAND2    |        |
| chr4 | 174686622 | 174688044 | + | + | + | + | + | 5 |         | HAND2    |          |        |
| chr4 | 174688404 | 174689537 | + |   | + | + | + | 4 | HAND2   |          |          |        |
| chr4 | 183299273 | 183299475 | + |   |   |   |   | 1 |         |          |          |        |
| chr4 | 183300391 | 183303364 |   |   | + |   |   | 1 |         |          |          |        |
| chr4 | 183964544 | 183965347 | + |   |   |   |   | 1 |         |          |          | ODZ3   |
| chr4 | 184255825 | 184258373 | + |   |   |   |   | 1 |         | FLJ30277 |          |        |
| chr4 | 186174237 | 186174744 | + |   |   |   |   | 1 | HELT    |          |          |        |
| chr4 | 186176217 | 186179741 |   |   | + |   |   | 1 |         |          | HELT     |        |
| chr4 | 187713274 | 187713838 |   | + |   |   |   | 1 |         | MTNR1A   |          |        |
| chr5 | 103806    | 104899    | + |   | + | + |   | 3 |         |          |          |        |
| chr5 | 222579    | 222798    | + |   |   |   |   | 1 |         |          | KIAA1909 |        |
| chr5 | 1927908   | 1932032   | + |   | + |   |   | 2 |         |          | IRX4     |        |
| chr5 | 1932690   | 1932928   | + | + |   |   |   | 2 |         |          | IRX4     |        |
| chr5 | 1934925   | 1940743   | + |   | + |   |   | 2 |         | IRX4     |          |        |
| chr5 | 2791954   | 2794237   | + | + | + | + | + | 5 |         |          |          | IRX2   |

|      |          |          |   |   |   |   |   |  |   |           |          |        |           |
|------|----------|----------|---|---|---|---|---|--|---|-----------|----------|--------|-----------|
| chr5 | 2801369  | 2810024  |   | + |   | + |   |  | 2 |           | IRX2     | CEI    |           |
| chr5 | 3643645  | 3645000  | + |   | + | + | + |  | 4 | IRX1      |          |        |           |
| chr5 | 3647468  | 3656054  | + | + | + | + | + |  | 5 |           |          | IRX1   |           |
| chr5 | 3659489  | 3660135  | + |   | + |   |   |  | 2 |           |          |        | IRX1      |
| chr5 | 5192442  | 5193941  | + |   | + | + |   |  | 3 |           | ADAMTS16 |        |           |
| chr5 | 13863127 | 13863333 |   |   | + |   |   |  | 1 |           |          | DNAH5  |           |
| chr5 | 37870429 | 37870885 | + | + |   |   |   |  | 2 |           | GDNF     | GDNF   |           |
| chr5 | 37872505 | 37876483 |   |   |   | + |   |  | 1 |           | GDNF     |        |           |
| chr5 | 39460650 | 39461077 |   |   | + | + |   |  | 2 |           | DAB2     |        |           |
| chr5 | 40715260 | 40717838 |   | + |   |   |   |  | 1 |           | PTGER4   |        |           |
| chr5 | 41545541 | 41545923 |   |   |   | + |   |  | 1 |           |          | PLCXD3 |           |
| chr5 | 42460096 | 42460804 |   |   | + |   |   |  | 1 |           |          | GHR    |           |
| chr5 | 42986834 | 42988167 |   |   | + |   |   |  | 1 |           |          |        |           |
| chr5 | 43027791 | 43028712 |   |   | + |   |   |  | 1 |           |          |        |           |
| chr5 | 43030384 | 43030693 | + |   | + | + |   |  | 3 |           |          |        |           |
| chr5 | 43036101 | 43036548 | + |   |   |   |   |  | 1 |           |          |        |           |
| chr5 | 43053726 | 43054425 |   |   | + |   |   |  | 1 |           |          |        |           |
| chr5 | 43073017 | 43073277 | + |   |   |   |   |  | 1 |           |          |        | LOC389289 |
| chr5 | 43076103 | 43076390 |   |   | + | + |   |  | 2 | LOC389289 |          |        |           |
| chr5 | 43077865 | 43079234 |   |   | + |   |   |  | 1 | LOC389289 |          |        |           |
| chr5 | 50300843 | 50301494 |   |   |   | + |   |  | 1 |           |          |        |           |
| chr5 | 50714390 | 50715132 |   |   | + |   |   |  | 1 |           | ISL1     |        |           |
| chr5 | 50730742 | 50731109 | + |   | + | + |   |  | 3 |           |          |        | ISL1      |
| chr5 | 54215121 | 54215928 |   |   |   |   | + |  | 1 |           |          |        |           |
| chr5 | 54554812 | 54555385 | + | + | + | + | + |  | 5 |           |          |        | UNG2      |
| chr5 | 55153331 | 55153723 |   |   | + |   |   |  | 1 |           |          |        | DDX4      |
| chr5 | 57914483 | 57914934 |   |   |   | + |   |  | 1 |           | RAB3C    |        |           |
| chr5 | 63290801 | 63291163 |   |   | + |   |   |  | 1 |           |          |        | HTR1A     |
| chr5 | 72561960 | 72562253 |   |   | + |   |   |  | 1 |           |          |        |           |
| chr5 | 72564856 | 72565732 | + | + |   |   |   |  | 2 |           |          |        |           |
| chr5 | 72629904 | 72631564 | + | + | + | + | + |  | 5 |           |          |        |           |
| chr5 | 72711877 | 72714177 | + |   | + | + |   |  | 3 |           |          |        |           |
| chr5 | 72751164 | 72751753 |   |   | + |   |   |  | 1 |           |          |        |           |
| chr5 | 72767578 | 72767817 | + |   | + | + |   |  | 3 |           |          |        |           |
| chr5 | 72775808 | 72776556 |   |   | + | + |   |  | 2 |           |          |        | FOXD1     |
| chr5 | 76285192 | 76286284 |   |   | + |   |   |  | 1 |           |          | CRHBP  |           |

|      |           |           |   |   |   |   |   |   |          |          |         |       |
|------|-----------|-----------|---|---|---|---|---|---|----------|----------|---------|-------|
| chr5 | 76968074  | 76969279  |   |   | + | + |   | 2 |          |          | OTP     |       |
| chr5 | 76970338  | 76971052  |   |   | + | + |   | 2 | OTP      |          |         |       |
| chr5 | 77176299  | 77176670  |   |   | + |   |   | 1 |          |          |         |       |
| chr5 | 77182755  | 77183541  |   |   | + | + |   | 2 |          |          |         |       |
| chr5 | 77304107  | 77304543  |   |   | + |   |   | 1 |          |          |         |       |
| chr5 | 83713894  | 83714150  |   |   |   | + |   | 1 |          |          | EDIL3   |       |
| chr5 | 83715341  | 83716476  |   |   |   | + |   | 1 |          | EDIL3    |         |       |
| chr5 | 87991395  | 87991620  |   |   | + |   |   | 1 |          |          |         |       |
| chr5 | 88004392  | 88004663  | + | + | + | + |   | 4 |          |          |         |       |
| chr5 | 88005717  | 88007826  |   |   | + | + |   | 2 |          |          |         |       |
| chr5 | 88215623  | 88216014  |   | + |   | + | + | 3 | MEF2C    |          |         |       |
| chr5 | 92931996  | 92934631  |   |   | + | + |   | 2 |          |          |         |       |
| chr5 | 92955025  | 92955245  |   |   | + |   |   | 1 |          |          | NR2F1   |       |
| chr5 | 92956286  | 92956586  |   |   | + |   |   | 1 |          |          |         | NR2F1 |
| chr5 | 100264467 | 100264854 |   |   |   | + |   | 1 |          |          | ST8SIA4 |       |
| chr5 | 110102505 | 110103122 |   |   | + |   |   | 1 |          | LOC91137 |         |       |
| chr5 | 113418971 | 113419904 |   |   |   | + |   | 1 |          |          |         |       |
| chr5 | 113724416 | 113727094 |   |   |   | + |   | 1 |          | KCNN2    |         |       |
| chr5 | 114542616 | 114544119 |   | + | + |   | + | 3 |          |          | TRIM36  |       |
| chr5 | 115179248 | 115180612 | + |   | + |   |   | 2 |          | CDO1     |         |       |
| chr5 | 115325507 | 115325992 |   |   | + |   |   | 1 | FLJ90650 |          |         |       |
| chr5 | 115939901 | 115940283 |   |   |   | + |   | 1 | SEMA6A   |          |         |       |
| chr5 | 122458576 | 122459342 |   |   | + |   |   | 1 |          |          |         |       |
| chr5 | 122461778 | 122463450 | + |   | + | + |   | 3 |          |          |         |       |
| chr5 | 127899858 | 127900162 |   |   |   | + |   | 1 |          |          | FBN2    |       |
| chr5 | 132110773 | 132111810 | + |   |   |   |   | 1 | KIF3A    | FLJ16793 |         |       |
| chr5 | 134390992 | 134393045 |   |   | + |   |   | 1 |          |          | PITX1   |       |
| chr5 | 134853298 | 134854395 | + | + |   | + | + | 4 |          |          |         |       |
| chr5 | 140147276 | 140148323 |   |   | + |   |   | 1 | PCDHA2   | PCDHA1   |         |       |
| chr5 | 140154758 | 140155072 | + |   | + | + |   | 3 | PCDHA3   | PCDHA2   |         |       |
| chr5 | 140166977 | 140167452 |   |   | + |   |   | 1 | PCDHA5   | PCDHA4   |         |       |
| chr5 | 140217047 | 140218075 |   |   | + |   |   | 1 | PCDHA11  | PCDHA10  |         |       |
| chr5 | 140222258 | 140223191 |   |   | + |   |   | 1 | PCDHA11  |          | PCDHA10 |       |
| chr5 | 140285897 | 140287377 |   |   |   | + |   | 1 |          | PCDHAC1  |         |       |
| chr5 | 140326290 | 140327115 |   |   |   | + |   | 1 |          | PCDHAC2  | PCDHAC1 |       |
| chr5 | 140601049 | 140601882 | + |   | + |   |   | 2 | PCDHB15  |          |         |       |

|      |           |           |   |   |   |   |   |   |          |          |        |         |
|------|-----------|-----------|---|---|---|---|---|---|----------|----------|--------|---------|
| chr5 | 140691982 | 140692726 |   |   | + |   |   | 1 | PCDHGA2  | PCDHGA1  |        |         |
| chr5 | 140699314 | 140699527 |   |   | + |   |   | 1 | PCDHGA3  | PCDHGA2  |        |         |
| chr5 | 140703733 | 140704084 |   |   | + |   |   | 1 | PCDHGB1  | PCDHGA3  |        |         |
| chr5 | 140705236 | 140706075 |   |   | + |   |   | 1 | PCDHGB1  | PCDHGA3  |        |         |
| chr5 | 140714905 | 140715212 | + |   | + | + |   | 3 | PCDHGB2  | PCDHGA4  |        |         |
| chr5 | 140724146 | 140724826 | + |   | + | + |   | 3 | PCDHGB3  | PCDHGA5  |        |         |
| chr5 | 140730235 | 140730448 | + |   | + | + |   | 3 | PCDHGA6  | PCDHGB3  |        |         |
| chr5 | 140731483 | 140732067 | + |   | + |   |   | 2 | PCDHGA6  | PCDHGB3  |        |         |
| chr5 | 140742586 | 140742952 |   |   | + | + |   | 2 | PCDHGB4  | PCDHGA7  |        |         |
| chr5 | 140744486 | 140744864 |   |   | + |   |   | 1 | PCDHGB4  | PCDHGA7  |        |         |
| chr5 | 140752570 | 140752866 |   |   | + | + |   | 2 | PCDHGB5  | PCDHGA8  |        |         |
| chr5 | 140754040 | 140754625 |   |   | + |   |   | 1 | PCDHGB5  | PCDHGA8  |        |         |
| chr5 | 140759198 | 140759843 | + |   | + |   |   | 2 | PCDHGA9  | PCDHGB5  |        |         |
| chr5 | 140769279 | 140769946 | + |   | + |   |   | 2 | PCDHGA10 | PCDHGB6  |        |         |
| chr5 | 140778942 | 140779543 | + |   | + |   |   | 2 | PCDHGA11 | PCDHGB7  |        |         |
| chr5 | 140780945 | 140781256 | + |   | + | + |   | 3 | PCDHGA12 | PCDHGA11 |        |         |
| chr5 | 140790679 | 140792801 | + | + | + | + | + | 5 |          | PCDHGA12 |        |         |
| chr5 | 140801413 | 140801872 |   |   | + |   |   | 1 |          | PCDHGA12 |        |         |
| chr5 | 140851249 | 140852519 | + |   | + |   |   | 2 |          | PCDHGC5  |        |         |
| chr5 | 140873098 | 140873373 |   |   | + |   |   | 1 |          |          |        | DIAPH1  |
| chr5 | 145698483 | 145700288 | + |   |   | + |   | 2 |          |          | POU4F3 |         |
| chr5 | 145702661 | 145703118 |   |   |   | + |   | 1 |          |          |        | POU4F3  |
| chr5 | 150264579 | 150264828 | + |   | + |   |   | 2 |          | ZNF300   |        |         |
| chr5 | 150306098 | 150306387 |   |   | + |   |   | 1 |          |          |        |         |
| chr5 | 158464873 | 158465080 | + |   |   |   |   | 1 | EBF      |          |        |         |
| chr5 | 158466136 | 158466578 |   |   |   | + |   | 1 | EBF      |          |        |         |
| chr5 | 170667775 | 170672468 |   |   | + |   | + | 2 |          |          | TLX3   | RANBP17 |
| chr5 | 170674209 | 170675356 | + |   |   | + |   | 2 |          |          |        | TLX3    |
| chr5 | 170675784 | 170676712 | + |   |   |   |   | 1 |          |          |        | TLX3    |
| chr5 | 172591656 | 172594834 |   | + | + |   |   | 2 |          |          | NKX2-5 |         |
| chr5 | 172596223 | 172597190 | + |   |   |   |   | 1 | NKX2-5   |          |        |         |
| chr5 | 172603436 | 172604430 |   |   | + |   |   | 1 | NKX2-5   |          |        |         |
| chr5 | 172604918 | 172605577 |   |   | + |   |   | 1 |          |          |        |         |
| chr5 | 174091287 | 174092335 | + |   |   | + |   | 2 |          |          |        | MSX2    |
| chr6 | 1323445   | 1324317   | + | + | + |   | + | 4 |          |          |        |         |
| chr6 | 1324693   | 1325013   |   |   | + |   |   | 1 |          |          |        |         |

|      |          |          |   |   |   |   |   |   |           |          |           |           |
|------|----------|----------|---|---|---|---|---|---|-----------|----------|-----------|-----------|
| chr6 | 1326743  | 1330210  | + |   | + |   |   | 2 | FOXF2     |          |           |           |
| chr6 | 1338049  | 1339169  | + | + |   | + | + | 4 |           |          | FOXF2     |           |
| chr6 | 1469153  | 1469542  |   |   | + |   |   | 1 |           |          |           |           |
| chr6 | 1546624  | 1547137  |   |   | + |   |   | 1 | FOXC1     |          |           |           |
| chr6 | 1549606  | 1560865  |   |   | + |   | + | 2 |           |          | FOXC1     | GMDS      |
| chr6 | 1569185  | 1570467  |   |   | + |   | + | 2 |           |          | GMDS      |           |
| chr6 | 5941185  | 5941485  | + |   | + | + |   | 3 |           |          |           | NRN1      |
| chr6 | 5942027  | 5942413  | + |   | + | + | + | 4 |           |          |           | NRN1      |
| chr6 | 5944149  | 5944786  |   |   |   | + |   | 1 |           |          | NRN1      |           |
| chr6 | 5947471  | 5950124  | + | + | + | + |   | 4 |           |          | NRN1      |           |
| chr6 | 5951689  | 5952042  |   |   | + |   |   | 1 |           |          | NRN1      |           |
| chr6 | 9507080  | 9507585  | + |   |   |   |   | 1 |           |          |           |           |
| chr6 | 10489545 | 10490340 | + | + | + | + | + | 5 |           |          |           |           |
| chr6 | 10492952 | 10493478 | + |   | + | + | + | 4 |           |          |           |           |
| chr6 | 10498025 | 10498551 | + | + | + | + | + | 5 |           |          |           | TFAP2A    |
| chr6 | 10498875 | 10499084 | + |   |   |   |   | 1 |           |          |           | TFAP2A    |
| chr6 | 10518096 | 10518676 |   |   | + |   |   | 1 |           |          | TFAP2A    |           |
| chr6 | 10519381 | 10521843 |   |   | + |   |   | 1 |           | TFAP2A   |           |           |
| chr6 | 10523005 | 10523304 |   |   | + |   |   | 1 |           | TFAP2A   |           |           |
| chr6 | 10525371 | 10525828 |   |   | + |   |   | 1 | TFAP2A    |          | T         |           |
| chr6 | 10530308 | 10530634 | + | + | + | + | + | 5 | TFAP2A    |          |           | MGC40222  |
| chr6 | 10989833 | 10990037 | + |   |   |   |   | 1 | LOC221711 |          | GCM2      |           |
| chr6 | 10995171 | 10995608 |   |   |   | + | + | 2 | GCM2      |          | LOC221711 |           |
| chr6 | 17210289 | 17210518 |   |   |   |   | + | 1 |           |          |           |           |
| chr6 | 19799890 | 19800284 | + |   |   | + | + | 3 |           |          |           |           |
| chr6 | 25760360 | 25760688 |   |   |   | + |   | 1 |           | SCGN     |           |           |
| chr6 | 25840672 | 25840936 |   |   | + |   |   | 1 | HIST1H2AA |          |           | HIST1H2BA |
| chr6 | 26280013 | 26280377 |   |   | + |   |   | 1 |           |          |           | HIST1H2BD |
| chr6 | 26305050 | 26305516 |   |   | + |   |   | 1 | HIST1H4D  |          | HIST1H3D  | HIST1H2AD |
| chr6 | 26312744 | 26313192 |   |   | + |   |   | 1 | HIST1H2AD | HIST1H4E |           | HIST1H2BF |
| chr6 | 26325191 | 26325500 |   |   | + |   |   | 1 | HIST1H3E  |          | HIST1H2AE |           |
| chr6 | 26348677 | 26348930 | + |   | + |   |   | 2 | HIST1H1D  |          | HIST1H4F  | HIST1H4G  |
| chr6 | 26358416 | 26358806 |   |   | + |   |   | 1 | HIST1H2BH |          | HIST1H3F  | HIST1H4F  |
| chr6 | 26380450 | 26380675 |   |   | + |   |   | 1 | HIST1H2BI |          |           |           |
| chr6 | 26721993 | 26722830 | + |   | + |   |   | 2 |           |          |           |           |
| chr6 | 27172608 | 27172983 |   |   |   | + | + | 2 |           |          |           |           |

|      |          |          |   |   |   |   |   |   |        |          |         |  |          |
|------|----------|----------|---|---|---|---|---|---|--------|----------|---------|--|----------|
| chr6 | 27336080 | 27336343 | + |   | + | + | + | 4 |        |          |         |  | PRSS16   |
| chr6 | 27571156 | 27571358 | + |   | + | + | + | 4 |        |          |         |  |          |
| chr6 | 27590868 | 27591068 |   |   | + |   |   | 1 |        |          |         |  |          |
| chr6 | 27706667 | 27707125 |   |   |   | + |   | 1 |        |          |         |  |          |
| chr6 | 27755773 | 27755984 | + |   | + |   |   | 2 |        |          |         |  |          |
| chr6 | 27763323 | 27763686 |   |   |   | + |   | 1 |        |          |         |  |          |
| chr6 | 28283262 | 28283584 |   |   | + | + |   | 2 |        |          |         |  |          |
| chr6 | 28334959 | 28335462 | + |   | + |   |   | 2 | ZNF187 | C6orf194 |         |  |          |
| chr6 | 28475104 | 28475630 |   |   |   | + |   | 1 |        |          |         |  |          |
| chr6 | 28662843 | 28663103 |   |   |   | + |   | 1 |        | ZNF452   |         |  |          |
| chr6 | 28691914 | 28692268 | + |   | + | + |   | 3 |        |          |         |  |          |
| chr6 | 28710833 | 28711274 |   |   |   | + |   | 1 |        |          |         |  |          |
| chr6 | 29064086 | 29064557 | + |   | + |   |   | 2 |        |          |         |  | ZNF311   |
| chr6 | 29092398 | 29092665 |   |   |   | + |   | 1 |        |          |         |  |          |
| chr6 | 29629090 | 29629812 | + |   |   |   |   | 1 |        |          |         |  |          |
| chr6 | 41636245 | 41636878 |   |   | + |   |   | 1 |        |          | FOXP4   |  |          |
| chr6 | 43720693 | 43721344 |   |   |   | + |   | 1 |        | C6orf206 |         |  | MAD2L1BP |
| chr6 | 45738965 | 45739792 |   | + |   | + | + | 3 |        |          |         |  |          |
| chr6 | 46205654 | 46205912 |   |   |   | + |   | 1 |        | ENPP4    |         |  |          |
| chr6 | 50790294 | 50791173 | + |   |   |   |   | 1 |        |          | TFAP2D  |  |          |
| chr6 | 50800109 | 50800334 |   |   |   | + |   | 1 |        |          | TFAP2D  |  |          |
| chr6 | 50899070 | 50899532 |   |   | + |   |   | 1 |        |          | TFAP2B  |  |          |
| chr6 | 50921274 | 50921658 |   |   | + |   |   | 1 |        |          | TFAP2B  |  |          |
| chr6 | 50926140 | 50926390 |   |   | + | + |   | 2 |        |          |         |  | TFAP2B   |
| chr6 | 55147130 | 55147351 |   |   | + |   |   | 1 |        |          | HCRTR2  |  |          |
| chr6 | 55551692 | 55552051 |   |   |   | + |   | 1 |        | HMGCLL1  |         |  |          |
| chr6 | 63053815 | 63054187 |   |   |   | + |   | 1 |        | KHDRBS2  |         |  |          |
| chr6 | 71048762 | 71049633 |   |   | + | + |   | 2 |        | COL9A1   | COL9A1  |  |          |
| chr6 | 72354996 | 72355249 | + |   | + |   |   | 2 |        |          |         |  |          |
| chr6 | 74065542 | 74066177 | + |   |   |   |   | 1 |        |          |         |  |          |
| chr6 | 74076150 | 74076774 |   |   |   |   | + | 1 |        |          |         |  |          |
| chr6 | 74081124 | 74081741 | + | + | + | + |   | 4 |        |          |         |  |          |
| chr6 | 75851601 | 75851808 |   |   |   | + |   | 1 |        |          | COL12A1 |  |          |
| chr6 | 75968300 | 75968853 |   | + |   | + |   | 2 |        |          | COL12A1 |  |          |
| chr6 | 84474317 | 84476097 |   |   |   | + |   | 1 |        | SNAP91   |         |  |          |
| chr6 | 84619540 | 84620477 |   |   | + |   |   | 1 | CYB5R4 | C6orf159 |         |  |          |



|      |           |           |   |   |   |   |   |   |        |          |         |        |
|------|-----------|-----------|---|---|---|---|---|---|--------|----------|---------|--------|
| chr6 | 85529422  | 85530851  |   |   | + | + |   | 2 |        | TBX18    |         |        |
| chr6 | 85539289  | 85541437  |   |   | + | + |   | 2 | TBX18  |          |         |        |
| chr6 | 94182994  | 94186398  |   |   |   | + |   | 1 |        | EPHA7    |         |        |
| chr6 | 100157740 | 100158693 |   |   | + |   | + | 2 | PRDM13 |          |         |        |
| chr6 | 100161408 | 100161709 |   |   | + |   |   | 1 |        |          | PRDM13  |        |
| chr6 | 100173127 | 100173998 | + |   |   | + | + | 3 |        |          |         | PRDM13 |
| chr6 | 101001729 | 101001967 | + |   | + |   |   | 2 |        |          | SIM1    |        |
| chr6 | 101002495 | 101002783 | + |   | + |   |   | 2 |        |          | SIM1    |        |
| chr6 | 101003802 | 101004342 | + |   | + | + |   | 3 |        |          | SIM1    |        |
| chr6 | 101010213 | 101010434 | + |   |   | + |   | 2 |        |          | SIM1    |        |
| chr6 | 101015932 | 101016165 |   |   | + |   |   | 1 |        |          | SIM1    |        |
| chr6 | 101018793 | 101020058 | + |   | + | + |   | 3 | SIM1   |          |         |        |
| chr6 | 101022324 | 101022604 |   |   | + |   |   | 1 | SIM1   |          |         |        |
| chr6 | 101023927 | 101024244 |   |   | + |   |   | 1 | SIM1   |          |         |        |
| chr6 | 101953488 | 101953856 | + | + | + | + | + | 5 |        | GRIK2    |         |        |
| chr6 | 101956528 | 101957695 | + |   |   | + | + | 3 |        |          | GRIK2   |        |
| chr6 | 105507571 | 105507842 | + |   |   | + |   | 2 | LIN28B |          |         |        |
| chr6 | 106535805 | 106536465 |   | + | + |   | + | 3 |        |          |         |        |
| chr6 | 106540678 | 106541152 |   |   |   | + |   | 1 |        |          |         |        |
| chr6 | 106548680 | 106549605 |   |   | + |   |   | 1 |        |          |         |        |
| chr6 | 108544692 | 108547901 |   |   | + | + |   | 2 |        |          |         |        |
| chr6 | 108585217 | 108586251 |   |   | + |   |   | 1 | NR2E1  |          |         |        |
| chr6 | 108592365 | 108597232 | + | + | + | + | + | 5 |        | NR2E1    |         |        |
| chr6 | 108602348 | 108602679 | + | + | + |   | + | 4 |        |          | NR2E1   |        |
| chr6 | 117192433 | 117193635 |   |   |   | + |   | 1 |        | C6orf189 |         |        |
| chr6 | 117693176 | 117693849 |   |   | + | + |   | 2 |        | VGLL2    |         |        |
| chr6 | 118348041 | 118348262 |   |   |   | + |   | 1 |        |          | SLC35F1 |        |
| chr6 | 127705886 | 127706448 |   |   |   |   | + | 1 |        | ECHDC1   |         |        |
| chr6 | 133603780 | 133605279 |   |   | + | + |   | 2 |        | EYA4     |         |        |
| chr6 | 134258613 | 134258973 |   |   |   | + | + | 2 |        |          |         | TCF21  |
| chr6 | 137851036 | 137851897 | + |   |   |   |   | 1 |        |          |         | OLIG3  |
| chr6 | 137859861 | 137861065 |   |   | + |   |   | 1 | OLIG3  |          |         |        |
| chr6 | 142451167 | 142451805 |   |   | + | + |   | 2 |        | NMBR     |         |        |
| chr6 | 146392216 | 146392473 |   |   | + | + |   | 2 |        |          | GRM1    |        |
| chr6 | 146797169 | 146797594 |   |   |   | + | + | 2 |        |          | GRM1    |        |
| chr6 | 146961728 | 146961938 |   |   |   | + |   | 1 |        |          |         |        |

|      |           |           |   |   |   |   |   |  |   |         |         |           |        |
|------|-----------|-----------|---|---|---|---|---|--|---|---------|---------|-----------|--------|
| chr6 | 151856674 | 151857220 |   |   |   |   | + |  | 1 |         | C6orf97 |           |        |
| chr6 | 152664973 | 152665173 |   |   | + |   |   |  | 1 |         |         | SYNE1     |        |
| chr6 | 154402280 | 154402701 |   |   |   | + |   |  | 1 |         |         | OPRM1     |        |
| chr6 | 159573224 | 159575387 |   |   | + | + |   |  | 2 |         |         | FNDC1     |        |
| chr6 | 166321517 | 166322649 |   |   |   | + |   |  | 1 |         |         | LOC441177 |        |
| chr6 | 166341882 | 166342231 |   |   | + | + |   |  | 2 |         |         |           |        |
| chr6 | 166499964 | 166503413 |   |   | + |   |   |  | 1 |         | T       |           |        |
| chr7 | 1230023   | 1230890   |   |   | + |   |   |  | 1 | UNCX4.1 |         | LOC641901 |        |
| chr7 | 1235692   | 1249390   |   |   | + |   |   |  | 1 |         |         | UNCX4.1   |        |
| chr7 | 1503148   | 1504015   |   |   | + |   |   |  | 1 |         |         | INTS1     |        |
| chr7 | 2026434   | 2026657   |   |   | + |   |   |  | 1 |         |         | MAD1L1    |        |
| chr7 | 2082894   | 2083307   |   |   | + |   |   |  | 1 |         |         | MAD1L1    |        |
| chr7 | 2740971   | 2741181   |   |   | + |   |   |  | 1 |         |         | GNA12     |        |
| chr7 | 4753288   | 4753513   |   |   | + |   |   |  | 1 |         |         | FOXK1     |        |
| chr7 | 4867863   | 4868279   | + | + |   |   |   |  | 2 |         | PAPOLB  | FLJ10324  |        |
| chr7 | 8439665   | 8441724   |   |   |   | + |   |  | 1 |         | NXPH1   |           |        |
| chr7 | 8448500   | 8449287   | + |   | + | + | + |  | 4 |         |         | NXPH1     |        |
| chr7 | 8449658   | 8450236   | + |   |   | + |   |  | 2 |         |         | NXPH1     |        |
| chr7 | 12409689  | 12410230  |   |   |   | + |   |  | 1 |         |         |           |        |
| chr7 | 16592674  | 16593056  |   |   | + |   |   |  | 1 |         |         |           |        |
| chr7 | 19112398  | 19112781  | + |   |   | + | + |  | 3 |         |         |           | TWIST1 |
| chr7 | 19113449  | 19113833  |   |   | + | + | + |  | 3 |         |         |           | TWIST1 |
| chr7 | 19118492  | 19118872  | + |   | + | + | + |  | 4 |         |         |           | TWIST1 |
| chr7 | 20782765  | 20783065  | + |   | + |   |   |  | 2 |         |         |           | SP8    |
| chr7 | 20789833  | 20792187  |   |   | + |   |   |  | 1 |         |         | SP8       |        |
| chr7 | 20797093  | 20797342  |   |   | + |   |   |  | 1 | SP8     |         |           |        |
| chr7 | 23212082  | 23212686  | + | + |   |   |   |  | 2 |         |         |           | NUPL2  |
| chr7 | 25864763  | 25865296  | + | + | + | + |   |  | 4 |         |         |           |        |
| chr7 | 27094026  | 27094893  | + | + | + | + |   |  | 4 |         |         |           | HOXA1  |
| chr7 | 27100623  | 27100828  | + |   |   |   |   |  | 1 |         |         | HOXA1     | HOXA2  |
| chr7 | 27101868  | 27103261  |   |   | + |   |   |  | 1 |         | HOXA1   |           | HOXA2  |
| chr7 | 27112595  | 27113125  | + | + | + | + |   |  | 4 | HOXA2   |         | HOXA3     |        |
| chr7 | 27121525  | 27121951  | + |   |   |   |   |  | 1 | HOXA3   |         | HOXA3     |        |
| chr7 | 27149139  | 27152087  |   | + | + | + |   |  | 3 |         | HOXA5   | HOXA6     | HOXA7  |
| chr7 | 27164708  | 27165039  |   |   | + |   |   |  | 1 | HOXA7   |         |           | HOXA9  |
| chr7 | 27170441  | 27172987  | + | + | + | + | + |  | 5 | HOXA7   | HOXA9   |           | HOXA10 |

|      |          |          |   |   |   |   |   |   |        |          |           |        |
|------|----------|----------|---|---|---|---|---|---|--------|----------|-----------|--------|
| chr7 | 27178942 | 27180921 |   |   | + |   |   | 1 | HOXA9  | HOXA10   |           | HOXA11 |
| chr7 | 27191576 | 27192154 |   |   | + |   |   | 1 | HOXA11 |          |           |        |
| chr7 | 27198331 | 27199622 | + | + |   |   |   | 2 | HOXA11 |          |           | HOXA13 |
| chr7 | 27211056 | 27211822 |   | + |   | + | + | 3 | HOXA13 |          |           |        |
| chr7 | 27219207 | 27220360 | + | + | + | + | + | 5 |        |          |           |        |
| chr7 | 27226627 | 27226992 | + | + |   |   |   | 2 |        |          |           |        |
| chr7 | 27245471 | 27245994 |   | + | + |   | + | 3 | EVX1   |          |           |        |
| chr7 | 27251165 | 27252762 | + |   |   |   |   | 1 |        |          | EVX1      |        |
| chr7 | 27257645 | 27258722 | + |   | + |   |   | 2 |        |          |           | EVX1   |
| chr7 | 29572353 | 29572815 |   |   |   | + |   | 1 |        |          | LOC222171 |        |
| chr7 | 30687898 | 30688970 |   |   | + |   |   | 1 |        | CRHR2    |           |        |
| chr7 | 35259511 | 35261199 |   |   | + | + |   | 2 |        | TBX20    |           |        |
| chr7 | 35263447 | 35264743 | + |   | + | + |   | 3 | TBX20  |          |           |        |
| chr7 | 35267676 | 35268256 | + |   | + |   |   | 2 | TBX20  |          |           |        |
| chr7 | 35460739 | 35461227 | + |   | + | + |   | 3 |        |          |           |        |
| chr7 | 38982069 | 38982454 |   |   |   | + |   | 1 |        |          |           |        |
| chr7 | 39615779 | 39616035 |   | + | + |   |   | 2 |        |          |           |        |
| chr7 | 42234072 | 42234348 | + |   |   | + |   | 2 |        |          | GLI3      |        |
| chr7 | 44315637 | 44316241 |   | + |   |   | + | 2 |        |          | CAMK2B    |        |
| chr7 | 45579912 | 45582029 |   |   | + |   |   | 1 |        | ADCY1    |           |        |
| chr7 | 49783555 | 49786298 |   |   | + |   |   | 1 |        | VWC2     |           |        |
| chr7 | 54579819 | 54580052 | + |   | + |   |   | 2 |        |          | MGC33530  |        |
| chr7 | 55484366 | 55484743 | + |   |   |   |   | 1 |        |          |           |        |
| chr7 | 56264927 | 56265156 | + |   | + | + |   | 3 |        |          |           |        |
| chr7 | 57274790 | 57275406 |   |   | + |   |   | 1 |        |          |           |        |
| chr7 | 62151951 | 62152418 |   |   | + |   |   | 1 |        |          |           |        |
| chr7 | 62998562 | 62998928 |   |   | + | + |   | 2 |        |          |           |        |
| chr7 | 63986860 | 63987586 | + |   |   |   |   | 1 |        |          |           |        |
| chr7 | 64349649 | 64350221 |   |   |   | + |   | 1 |        |          |           |        |
| chr7 | 75983333 | 75983717 | + | + |   |   |   | 2 |        |          | UPK3B     |        |
| chr7 | 77507607 | 77507993 | + |   |   |   |   | 1 |        |          | MAGI2     |        |
| chr7 | 78920885 | 78921786 |   |   |   | + |   | 1 | MAGI2  |          |           |        |
| chr7 | 87067488 | 87067826 |   |   |   | + |   | 1 |        |          | ABCB1     |        |
| chr7 | 87094895 | 87096380 |   |   |   | + |   | 1 |        | RPIB9    | ABCB1     |        |
| chr7 | 88226425 | 88227219 |   |   |   | + |   | 1 |        | FLJ32110 |           |        |
| chr7 | 94122795 | 94124463 |   |   | + |   |   | 1 |        | PEG10    |           |        |

|      |           |           |   |   |   |   |   |  |   |           |       |          |           |
|------|-----------|-----------|---|---|---|---|---|--|---|-----------|-------|----------|-----------|
| chr7 | 95063440  | 95064130  |   |   |   | + |   |  | 1 |           | PDK4  |          |           |
| chr7 | 96469320  | 96469736  | + | + | + | + |   |  | 4 | DLX6      |       |          |           |
| chr7 | 96472559  | 96472851  |   |   | + |   |   |  | 1 | DLX6      |       |          |           |
| chr7 | 96488158  | 96489487  | + | + | + | + |   |  | 4 |           |       | DLX5     | DLX6      |
| chr7 | 96489900  | 96490182  |   |   | + | + |   |  | 2 |           |       | DLX5     |           |
| chr7 | 97199069  | 97200954  | + |   | + | + |   |  | 3 |           | TAC1  |          |           |
| chr7 | 97638717  | 97638966  |   |   | + |   |   |  | 1 |           |       | LMTK2    |           |
| chr7 | 97672580  | 97673129  |   |   | + |   |   |  | 1 | BHLHB8    |       | LMTK2    |           |
| chr7 | 98083742  | 98085695  |   |   | + |   |   |  | 1 |           | NPTX2 |          |           |
| chr7 | 98388737  | 98389029  |   |   | + |   |   |  | 1 |           |       | TRRAP    |           |
| chr7 | 98390683  | 98390898  |   |   | + |   |   |  | 1 |           |       | TRRAP    |           |
| chr7 | 98417376  | 98417576  |   |   | + |   |   |  | 1 |           |       | TRRAP    |           |
| chr7 | 98446930  | 98447158  |   |   | + |   |   |  | 1 |           |       | TRRAP    |           |
| chr7 | 98447606  | 98447995  |   |   | + |   |   |  | 1 |           |       | TRRAP    |           |
| chr7 | 98471028  | 98471240  |   |   | + |   |   |  | 1 |           |       | SMURF1   |           |
| chr7 | 100056448 | 100056659 |   |   | + |   |   |  | 1 |           |       | TFR2     | MOSPD3    |
| chr7 | 100322362 | 100322587 |   |   | + |   |   |  | 1 |           |       | ARS2     | UFSP1     |
| chr7 | 101346123 | 101346345 |   |   | + |   |   |  | 1 |           |       | CUTL1    |           |
| chr7 | 101625452 | 101626317 |   |   | + |   |   |  | 1 |           |       | CUTL1    |           |
| chr7 | 101669315 | 101669715 |   |   | + |   |   |  | 1 |           |       | CUTL1    |           |
| chr7 | 104411574 | 104412084 |   |   | + |   |   |  | 1 |           |       |          |           |
| chr7 | 116750078 | 116752039 |   |   |   | + |   |  | 1 |           | WNT2  |          |           |
| chr7 | 121727243 | 121727884 | + | + | + |   | + |  | 4 |           |       |          | LOC389549 |
| chr7 | 121737486 | 121738163 |   | + | + | + | + |  | 4 | LOC389549 |       |          | CADPS2    |
| chr7 | 121743780 | 121744577 | + | + | + | + | + |  | 5 |           |       |          | CADPS2    |
| chr7 | 126678537 | 126681441 |   |   | + |   |   |  | 1 | GRM8      |       |          |           |
| chr7 | 127698097 | 127698498 | + | + |   | + | + |  | 4 |           |       |          |           |
| chr7 | 129205523 | 129209745 |   |   | + |   |   |  | 1 |           |       |          |           |
| chr7 | 129210234 | 129210591 | + | + | + |   | + |  | 4 |           |       |          |           |
| chr7 | 136204395 | 136206734 |   |   |   | + |   |  | 1 |           | CHRM2 | CHRM2    |           |
| chr7 | 143213059 | 143213543 | + |   | + |   |   |  | 2 |           |       | KIAA0738 |           |
| chr7 | 147667428 | 147667781 |   |   |   | + |   |  | 1 |           |       | CNTNAP2  |           |
| chr7 | 149020588 | 149020909 | + |   | + | + |   |  | 3 |           |       |          |           |
| chr7 | 151694768 | 151695013 | + |   |   |   |   |  | 1 |           |       | MLL3     |           |
| chr7 | 152222392 | 152222639 |   |   |   | + |   |  | 1 |           |       |          |           |
| chr7 | 153214251 | 153216599 | + | + | + | + | + |  | 5 |           | DPP6  |          |           |

|      |           |           |   |   |   |   |   |  |   |        |        |        |       |
|------|-----------|-----------|---|---|---|---|---|--|---|--------|--------|--------|-------|
| chr7 | 154492731 | 154493007 |   |   |   | + |   |  | 1 | HTR5A  |        |        |       |
| chr7 | 154493614 | 154494178 | + |   |   | + |   |  | 2 |        |        | HTR5A  |       |
| chr7 | 154857319 | 154860615 | + | + | + | + | + |  | 5 |        |        |        |       |
| chr7 | 154951589 | 154954164 | + |   |   |   |   |  | 1 |        |        |        | EN2   |
| chr7 | 154995015 | 154995919 | + |   | + | + |   |  | 3 |        |        |        |       |
| chr7 | 155018573 | 155019118 |   |   |   | + |   |  | 1 |        |        |        |       |
| chr7 | 155288454 | 155292175 | + | + |   |   |   |  | 2 |        |        | SHH    |       |
| chr7 | 156488117 | 156492155 |   |   | + |   |   |  | 1 |        |        | HLXB9  |       |
| chr7 | 156503334 | 156507354 | + |   | + | + |   |  | 3 | HLXB9  |        |        |       |
| chr7 | 157061882 | 157062155 |   |   |   | + |   |  | 1 |        |        | PTPRN2 |       |
| chr7 | 157689404 | 157689788 | + |   | + | + |   |  | 3 |        |        | PTPRN2 |       |
| chr8 | 676831    | 679496    |   |   | + |   |   |  | 1 | ERICH1 |        |        |       |
| chr8 | 1100466   | 1101480   | + |   | + | + |   |  | 3 |        |        |        |       |
| chr8 | 2406343   | 2406867   | + |   |   |   |   |  | 1 |        |        |        |       |
| chr8 | 4836377   | 4840043   |   |   | + |   |   |  | 1 |        | CSMD1  |        |       |
| chr8 | 8617962   | 8618624   |   |   | + |   |   |  | 1 |        |        |        |       |
| chr8 | 9798161   | 9799053   |   |   | + | + |   |  | 2 |        |        |        |       |
| chr8 | 9800072   | 9802158   |   |   | + | + |   |  | 2 |        |        |        |       |
| chr8 | 10624715  | 10628519  | + | + |   |   |   |  | 2 |        | SOX7   |        |       |
| chr8 | 11574177  | 11576370  | + | + |   |   |   |  | 1 |        |        |        |       |
| chr8 | 11595262  | 11595661  | + |   | + |   |   |  | 2 | GATA4  |        |        |       |
| chr8 | 11597006  | 11600365  |   |   |   | + |   |  | 1 |        | GATA4  |        |       |
| chr8 | 11602627  | 11604621  | + |   | + |   |   |  | 2 |        |        | GATA4  |       |
| chr8 | 13033752  | 13034006  |   |   |   | + |   |  | 1 |        |        | DLC1   |       |
| chr8 | 13034462  | 13035285  |   |   |   | + |   |  | 1 |        | DLC1   |        |       |
| chr8 | 23618421  | 23621120  | + | + | + | + |   |  | 4 |        |        |        |       |
| chr8 | 23622801  | 23623623  | + | + | + | + |   |  | 4 |        |        |        |       |
| chr8 | 23627868  | 23628153  |   |   | + |   |   |  | 1 |        |        |        |       |
| chr8 | 24855619  | 24856062  |   | + |   | + |   |  | 1 |        |        |        | NEFL  |
| chr8 | 25955253  | 25955609  | + |   | + | + |   |  | 3 |        |        | EBF2   |       |
| chr8 | 25956480  | 25961759  | + |   | + | + |   |  | 3 |        | EBF2   |        |       |
| chr8 | 25965210  | 25965603  | + | + |   | + |   |  | 3 | EBF2   |        |        |       |
| chr8 | 26777560  | 26780483  |   | + | + | + |   |  | 2 |        | ADRA1A |        |       |
| chr8 | 38627457  | 38627905  | + |   | + |   |   |  | 2 |        |        |        |       |
| chr8 | 38950750  | 38951510  | + | + |   |   |   |  | 2 |        | HTRA4  |        |       |
| chr8 | 39084171  | 39084580  |   | + |   |   |   |  | 1 |        | ADAM32 |        | ADAM9 |

|      |          |          |   |   |   |   |   |   |         |           |           |         |
|------|----------|----------|---|---|---|---|---|---|---------|-----------|-----------|---------|
| chr8 | 41285010 | 41286297 |   |   | + |   |   | 1 |         | SFRP1     |           |         |
| chr8 | 41543499 | 41544457 | + |   |   |   |   | 1 |         |           |           |         |
| chr8 | 47648155 | 47648539 |   |   | + |   |   | 1 |         |           |           |         |
| chr8 | 53640098 | 53641180 |   |   |   | + |   | 1 |         | UNQ9433   |           |         |
| chr8 | 54014255 | 54016979 |   |   | + | + | + | 3 |         |           | NPBWR1    |         |
| chr8 | 54732221 | 54732563 | + | + |   | + |   | 3 |         |           |           |         |
| chr8 | 55528734 | 55530181 |   |   | + | + |   | 2 | SOX17   |           |           |         |
| chr8 | 55532724 | 55535078 | + |   | + | + |   | 3 |         | SOX17     |           |         |
| chr8 | 55541482 | 55542739 |   |   | + |   |   | 1 |         |           |           | SOX17   |
| chr8 | 55545193 | 55545742 | + |   |   | + |   | 2 |         |           |           | SOX17   |
| chr8 | 57188101 | 57189097 |   |   | + | + | + | 3 |         | MOS       |           |         |
| chr8 | 57192751 | 57193438 | + |   | + |   |   | 2 | MOS     |           |           |         |
| chr8 | 57520681 | 57521969 |   |   | + | + |   | 2 |         | PENK      |           |         |
| chr8 | 58217500 | 58218154 | + |   | + | + |   | 3 |         |           |           |         |
| chr8 | 58218515 | 58218798 | + |   |   |   |   | 1 |         |           |           |         |
| chr8 | 59220722 | 59221968 |   |   |   | + |   | 1 |         |           | C8orf72   |         |
| chr8 | 63323153 | 63324618 |   |   |   | + |   | 1 |         | FAM77D    |           |         |
| chr8 | 65653638 | 65653873 |   |   |   | + |   | 1 | BHLHB5  |           |           |         |
| chr8 | 65662303 | 65662699 | + |   | + | + |   | 3 |         |           |           | CYP7B1  |
| chr8 | 67507052 | 67507543 |   |   |   | + | + | 2 |         | ADHFE1    |           | RRS1    |
| chr8 | 68035943 | 68038154 | + |   | + |   |   | 2 |         |           |           |         |
| chr8 | 68103246 | 68103551 |   | + | + |   | + | 3 |         | LOC286187 |           |         |
| chr8 | 71109445 | 71109853 | + |   | + | + |   | 3 |         |           |           |         |
| chr8 | 71144428 | 71147442 | + |   | + | + | + | 4 |         | PRDM14    |           |         |
| chr8 | 72631115 | 72632115 | + | + | + | + |   | 4 |         |           |           |         |
| chr8 | 72916429 | 72917309 | + |   | + | + | + | 4 |         |           | MSC       |         |
| chr8 | 73326173 | 73326745 |   |   | + | + |   | 2 |         |           |           |         |
| chr8 | 82705354 | 82706030 |   | + |   |   |   | 1 |         |           |           |         |
| chr8 | 85259315 | 85259802 | + |   | + |   |   | 2 |         |           | LOC138046 |         |
| chr8 | 86538018 | 86538448 | + |   | + |   |   | 2 |         |           | CA3       |         |
| chr8 | 87150770 | 87151162 | + |   | + | + |   | 3 |         | PSKH2     |           |         |
| chr8 | 89409082 | 89409597 |   |   | + |   |   | 1 | MMP16   |           |           |         |
| chr8 | 92066407 | 92067082 |   |   | + |   |   | 1 |         |           |           | TMEM55A |
| chr8 | 93183233 | 93185155 |   |   |   | + |   | 1 | RUNX1T1 |           |           |         |
| chr8 | 96154446 | 96154923 | + |   | + |   |   | 2 |         |           |           |         |
| chr8 | 97240982 | 97241198 |   |   | + |   |   | 1 |         |           | GDF6      |         |

|      |           |           |   |   |   |   |   |   |           |         |           |         |
|------|-----------|-----------|---|---|---|---|---|---|-----------|---------|-----------|---------|
| chr8 | 98857012  | 98858050  |   |   |   |   | + | 1 |           |         | LAPTM4B   |         |
| chr8 | 100053761 | 100054248 | + |   | + | + |   | 3 |           |         |           |         |
| chr8 | 100054910 | 100056159 | + | + | + | + | + | 5 |           |         |           |         |
| chr8 | 104452586 | 104453285 | + |   |   |   |   | 1 |           | CTHRC1  |           |         |
| chr8 | 105411390 | 105411734 | + |   |   | + |   | 2 | TM7SF4    |         |           |         |
| chr8 | 105448743 | 105449162 | + |   |   |   |   | 1 |           |         |           |         |
| chr8 | 109163662 | 109165025 |   |   | + |   |   | 1 |           | RSPO2   |           |         |
| chr8 | 114514003 | 114514261 |   |   | + |   |   | 1 |           |         | CSMD3     |         |
| chr8 | 116729607 | 116729921 | + |   |   |   |   | 1 |           |         | TRPS1     |         |
| chr8 | 120033128 | 120033359 |   |   |   |   | + | 1 |           |         | TNFRSF11B |         |
| chr8 | 120033571 | 120033818 |   |   |   |   | + | 1 | TNFRSF11B |         |           |         |
| chr8 | 121206281 | 121207102 |   |   |   | + | + | 2 |           | COL14A1 |           |         |
| chr8 | 127637859 | 127640055 |   |   | + |   |   | 1 |           | FAM84B  |           |         |
| chr8 | 132121386 | 132123931 |   |   | + | + |   | 2 |           | ADCY8   |           |         |
| chr8 | 141628347 | 141628550 |   |   | + |   |   | 1 |           |         | EIF2C2    |         |
| chr8 | 144403741 | 144404118 |   |   | + |   |   | 1 |           |         | ZFP41     |         |
| chr8 | 144963726 | 144964014 |   |   | + |   |   | 1 |           |         | SCRIB     | SIAHBP1 |
| chr8 | 145175274 | 145180015 |   |   | + |   |   | 1 |           |         | OPLAH     | SPATC1  |
| chr8 | 145235057 | 145237455 | + |   |   |   |   | 1 | SHARPIN   |         |           | MAF1    |
| chr8 | 145608774 | 145609990 | + |   |   |   |   | 1 | CPSF1     |         | SLC39A4   | VPS28   |
| chr8 | 145909302 | 145910517 |   |   | + |   |   | 1 |           |         |           |         |
| chr9 | 697022    | 697420    |   |   |   |   | + | 1 |           |         | ANKRD15   |         |
| chr9 | 959530    | 963276    | + | + | + | + | + | 5 | DMRT3     |         |           | DMRT1   |
| chr9 | 1035542   | 1036394   | + | + | + |   | + | 4 | DMRT2     |         |           |         |
| chr9 | 6705977   | 6706503   |   |   |   | + |   | 1 |           |         |           |         |
| chr9 | 14338685  | 14339074  | + |   |   |   | + | 2 |           |         |           |         |
| chr9 | 19778216  | 19779288  |   |   |   | + |   | 1 | SLC24A2   |         |           |         |
| chr9 | 21021514  | 21021823  |   |   |   |   | + | 1 |           | PTPLAD2 |           |         |
| chr9 | 21392502  | 21393058  |   |   | + |   | + | 2 | IFNA8     |         |           |         |
| chr9 | 21955097  | 21955747  |   |   |   |   | + | 1 |           |         |           | CDKN2A  |
| chr9 | 21958359  | 21958728  |   |   | + | + | + | 3 |           |         | CDKN2A    |         |
| chr9 | 21979774  | 21980108  |   |   |   | + |   | 1 |           |         | CDKN2A    |         |
| chr9 | 23810692  | 23812135  |   |   | + |   | + | 2 |           |         | ELAVL2    |         |
| chr9 | 23812413  | 23812667  |   |   | + |   |   | 1 |           |         | ELAVL2    |         |
| chr9 | 23840911  | 23841522  |   |   |   | + |   | 1 |           |         |           |         |
| chr9 | 29204697  | 29204934  |   |   | + | + |   | 2 |           |         |           |         |

|       |           |           |   |   |   |   |   |   |           |  |           |        |           |
|-------|-----------|-----------|---|---|---|---|---|---|-----------|--|-----------|--------|-----------|
| chr9  | 32945652  | 32946278  | + |   |   |   |   | 1 |           |  |           |        |           |
| chr9  | 36992490  | 36992957  | + |   | + | + |   | 3 |           |  |           | PAX5   |           |
| chr9  | 37777075  | 37777609  | + |   | + |   |   | 2 | EXOSC3    |  |           |        | RG9MTD3   |
| chr9  | 78818731  | 78819213  | + |   | + | + |   | 3 | LOC442425 |  |           |        |           |
| chr9  | 78819686  | 78819904  | + | + |   | + |   | 3 | LOC442425 |  |           |        |           |
| chr9  | 78820789  | 78821569  | + |   | + | + |   | 3 | LOC442425 |  |           |        |           |
| chr9  | 78827635  | 78827989  | + |   | + | + |   | 3 |           |  |           |        | LOC442425 |
| chr9  | 86472999  | 86475524  |   |   | + |   |   | 1 |           |  | NTRK2     |        |           |
| chr9  | 87327430  | 87327805  |   | + |   |   |   | 1 |           |  |           |        |           |
| chr9  | 92919547  | 92920439  | + |   |   |   |   | 1 |           |  |           |        |           |
| chr9  | 92995322  | 92996241  |   | + |   |   |   | 1 |           |  |           |        |           |
| chr9  | 93688475  | 93688785  | + | + |   |   |   | 2 |           |  |           | ROR2   |           |
| chr9  | 93702387  | 93702639  | + |   |   |   |   | 1 |           |  |           | ROR2   |           |
| chr9  | 95753148  | 95758007  | + |   |   |   |   | 1 |           |  | BARX1     |        |           |
| chr9  | 95760408  | 95763010  |   | + |   |   |   | 1 | BARX1     |  |           |        |           |
| chr9  | 99650518  | 99651338  |   |   |   | + |   | 1 | FOXE1     |  |           |        |           |
| chr9  | 99659806  | 99660013  |   |   |   | + |   | 1 |           |  |           |        | FOXE1     |
| chr9  | 99889521  | 99890213  | + |   |   |   |   | 1 |           |  |           | TRIM14 | NANS      |
| chr9  | 102830434 | 102831585 |   |   |   | + |   | 1 |           |  | PRG-3     |        |           |
| chr9  | 119215075 | 119217317 |   |   |   | + |   | 1 |           |  | ASTN2     |        |           |
| chr9  | 119547049 | 119547463 |   |   |   | + |   | 1 |           |  |           |        |           |
| chr9  | 121170908 | 121172035 |   |   |   | + |   | 1 |           |  | DBC1      |        |           |
| chr9  | 125813068 | 125820774 | + | + | + | + | + | 5 |           |  | LHX2      |        |           |
| chr9  | 128024685 | 128025102 |   |   |   | + |   | 1 |           |  |           |        |           |
| chr9  | 128425934 | 128429052 |   |   |   | + | + | 2 |           |  |           | LMX1B  |           |
| chr9  | 131239183 | 131239805 |   |   |   | + |   | 1 |           |  |           |        |           |
| chr9  | 132402712 | 132402917 |   | + |   |   |   | 1 |           |  |           |        |           |
| chr9  | 138377664 | 138378896 |   |   |   | + |   | 1 |           |  | LOC728489 | CARD9  | GPSM1     |
| chr10 | 2533464   | 2534121   |   |   |   | + |   | 1 |           |  |           |        |           |
| chr10 | 7489383   | 7495345   | + | + | + | + |   | 4 |           |  | SFMBT2    |        |           |
| chr10 | 8117836   | 8118384   |   |   |   | + | + | 2 |           |  |           |        |           |
| chr10 | 8131381   | 8138335   | + |   |   | + |   | 2 |           |  | GATA3     |        |           |
| chr10 | 11247185  | 11247986  |   |   |   | + |   | 1 |           |  |           | CUGBP2 |           |
| chr10 | 16601611  | 16603828  |   |   |   | + |   | 1 |           |  |           | C1QL3  | PTER      |
| chr10 | 21823205  | 21826426  | + |   |   |   |   | 1 |           |  | C10orf114 |        |           |
| chr10 | 21828640  | 21829594  | + | + | + |   |   | 3 | C10orf114 |  |           |        |           |



|       |           |           |   |   |   |   |   |   |           |         |           |        |
|-------|-----------|-----------|---|---|---|---|---|---|-----------|---------|-----------|--------|
| chr10 | 22663357  | 22665881  | + | + | + |   | + | 4 | SPAG6     |         |           | PCGF4  |
| chr10 | 22804715  | 22807056  | + |   | + |   | + | 3 |           |         |           |        |
| chr10 | 23502231  | 23503895  | + |   | + |   |   | 2 |           |         |           |        |
| chr10 | 23523904  | 23524504  | + |   | + | + |   | 3 |           |         |           | PTF1A  |
| chr10 | 25503763  | 25505645  |   |   |   | + |   | 1 |           | GPR158  |           |        |
| chr10 | 26540614  | 26541132  | + |   | + | + |   | 3 | GAD2      |         | MYO3A     |        |
| chr10 | 28070189  | 28075217  | + |   | + | + |   | 3 |           | IRXL1   |           |        |
| chr10 | 37980429  | 37980680  |   |   | + |   |   | 1 |           |         |           |        |
| chr10 | 38109593  | 38109952  |   |   | + |   |   | 1 |           |         |           |        |
| chr10 | 42568530  | 42570918  |   |   | + |   |   | 1 |           |         |           |        |
| chr10 | 42713483  | 42714423  |   |   |   | + |   | 1 |           |         |           |        |
| chr10 | 42748174  | 42749466  | + |   |   |   |   | 1 |           |         |           |        |
| chr10 | 43482857  | 43483537  |   |   | + |   |   | 1 |           |         |           |        |
| chr10 | 43505046  | 43506138  |   |   |   | + |   | 1 |           |         |           |        |
| chr10 | 45039719  | 45040209  |   |   | + |   |   | 1 |           |         |           |        |
| chr10 | 50272996  | 50276789  |   |   |   | + |   | 1 | LOC644168 |         |           |        |
| chr10 | 62882502  | 62883015  |   |   |   | + | + | 2 |           |         | TMEM26    |        |
| chr10 | 76825135  | 76839606  | + |   |   |   |   | 1 |           | ZNF503  | LOC439985 |        |
| chr10 | 85987090  | 85987407  |   |   | + |   |   | 1 | RGR       |         | LRRC21    |        |
| chr10 | 88139247  | 88139718  |   |   | + |   |   | 1 |           |         |           |        |
| chr10 | 88286151  | 88286599  | + |   | + |   |   | 2 |           |         |           |        |
| chr10 | 93637033  | 93637373  |   |   | + |   |   | 1 |           |         |           |        |
| chr10 | 94170296  | 94170734  | + | + | + | + | + | 5 |           |         |           |        |
| chr10 | 94441310  | 94441717  | + |   | + |   |   | 2 |           |         | HHEX      |        |
| chr10 | 94442181  | 94442408  |   |   | + |   |   | 1 |           |         | HHEX      |        |
| chr10 | 94810017  | 94813242  |   |   | + |   |   | 1 | CYP26A1   | CYP26C1 |           | EXOC6  |
| chr10 | 94823263  | 94825246  |   |   | + | + |   | 2 |           | CYP26A1 |           |        |
| chr10 | 101271172 | 101272106 |   |   |   | + |   | 1 |           |         |           |        |
| chr10 | 101280016 | 101280328 | + |   | + |   |   | 2 | NKX2-3    |         |           |        |
| chr10 | 101280616 | 101281168 |   |   | + |   |   | 1 | NKX2-3    |         |           |        |
| chr10 | 101283006 | 101283228 |   |   | + | + |   | 2 |           |         | NKX2-3    |        |
| chr10 | 101284434 | 101287253 | + |   | + |   |   | 2 |           |         | NKX2-3    |        |
| chr10 | 102269153 | 102269720 |   |   | + |   |   | 1 |           | SEC31L2 |           | NDUFB8 |
| chr10 | 102409138 | 102409658 | + |   | + | + |   | 3 |           |         |           |        |
| chr10 | 102493904 | 102496136 |   |   | + |   |   | 1 |           | PAX2    |           |        |
| chr10 | 102497473 | 102499636 |   |   |   | + |   | 1 |           |         | PAX2      |        |

|       |           |           |   |   |   |   |   |   |        |          |          |         |
|-------|-----------|-----------|---|---|---|---|---|---|--------|----------|----------|---------|
| chr10 | 102886333 | 102886655 | + |   |   |   |   | 1 | TD1    |          | TLX1     |         |
| chr10 | 102972293 | 102973618 | + |   |   |   |   | 1 |        |          |          | LBX1    |
| chr10 | 102974173 | 102980053 |   |   | + |   |   | 1 |        | LBX1     |          |         |
| chr10 | 106389558 | 106392802 |   |   | + | + |   | 2 |        | SORCS3   |          |         |
| chr10 | 112392944 | 112394318 |   |   | + |   |   | 1 |        |          |          |         |
| chr10 | 118020723 | 118024220 |   |   |   | + |   | 1 |        | GFRA1    |          |         |
| chr10 | 118358570 | 118359414 |   |   |   | + |   | 1 |        |          | PNLIPRP1 |         |
| chr10 | 118882152 | 118882629 | + | + | + | + | + | 5 |        |          | VAX1     |         |
| chr10 | 118883518 | 118884422 |   |   | + |   |   | 1 |        |          | VAX1     |         |
| chr10 | 118889238 | 118890319 | + |   | + |   |   | 2 | VAX1   |          |          |         |
| chr10 | 119291312 | 119295358 |   |   | + |   |   | 1 |        | EMX2     |          |         |
| chr10 | 119301195 | 119302094 |   |   |   | + |   | 1 |        |          |          | EMX2    |
| chr10 | 119484484 | 119484981 | + |   | + | + |   | 3 |        |          |          |         |
| chr10 | 120343683 | 120345811 | + |   | + | + |   | 3 |        | PRLHR    |          |         |
| chr10 | 122698501 | 122698889 | + |   | + |   |   | 2 |        |          |          |         |
| chr10 | 124568117 | 124568433 |   |   | + |   |   | 1 |        |          |          |         |
| chr10 | 124628734 | 124629783 |   |   |   |   | + | 1 |        | FAM24B   |          |         |
| chr10 | 124889695 | 124890067 |   |   | + |   |   | 1 | HMX2   |          |          |         |
| chr10 | 124895625 | 124896151 | + | + |   | + | + | 4 | HMX2   |          |          |         |
| chr10 | 124897274 | 124901025 | + |   | + |   |   | 2 | BUB3   |          | HMX2     |         |
| chr10 | 125722211 | 125722833 |   |   |   | + | + | 2 |        |          |          |         |
| chr10 | 129424401 | 129427356 |   |   | + |   |   | 1 |        | FLJ46831 |          |         |
| chr10 | 130229517 | 130229767 |   |   |   | + |   | 1 |        |          |          |         |
| chr10 | 131587070 | 131587402 | + |   |   | + |   | 2 |        |          | EBF3     |         |
| chr10 | 131651160 | 131661686 |   |   | + | + |   | 2 |        | EBF3     |          |         |
| chr10 | 134447348 | 134452639 |   | + |   | + |   | 2 |        | NKX6-2   |          | INPP5A  |
| chr11 | 6297022   | 6298485   | + |   |   |   |   | 1 |        | PRKCDBP  |          |         |
| chr11 | 6904097   | 6904788   |   |   |   | + |   | 1 |        | ZNF215   |          | OR2D3   |
| chr11 | 8146803   | 8147247   |   |   | + |   |   | 1 |        | RIC3     |          |         |
| chr11 | 14883048  | 14884346  | + |   |   |   |   | 1 |        |          |          |         |
| chr11 | 14950029  | 14950237  |   |   |   | + |   | 1 |        |          | CALCA    |         |
| chr11 | 15919459  | 15919799  | + |   | + | + |   | 3 |        |          |          |         |
| chr11 | 18433875  | 18434332  |   |   | + |   |   | 1 |        | LDHAL6A  |          | LDHC    |
| chr11 | 18683897  | 18684303  |   |   |   | + |   | 1 |        |          | IGSF22   | TMEM86A |
| chr11 | 20574774  | 20576496  |   |   | + |   |   | 1 | SLC6A5 |          |          |         |
| chr11 | 22170749  | 22171896  |   |   |   | + |   | 1 |        | TMEM16E  |          |         |

|       |           |           |   |   |   |   |   |   |        |        |         |         |
|-------|-----------|-----------|---|---|---|---|---|---|--------|--------|---------|---------|
| chr11 | 22319439  | 22319953  | + |   | + | + |   | 3 |        |        | SLC17A6 |         |
| chr11 | 22410877  | 22411094  |   |   | + |   |   | 1 |        |        |         |         |
| chr11 | 24474801  | 24475314  |   |   |   | + |   | 1 |        | LUZP2  |         |         |
| chr11 | 27700049  | 27701140  |   |   |   | + |   | 1 | BDNF   |        |         |         |
| chr11 | 30562135  | 30562376  |   |   | + |   | + | 2 | MPPED2 |        |         |         |
| chr11 | 30562581  | 30564704  |   |   | + |   |   | 1 | MPPED2 |        |         |         |
| chr11 | 31776637  | 31777992  | + |   | + | + | + | 4 |        |        | PAX6    |         |
| chr11 | 31782320  | 31783543  | + |   | + | + | + | 4 |        |        | PAX6    |         |
| chr11 | 31784273  | 31784497  |   |   | + |   |   | 1 |        |        | PAX6    |         |
| chr11 | 31788197  | 31795614  | + |   | + | + | + | 4 |        | PAX6   |         |         |
| chr11 | 31795940  | 31796389  |   |   | + |   |   | 1 | PAX6   |        |         |         |
| chr11 | 31797892  | 31798579  | + |   | + | + |   | 3 | PAX6   |        |         |         |
| chr11 | 31803709  | 31804534  |   |   | + |   |   | 1 |        |        |         |         |
| chr11 | 32404838  | 32406320  |   |   | + |   |   | 1 | WIT1   |        | WT1     |         |
| chr11 | 32408721  | 32409284  |   |   | + |   |   | 1 | WIT1   | WT1    |         |         |
| chr11 | 32411451  | 32413887  | + | + | + | + |   | 4 | WIT1   | WT1    |         |         |
| chr11 | 32415999  | 32416454  |   |   | + |   |   | 1 | WT1    | WIT1   |         |         |
| chr11 | 32417163  | 32417580  | + |   | + | + |   | 3 | WT1    |        | WIT1    |         |
| chr11 | 43553567  | 43553912  |   |   |   | + |   | 1 |        |        |         |         |
| chr11 | 43559122  | 43559791  |   |   | + | + |   | 2 |        |        |         |         |
| chr11 | 44281452  | 44281663  |   |   |   | + |   | 1 |        |        | ALX4    |         |
| chr11 | 44282234  | 44283093  | + |   | + |   |   | 2 |        |        | ALX4    |         |
| chr11 | 44283817  | 44284508  |   |   |   | + |   | 1 |        |        | ALX4    |         |
| chr11 | 50213832  | 50214348  |   |   | + |   |   | 1 |        |        |         |         |
| chr11 | 60376501  | 60377687  |   | + |   |   |   | 1 |        |        | GPR44   | CCDC86  |
| chr11 | 62233347  | 62234057  |   |   | + |   |   | 1 | BSCL2  |        |         | HNRPUL2 |
| chr11 | 63731406  | 63731624  |   |   | + |   |   | 1 |        |        | URP2    | STIP1   |
| chr11 | 64289513  | 64290339  |   |   | + |   |   | 1 | PYGM   |        | SF1     | SF1     |
| chr11 | 66167502  | 66168163  |   |   | + |   |   | 1 |        |        | RBM4    |         |
| chr11 | 68274244  | 68274755  | + | + |   |   |   | 2 |        |        | MTL5    | CPT1A   |
| chr11 | 69160318  | 69167777  |   |   |   |   | + | 1 |        | CCND1  |         |         |
| chr11 | 69392087  | 69392348  | + |   |   |   |   | 1 |        |        |         |         |
| chr11 | 76428341  | 76429426  | + |   |   |   |   | 1 |        |        | B3GNT6  |         |
| chr11 | 92342438  | 92343082  | + |   |   |   |   | 1 |        |        | MTNR1B  |         |
| chr11 | 94141015  | 94142344  |   |   |   |   | + | 1 |        | AMOTL1 |         |         |
| chr11 | 114878785 | 114881091 |   |   |   | + |   | 1 |        | IGSF4  |         |         |

|       |           |           |   |   |   |   |   |   |   |        |          |          |        |
|-------|-----------|-----------|---|---|---|---|---|---|---|--------|----------|----------|--------|
| chr11 | 115955870 | 115957122 |   |   |   | + |   |   | 1 |        |          |          |        |
| chr11 | 118732307 | 118732968 |   | + |   |   |   |   | 1 | MFRP   |          | USP2     |        |
| chr11 | 119118216 | 119118731 |   |   |   | + |   |   | 1 |        |          |          |        |
| chr11 | 122352705 | 122353818 | + |   | + | + |   |   | 3 |        |          | BSX1     |        |
| chr11 | 124240280 | 124241675 |   |   | + |   |   |   | 1 |        | ROBO3    |          |        |
| chr11 | 127924409 | 127924723 | + |   | + |   |   |   | 2 |        |          |          |        |
| chr12 | 1844001   | 1845219   | + |   | + |   |   |   | 2 |        |          | CACNA2D4 |        |
| chr12 | 2209424   | 2209876   |   |   | + |   |   |   | 1 |        |          | CACNA1C  |        |
| chr12 | 3470228   | 3473269   |   |   |   | + |   |   | 1 |        | PRMT8    |          |        |
| chr12 | 4888847   | 4891432   |   |   | + | + |   |   | 2 |        | KCNA1    |          |        |
| chr12 | 5411472   | 5413234   |   |   |   |   |   | + | 1 |        |          |          |        |
| chr12 | 6037135   | 6037519   |   |   | + |   |   |   | 1 |        |          | VWF      |        |
| chr12 | 6599510   | 6600571   | + |   |   |   |   |   | 1 |        |          | GPR92    |        |
| chr12 | 6728235   | 6728518   |   |   | + |   |   |   | 1 |        |          | MLF2     |        |
| chr12 | 15366586  | 15367168  |   |   | + |   |   |   | 1 |        | PTPRO    |          |        |
| chr12 | 21571676  | 21572249  |   |   |   | + |   |   | 1 |        |          | C12orf39 | GYS2   |
| chr12 | 21985222  | 21986624  |   |   | + | + |   |   | 2 | ABCC9  |          |          |        |
| chr12 | 24946867  | 24947513  | + |   | + |   |   | + | 3 |        |          | BCAT1    |        |
| chr12 | 24992875  | 24993340  |   |   |   |   |   | + | 1 |        |          | BCAT1    |        |
| chr12 | 37586737  | 37586947  |   |   |   | + |   |   | 1 | CPNE8  |          |          |        |
| chr12 | 37824651  | 37825767  | + |   | + | + |   |   | 3 |        |          |          |        |
| chr12 | 49522901  | 49523191  |   |   | + |   |   |   | 1 |        | TMPRSS12 |          |        |
| chr12 | 50401678  | 50401946  | + |   |   |   |   |   | 1 |        |          | SCN8A    |        |
| chr12 | 50686735  | 50687963  |   | + |   |   |   |   | 1 |        | GRASP    |          | ACVR1B |
| chr12 | 50930250  | 50930678  | + |   | + |   |   |   | 2 |        |          |          | KRT7   |
| chr12 | 50938286  | 50939010  | + |   |   |   |   |   | 1 |        |          |          | KRT7   |
| chr12 | 51281040  | 51281579  | + | + |   | + |   |   | 3 |        | K6IRS2   |          | K6IRS3 |
| chr12 | 52357321  | 52357532  |   | + |   | + | + |   | 3 | ATP5G2 |          |          |        |
| chr12 | 52607569  | 52607988  | + |   | + | + |   |   | 3 |        |          |          |        |
| chr12 | 52625029  | 52625435  | + |   |   | + |   |   | 2 | HOXC12 |          | HOXC13   |        |
| chr12 | 52646642  | 52646927  | + | + | + | + |   |   | 4 | HOXC11 |          |          |        |
| chr12 | 52653083  | 52655370  |   |   | + |   |   |   | 1 | HOXC10 | HOXC11   |          |        |
| chr12 | 52685680  | 52685921  |   |   |   | + |   |   | 1 | HOXC8  |          |          | HOXC9  |
| chr12 | 52694694  | 52694980  | + |   | + | + |   |   | 3 | HOXC6  |          |          | HOXC8  |
| chr12 | 52713293  | 52714976  | + |   |   | + |   |   | 2 |        |          | HOXC5    | HOXC6  |
| chr12 | 52726910  | 52727810  | + | + | + | + | + |   | 5 | HOXC4  |          | HOXC4    |        |

|       |           |           |   |   |   |   |   |   |   |       |          |          |          |
|-------|-----------|-----------|---|---|---|---|---|---|---|-------|----------|----------|----------|
| chr12 | 52732144  | 52732380  |   |   | + |   |   |   | 1 | HOXC4 |          | HOXC4    |          |
| chr12 | 54326256  | 54326604  | + |   |   |   |   |   | 1 |       |          |          | OR10P1   |
| chr12 | 55905037  | 55905669  | + |   |   |   |   |   | 1 | SHMT2 |          | NXPH4    |          |
| chr12 | 56307562  | 56308304  | + | + |   |   |   | + | 3 |       |          | B4GALNT1 | SLC26A10 |
| chr12 | 60871036  | 60872535  | + | + | + | + | + |   | 5 |       |          | FAM19A2  |          |
| chr12 | 61829904  | 61831234  |   |   |   |   | + |   | 1 |       |          | AVPR1A   |          |
| chr12 | 62501767  | 62502257  | + | + | + | + |   |   | 4 |       |          |          |          |
| chr12 | 64409056  | 64409595  | + |   | + |   |   |   | 2 |       |          |          |          |
| chr12 | 70951951  | 70953818  |   |   |   | + |   |   | 1 |       | TRHDE    |          |          |
| chr12 | 79626166  | 79626847  |   |   | + |   |   |   | 1 | MYF5  |          | MYF6     |          |
| chr12 | 79995701  | 79996250  |   |   |   | + |   |   | 1 |       | FLJ21963 |          |          |
| chr12 | 84198010  | 84198831  | + |   | + | + | + |   | 4 |       | CART1    |          |          |
| chr12 | 100560385 | 100560592 | + |   |   | + |   |   | 2 |       |          | MYBPC1   |          |
| chr12 | 102413279 | 102413973 |   |   |   | + |   |   | 1 |       | C12orf42 |          |          |
| chr12 | 103221479 | 103222114 | + |   | + |   |   |   | 2 |       | EID3     | TXNRD1   |          |
| chr12 | 105503560 | 105505216 |   |   |   | + |   |   | 1 |       |          | RFX4     |          |
| chr12 | 111497483 | 111497912 |   |   |   | + |   |   | 1 |       |          |          |          |
| chr12 | 112401778 | 112402490 | + |   | + | + |   |   | 3 | LHX5  |          |          |          |
| chr12 | 113322696 | 113323272 |   |   |   | + |   |   | 1 |       |          | TBX5     |          |
| chr12 | 113325237 | 113326112 | + |   |   |   |   |   | 1 |       | TBX5     |          |          |
| chr12 | 113327406 | 113327993 |   |   |   | + |   |   | 1 |       | TBX5     |          |          |
| chr12 | 113330245 | 113332033 | + |   | + | + |   |   | 3 |       | TBX5     |          |          |
| chr12 | 113366033 | 113366320 | + |   | + | + |   |   | 3 |       |          |          |          |
| chr12 | 113369489 | 113369801 |   |   |   | + | + |   | 2 |       |          |          |          |
| chr12 | 113593887 | 113594444 | + |   |   |   |   |   | 1 |       |          | TBX3     |          |
| chr12 | 113609113 | 113609535 | + |   |   | + |   |   | 2 | TBX3  |          |          |          |
| chr12 | 113620309 | 113620733 | + |   | + |   |   |   | 2 |       |          |          |          |
| chr12 | 113657998 | 113659205 |   |   |   | + |   |   | 1 |       |          |          |          |
| chr12 | 117696494 | 117696776 |   |   |   | + |   |   | 1 |       |          |          |          |
| chr12 | 124075523 | 124075768 |   |   |   | + |   |   | 1 |       |          | BRI3BP   |          |
| chr12 | 125778233 | 125778482 | + |   | + | + | + |   | 4 |       |          |          |          |
| chr12 | 126331230 | 126331468 |   |   |   |   | + |   | 1 |       |          |          |          |
| chr12 | 127316995 | 127319104 |   |   |   |   | + |   | 1 |       |          |          |          |
| chr12 | 128953563 | 128955092 |   |   |   | + | + |   | 2 |       | TMEM132D |          |          |
| chr12 | 129737122 | 129737501 | + |   |   |   |   |   | 1 |       |          |          |          |
| chr12 | 131994732 | 131995812 |   |   |   | + |   |   | 1 |       |          |          |          |

|       |           |           |   |   |   |   |   |   |           |         |         |         |
|-------|-----------|-----------|---|---|---|---|---|---|-----------|---------|---------|---------|
| chr13 | 19773519  | 19774214  | + |   |   |   |   | 1 |           |         |         |         |
| chr13 | 24404114  | 24404341  | + |   |   | + |   | 2 | CENPJ     |         |         |         |
| chr13 | 24772995  | 24774200  |   |   | + | + |   | 2 |           | NUPL1   |         |         |
| chr13 | 27389489  | 27390518  |   |   | + | + |   | 2 | PDX1      |         |         |         |
| chr13 | 27400363  | 27400744  |   |   |   | + |   | 1 |           |         |         | PDX1    |
| chr13 | 27438357  | 27441544  |   |   |   | + |   | 1 |           | CDX2    |         |         |
| chr13 | 27442525  | 27442890  | + | + | + | + |   | 4 | CDX2      |         |         |         |
| chr13 | 27452428  | 27453065  |   |   | + |   |   | 1 |           |         |         |         |
| chr13 | 28190671  | 28191329  |   |   |   | + |   | 1 |           | SLC46A3 |         |         |
| chr13 | 34942845  | 34943481  | + |   | + |   |   | 2 |           |         | NBEA    | MAB21L1 |
| chr13 | 34947571  | 34948159  | + |   |   | + |   | 2 |           |         | MAB21L1 |         |
| chr13 | 34950554  | 34951119  | + |   | + | + |   | 3 | MAB21L1   |         | NBEA    |         |
| chr13 | 49595986  | 49600287  | + | + | + |   |   | 3 |           |         |         |         |
| chr13 | 57101588  | 57102323  | + |   | + | + |   | 3 | PCDH17    |         |         |         |
| chr13 | 57104528  | 57106931  | + | + |   | + |   | 3 |           |         | PCDH17  |         |
| chr13 | 66702595  | 66703460  |   |   |   | + |   | 1 | PCDH9     |         |         |         |
| chr13 | 77390427  | 77391383  |   |   | + | + |   | 2 |           | EDNRB   |         |         |
| chr13 | 78068116  | 78069232  | + |   |   |   |   | 1 |           |         |         | POU4F1  |
| chr13 | 78079329  | 78079615  |   |   | + | + |   | 2 | POU4F1    |         |         | C13orf7 |
| chr13 | 78079946  | 78080223  | + |   | + |   |   | 2 | POU4F1    |         |         | C13orf7 |
| chr13 | 80127049  | 80127446  |   |   | + |   |   | 1 |           |         |         |         |
| chr13 | 83351666  | 83351898  |   |   | + | + |   | 2 |           |         | SLITRK1 |         |
| chr13 | 94152191  | 94153185  | + | + | + | + | + | 5 |           |         |         | SOX21   |
| chr13 | 94155591  | 94155884  |   |   |   | + |   | 1 |           |         |         | SOX21   |
| chr13 | 94157643  | 94157875  |   |   |   | + |   | 1 |           |         |         | SOX21   |
| chr13 | 99108206  | 99108447  |   | + |   |   |   | 1 |           |         | CLYBL   |         |
| chr13 | 99345635  | 99346912  |   |   | + |   |   | 1 |           |         |         | CLYBL   |
| chr13 | 99418243  | 99422349  |   |   | + | + | + | 3 | ZIC2      | ZIC5    |         |         |
| chr13 | 99447324  | 99448389  |   | + | + | + |   | 3 |           |         |         |         |
| chr13 | 107317294 | 107319064 |   |   |   | + |   | 1 | LOC728215 |         |         |         |
| chr13 | 111675430 | 111675643 |   |   |   | + |   | 1 |           |         |         |         |
| chr13 | 111755806 | 111756697 |   |   | + | + |   | 2 |           |         |         |         |
| chr13 | 111757886 | 111760666 |   |   | + | + |   | 2 | SOX1      |         |         |         |
| chr13 | 111763361 | 111764235 | + |   | + | + |   | 3 | SOX1      |         |         |         |
| chr13 | 111768566 | 111771583 |   |   | + | + |   | 2 |           | SOX1    |         |         |
| chr13 | 111774283 | 111776420 |   |   |   | + |   | 1 |           |         |         | SOX1    |

|       |           |           |   |   |   |   |   |   |        |        |         |          |
|-------|-----------|-----------|---|---|---|---|---|---|--------|--------|---------|----------|
| chr13 | 111806600 | 111808492 | + |   | + | + |   | 3 |        |        |         |          |
| chr13 | 111808867 | 111809114 |   |   |   | + |   | 1 |        |        |         |          |
| chr13 | 112032968 | 112033734 |   |   |   | + |   | 1 |        |        |         |          |
| chr13 | 112249708 | 112249928 |   |   | + |   |   | 1 |        |        | TUBGCP3 |          |
| chr13 | 112398480 | 112399512 |   |   | + |   |   | 1 |        |        | ATP11A  |          |
| chr13 | 112477179 | 112477394 |   |   | + |   |   | 1 |        |        | ATP11A  |          |
| chr13 | 112512193 | 112512414 |   |   | + |   |   | 1 |        |        | ATP11A  |          |
| chr13 | 112534837 | 112535348 |   |   | + |   |   | 1 |        |        | ATP11A  |          |
| chr13 | 112540488 | 112540837 |   |   | + |   |   | 1 |        |        | ATP11A  |          |
| chr13 | 112545298 | 112545662 |   |   | + |   |   | 1 |        |        | ATP11A  |          |
| chr13 | 112831888 | 112832703 |   |   | + |   |   | 1 |        |        | F10     | F7       |
| chr14 | 20160935  | 20161279  |   |   | + |   |   | 1 |        |        |         |          |
| chr14 | 20170679  | 20170883  |   |   |   | + |   | 1 |        |        |         | OR6S1    |
| chr14 | 20628388  | 20631283  | + |   |   |   |   | 1 |        |        | ZNF219  | FLJ10357 |
| chr14 | 23710894  | 23712060  | + | + | + |   |   | 3 |        | REC8L1 |         | IPO4     |
| chr14 | 23854988  | 23855709  |   | + |   |   |   | 1 | CIDEB  |        | LTB4R   | ADCY4    |
| chr14 | 25744004  | 25744318  |   |   | + |   |   | 1 |        |        |         |          |
| chr14 | 28304641  | 28305659  |   | + | + | + |   | 3 | FOXG1B |        |         |          |
| chr14 | 28313155  | 28313514  | + |   | + | + |   | 3 |        |        |         | FOXG1B   |
| chr14 | 32471846  | 32473830  |   |   | + |   | + | 2 | NPAS3  |        |         |          |
| chr14 | 33338698  | 33340189  |   |   | + | + |   | 2 |        |        | NPAS3   |          |
| chr14 | 36042921  | 36043491  |   |   |   | + |   | 1 |        |        |         |          |
| chr14 | 36044300  | 36045176  |   | + |   |   |   | 1 |        |        |         |          |
| chr14 | 36060625  | 36060960  |   |   |   | + |   | 1 | TITF1  |        |         |          |
| chr14 | 36063240  | 36064239  | + |   |   | + |   | 2 | TITF1  |        |         |          |
| chr14 | 36119085  | 36121477  |   |   | + |   |   | 1 |        |        | NKX2-8  |          |
| chr14 | 36122289  | 36122589  | + | + | + | + |   | 4 | NKX2-8 |        |         |          |
| chr14 | 36185940  | 36187379  |   |   | + |   |   | 1 |        |        |         |          |
| chr14 | 36196538  | 36198025  | + | + |   | + |   | 3 | PAX9   |        |         |          |
| chr14 | 36200933  | 36202536  |   |   | + |   |   | 1 |        |        | PAX9    |          |
| chr14 | 36205265  | 36206099  | + | + | + | + | + | 5 |        |        | PAX9    |          |
| chr14 | 37122397  | 37123917  |   |   |   | + |   | 1 |        |        |         | FOXA1    |
| chr14 | 37137198  | 37138958  | + | + |   |   |   | 2 | FOXA1  |        |         |          |
| chr14 | 37149991  | 37150429  | + |   | + | + |   | 3 |        |        |         |          |
| chr14 | 37161221  | 37161927  |   |   | + |   |   | 1 |        |        |         |          |
| chr14 | 37746906  | 37747538  |   |   | + | + |   | 2 |        | SSTR1  |         |          |

|       |           |           |   |   |   |   |   |  |   |          |         |           |       |
|-------|-----------|-----------|---|---|---|---|---|--|---|----------|---------|-----------|-------|
| chr14 | 37747997  | 37750688  | + |   | + | + | + |  | 4 |          |         | SSTR1     |       |
| chr14 | 51604332  | 51606472  | + |   | + | + |   |  | 3 |          | NID2    | C14orf166 |       |
| chr14 | 54976951  | 54977186  |   |   | + |   |   |  | 1 |          | TBPL2   |           |       |
| chr14 | 56330632  | 56331876  | + | + | + |   |   |  | 3 |          |         |           | OTX2  |
| chr14 | 56344361  | 56346593  | + | + | + | + | + |  | 5 |          |         | OTX2      |       |
| chr14 | 60043526  | 60043876  | + |   | + | + |   |  | 3 | SIX6     |         |           |       |
| chr14 | 60045486  | 60047933  | + | + | + | + | + |  | 5 |          | SIX6    |           |       |
| chr14 | 60173732  | 60174416  | + | + | + | + |   |  | 4 |          |         |           | SIX1  |
| chr14 | 60178708  | 60179539  | + | + | + | + |   |  | 4 |          |         |           | SIX1  |
| chr14 | 64076628  | 64078950  |   |   | + |   |   |  | 1 | C14orf50 | HSPA2   |           | ZBTB1 |
| chr14 | 73775942  | 73777945  |   |   | + |   |   |  | 1 |          |         | CHX10     |       |
| chr14 | 78814907  | 78815812  |   |   |   | + |   |  | 1 |          | NRXN3   |           |       |
| chr14 | 85066248  | 85066711  |   |   |   |   | + |  | 1 |          |         | FLRT2     |       |
| chr14 | 92966490  | 92967219  |   |   |   | + |   |  | 1 |          |         | KIAA1409  |       |
| chr14 | 93323706  | 93325486  | + | + |   |   |   |  | 2 |          | PRIMA1  |           |       |
| chr14 | 94304366  | 94306322  | + | + |   | + |   |  | 3 |          | GSC     |           |       |
| chr14 | 94307376  | 94307964  |   |   | + |   |   |  | 1 | GSC      |         |           |       |
| chr14 | 94309129  | 94309432  | + | + |   | + | + |  | 4 | GSC      |         |           |       |
| chr14 | 94309837  | 94310094  |   |   | + |   |   |  | 1 | GSC      |         |           |       |
| chr14 | 94896429  | 94896694  | + |   |   |   |   |  | 1 |          |         |           |       |
| chr14 | 96569359  | 96569929  | + |   |   |   |   |  | 1 |          |         |           |       |
| chr14 | 98781593  | 98783184  |   | + |   | + |   |  | 2 |          |         | BCL11B    |       |
| chr14 | 100244949 | 100246020 |   | + |   | + |   |  | 2 |          |         |           |       |
| chr14 | 101095743 | 101101320 |   |   |   | + |   |  | 1 |          |         | DIO3      |       |
| chr15 | 21674325  | 21674525  |   |   |   | + |   |  | 1 |          |         |           |       |
| chr15 | 22569268  | 22569626  |   |   | + |   |   |  | 1 |          |         |           |       |
| chr15 | 22674451  | 22674801  | + |   | + |   |   |  | 2 |          |         | SNRPN     |       |
| chr15 | 24795649  | 24796142  | + |   | + |   |   |  | 2 | GABRG3   |         |           |       |
| chr15 | 30796823  | 30798988  | + |   | + | + |   |  | 3 |          | GREM1   |           |       |
| chr15 | 32833736  | 32834772  |   |   | + |   |   |  | 1 |          | CX36    |           |       |
| chr15 | 34959766  | 34960310  |   |   | + |   |   |  | 1 |          |         |           |       |
| chr15 | 35177468  | 35177672  |   |   | + |   |   |  | 1 |          |         | MEIS2     |       |
| chr15 | 35190335  | 35190559  |   |   |   |   | + |  | 1 | MEIS2    |         |           |       |
| chr15 | 39580855  | 39582597  |   | + |   |   |   |  | 1 |          |         | ITPKA     | LTK   |
| chr15 | 50863480  | 50865218  | + |   | + | + |   |  | 3 |          |         | ONECUT1   |       |
| chr15 | 50867751  | 50870991  |   |   | + |   |   |  | 1 |          | ONECUT1 |           |       |



|       |          |          |   |   |   |   |   |   |          |          |         |        |
|-------|----------|----------|---|---|---|---|---|---|----------|----------|---------|--------|
| chr15 | 50873922 | 50874150 | + |   | + | + |   | 3 | ONECUT1  |          |         |        |
| chr15 | 50874504 | 50874780 | + |   |   | + |   | 2 | ONECUT1  |          |         |        |
| chr15 | 56144602 | 56146068 | + |   |   | + | + | 3 |          | ALDH1A2  |         |        |
| chr15 | 58083428 | 58085812 |   | + | + |   |   | 2 |          |          | FOXB1   |        |
| chr15 | 61460942 | 61461213 |   |   |   |   | + | 1 |          | CA12     |         |        |
| chr15 | 62984853 | 62985116 | + |   |   | + |   | 2 | ANKDD1A  |          |         |        |
| chr15 | 65902540 | 65909629 |   | + | + | + | + | 4 |          | LBXCOR1  |         |        |
| chr15 | 67009644 | 67010434 |   |   | + |   |   | 1 |          | SPESP1   |         |        |
| chr15 | 73035331 | 73036975 | + |   |   |   |   | 1 |          | RPP25    |         |        |
| chr15 | 74414579 | 74414893 |   | + |   | + | + | 3 | ISL2     |          |         |        |
| chr15 | 74419318 | 74422570 | + |   |   |   |   | 1 |          |          | ISL2    | ZNF291 |
| chr15 | 74425528 | 74426878 |   |   | + |   |   | 1 |          |          |         | ZNF291 |
| chr15 | 77511155 | 77512698 | + | + | + | + | + | 5 |          | KIAA1024 |         |        |
| chr15 | 87750378 | 87752134 | + | + | + | + | + | 5 |          |          |         |        |
| chr15 | 87753276 | 87754065 | + | + | + | + | + | 5 |          |          |         |        |
| chr15 | 94665886 | 94667791 | + |   |   |   |   | 1 | NR2F2    |          |         |        |
| chr15 | 94674413 | 94678725 |   | + | + |   |   | 2 |          | NR2F2    |         |        |
| chr15 | 94688420 | 94688620 |   |   | + |   |   | 1 |          |          |         | NR2F2  |
| chr15 | 94696311 | 94696733 | + |   |   |   |   | 1 |          |          |         |        |
| chr15 | 94697933 | 94698305 |   |   | + |   |   | 1 |          |          |         |        |
| chr15 | 94712516 | 94712812 |   |   | + | + |   | 2 |          |          |         |        |
| chr15 | 94760346 | 94761535 |   |   | + |   | + | 2 |          |          |         |        |
| chr15 | 95997026 | 95997395 |   |   | + |   |   | 1 |          |          |         |        |
| chr16 | 2956648  | 2960327  | + |   | + | + |   | 3 |          | PAQR4    | KREMEN2 | PKMYT1 |
| chr16 | 3160440  | 3161357  |   |   |   | + |   | 1 |          |          |         |        |
| chr16 | 3182624  | 3182913  |   |   | + |   |   | 1 |          |          |         |        |
| chr16 | 3354966  | 3355168  | + |   | + | + |   | 3 |          |          |         | OR2C1  |
| chr16 | 3433100  | 3433570  |   |   | + |   |   | 1 | FLJ14154 | ZNF597   |         |        |
| chr16 | 7294335  | 7294609  |   |   |   | + |   | 1 |          |          | A2BP1   |        |
| chr16 | 10387188 | 10387755 | + |   |   |   |   | 1 |          |          |         |        |
| chr16 | 12902076 | 12905191 |   |   |   | + |   | 1 |          |          |         |        |
| chr16 | 22732118 | 22733960 |   |   |   | + |   | 1 |          | HS3ST2   |         |        |
| chr16 | 30488729 | 30489035 |   | + |   |   |   | 1 |          |          | ZNF688  |        |
| chr16 | 30960981 | 30961301 | + | + |   | + |   | 3 |          |          |         | STX4A  |
| chr16 | 34152988 | 34153610 |   |   | + |   |   | 1 |          |          |         |        |
| chr16 | 34444219 | 34444625 |   |   | + |   |   | 1 |          |          |         |        |

|       |          |          |   |   |   |   |   |  |   |           |          |          |        |
|-------|----------|----------|---|---|---|---|---|--|---|-----------|----------|----------|--------|
| chr16 | 34517099 | 34517561 |   |   |   | + |   |  | 1 |           |          |          |        |
| chr16 | 34598314 | 34598995 |   |   | + |   |   |  | 1 |           |          |          |        |
| chr16 | 45435302 | 45436067 | + | + |   | + |   |  | 3 |           |          |          |        |
| chr16 | 47866625 | 47866854 |   |   |   | + |   |  | 1 |           |          |          | CBLN1  |
| chr16 | 47868915 | 47869809 |   |   | + | + |   |  | 2 |           |          |          | CBLN1  |
| chr16 | 49432565 | 49432823 | + | + | + | + |   |  | 4 |           |          |          |        |
| chr16 | 49741201 | 49746264 |   |   | + | + |   |  | 2 |           | SALL1    |          |        |
| chr16 | 49747302 | 49747761 |   | + | + | + |   |  | 3 | SALL1     |          |          |        |
| chr16 | 52873104 | 52882105 | + |   | + | + |   |  | 3 |           | IRX3     |          |        |
| chr16 | 52882542 | 52883204 | + |   | + | + |   |  | 3 | IRX3      |          |          |        |
| chr16 | 53527803 | 53530347 | + | + |   | + |   |  | 3 |           |          |          | IRX5   |
| chr16 | 53648119 | 53648448 |   |   |   |   | + |  | 1 |           |          |          |        |
| chr16 | 63712158 | 63715165 |   |   |   | + |   |  | 1 |           | CDH11    |          |        |
| chr16 | 65170251 | 65170913 | + |   |   |   |   |  | 1 |           | CMTM2    | CMTM1    |        |
| chr16 | 65740710 | 65742469 | + |   |   |   |   |  | 1 |           | MGC4655  |          | TRADD  |
| chr16 | 67233952 | 67234344 | + |   |   | + |   |  | 2 | CDH3      |          |          |        |
| chr16 | 69821862 | 69822160 |   |   |   | + |   |  | 1 |           | HYDIN    |          |        |
| chr16 | 85085773 | 85086514 |   |   | + |   |   |  | 1 |           |          |          |        |
| chr16 | 85088249 | 85090495 |   |   | + |   |   |  | 1 |           |          |          |        |
| chr16 | 85156857 | 85160150 |   |   | + |   |   |  | 1 | FOXL1     |          | FOXC2    |        |
| chr16 | 86294154 | 86294408 |   |   | + |   |   |  | 1 |           |          |          | KLHDC4 |
| chr17 | 1053563  | 1054129  |   |   | + |   |   |  | 1 |           |          |          |        |
| chr17 | 4457304  | 4457526  |   |   | + |   |   |  | 1 |           |          | FLJ42461 |        |
| chr17 | 4635369  | 4636303  |   | + | + |   |   |  | 2 | LOC388323 |          | VMO1     | TM4SF5 |
| chr17 | 5343856  | 5345326  | + |   | + |   |   |  | 2 |           |          |          | NLRP1  |
| chr17 | 6738154  | 6738448  |   |   | + |   |   |  | 1 |           |          |          |        |
| chr17 | 8809195  | 8810097  |   |   |   | + |   |  | 1 |           |          |          |        |
| chr17 | 12509393 | 12510060 |   |   |   | + |   |  | 1 | MYOCD     |          |          |        |
| chr17 | 14142452 | 14142777 | + |   | + | + |   |  | 3 | HS3ST3B1  |          |          |        |
| chr17 | 15106522 | 15107231 |   |   |   | + |   |  | 1 |           | PMP22    |          |        |
| chr17 | 15185431 | 15185851 |   |   |   | + |   |  | 1 |           | TEKT3    |          |        |
| chr17 | 15626944 | 15627199 | + |   |   |   |   |  | 1 |           |          |          |        |
| chr17 | 17566331 | 17569225 |   |   | + |   |   |  | 1 |           |          | RAI1     |        |
| chr17 | 23658022 | 23658597 | + |   |   |   |   |  | 1 |           | FLJ40504 |          |        |
| chr17 | 32366013 | 32374988 | + |   | + |   |   |  | 2 | AATF      |          | LHX1     |        |
| chr17 | 32377398 | 32377685 | + |   |   | + |   |  | 2 | AATF      |          |          | LHX1   |

|       |          |          |   |   |   |   |   |   |           |           |          |        |
|-------|----------|----------|---|---|---|---|---|---|-----------|-----------|----------|--------|
| chr17 | 33179448 | 33179696 |   |   |   | + |   | 1 | TCF2      |           |          |        |
| chr17 | 34250975 | 34251187 | + |   |   |   |   | 1 |           | LOC388381 |          | RPL23  |
| chr17 | 34575009 | 34575625 |   |   | + |   |   | 1 |           |           |          | CACNB1 |
| chr17 | 35277672 | 35278163 |   |   | + |   |   | 1 | ZNFN1A3   | ZPBP2     |          |        |
| chr17 | 36272914 | 36273627 |   |   | + |   |   | 1 |           |           | KRT12    |        |
| chr17 | 38089258 | 38089793 |   |   |   | + |   | 1 | CCR10     |           | CNTNAP1  |        |
| chr17 | 38092376 | 38092588 |   |   | + |   |   | 1 | CCR10     |           | CNTNAP1  |        |
| chr17 | 39146637 | 39147002 |   | + |   |   |   | 1 |           |           |          |        |
| chr17 | 42410317 | 42411837 |   |   |   | + |   | 1 |           | RPRML     |          |        |
| chr17 | 43982787 | 43983443 |   | + | + | + | + | 4 | HOXB2     |           | HOXB3    |        |
| chr17 | 44065812 | 44066418 | + |   |   | + |   | 2 | HOXB9     |           |          |        |
| chr17 | 44068926 | 44069130 | + |   |   | + |   | 2 |           |           |          |        |
| chr17 | 44074360 | 44075233 | + | + |   | + |   | 3 |           |           |          |        |
| chr17 | 44151234 | 44152291 | + |   | + |   |   | 2 |           |           |          | PRAC   |
| chr17 | 44155945 | 44156287 | + |   |   |   |   | 1 | PRAC      |           |          | HOXB13 |
| chr17 | 44159203 | 44159414 | + | + |   | + | + | 4 | PRAC      |           | HOXB13   |        |
| chr17 | 44182435 | 44182640 |   |   | + |   |   | 1 |           |           |          |        |
| chr17 | 44187109 | 44187631 |   |   | + |   |   | 1 |           |           |          | TTLL6  |
| chr17 | 45396282 | 45398063 |   |   | + |   |   | 1 | DLX4      |           |          |        |
| chr17 | 45900570 | 45901899 |   |   | + |   |   | 1 | RSAD1     | CHAD      | FLJ20920 |        |
| chr17 | 46213635 | 46213937 | + |   | + |   |   | 2 |           |           |          |        |
| chr17 | 51277734 | 51278138 |   |   |   | + |   | 1 |           |           |          |        |
| chr17 | 56827843 | 56838048 | + | + |   | + | + | 4 | LOC388407 | TBX2      |          | BCAS3  |
| chr17 | 56886506 | 56890036 | + | + | + |   |   | 3 |           | TBX4      |          |        |
| chr17 | 58865386 | 58865618 |   |   | + |   |   | 1 |           |           | CYB561   |        |
| chr17 | 67623575 | 67623903 | + |   | + |   |   | 2 | SOX9      |           |          |        |
| chr17 | 67624420 | 67625866 | + |   |   |   |   | 1 | SOX9      |           |          |        |
| chr17 | 70178791 | 70179305 |   |   |   | + |   | 1 |           | RAB37     |          |        |
| chr17 | 75531280 | 75531511 |   |   | + |   |   | 1 |           |           | TBC1D16  |        |
| chr17 | 76873878 | 76874132 |   |   | + |   |   | 1 |           |           | MGC15523 |        |
| chr17 | 76992125 | 76992465 |   |   |   | + |   | 1 |           |           | BAHCC1   |        |
| chr17 | 77793894 | 77794165 | + |   |   |   |   | 1 |           |           |          | CSNK1D |
| chr17 | 77896736 | 77897004 | + |   |   |   |   | 1 |           |           |          |        |
| chr18 | 894579   | 899574   |   |   | + | + |   | 2 |           | ADCYAP1   |          |        |
| chr18 | 5186244  | 5187389  | + |   | + | + |   | 3 |           |           |          |        |
| chr18 | 5618325  | 5620785  |   |   |   | + |   | 1 |           |           |          |        |

|       |          |          |   |   |   |   |   |   |         |         |         |          |
|-------|----------|----------|---|---|---|---|---|---|---------|---------|---------|----------|
| chr18 | 8357274  | 8357599  |   |   |   | + |   | 1 |         |         | PTPRM   |          |
| chr18 | 9126089  | 9127594  |   | + |   |   |   | 1 |         | ANKRD12 |         | NDUFV2   |
| chr18 | 11138308 | 11139936 |   |   |   | + |   | 1 |         |         |         |          |
| chr18 | 13858533 | 13859026 |   |   |   | + |   | 1 |         |         |         |          |
| chr18 | 15155110 | 15155342 |   |   |   | + |   | 1 |         |         |         |          |
| chr18 | 17998935 | 18006361 | + |   | + | + |   | 3 |         | GATA6   |         |          |
| chr18 | 18393483 | 18394244 |   |   |   |   | + | 1 |         |         |         |          |
| chr18 | 21967727 | 21967951 |   |   |   | + |   | 1 |         | PSMA8   |         |          |
| chr18 | 26875488 | 26877115 |   |   |   | + |   | 1 |         | DSC3    |         |          |
| chr18 | 30056357 | 30057790 |   |   |   | + |   | 1 |         | NOL4    |         |          |
| chr18 | 30810653 | 30811881 |   |   |   | + |   | 1 |         |         |         |          |
| chr18 | 31101283 | 31102128 |   |   |   | + |   | 1 |         |         |         | ZNF397   |
| chr18 | 31783927 | 31784514 |   |   |   | + |   | 1 |         |         |         |          |
| chr18 | 33108246 | 33109161 |   |   |   | + |   | 1 |         |         | BRUNOL4 |          |
| chr18 | 33398906 | 33401626 |   |   |   | + |   | 1 |         | BRUNOL4 |         |          |
| chr18 | 35675459 | 35675827 |   |   |   | + | + | 2 |         |         |         |          |
| chr18 | 41609317 | 41609696 | + |   |   | + |   | 2 |         |         |         |          |
| chr18 | 41671387 | 41673101 | + |   |   |   |   | 1 |         |         | CD33L3  | KIAA1632 |
| chr18 | 42590182 | 42591108 |   |   |   | + |   | 1 |         | ST8SIA5 |         |          |
| chr18 | 42591509 | 42592098 | + |   |   | + |   | 2 | ST8SIA5 |         |         |          |
| chr18 | 42780865 | 42781135 | + |   |   | + | + | 3 |         |         | KATNAL2 |          |
| chr18 | 43031631 | 43032082 |   |   |   | + | + | 2 |         |         |         |          |
| chr18 | 43043741 | 43044676 | + |   |   | + | + | 3 |         |         |         |          |
| chr18 | 45341074 | 45341444 | + |   |   |   |   | 1 | LIPG    |         |         |          |
| chr18 | 45341878 | 45342526 | + |   |   |   |   | 1 |         | LIPG    |         |          |
| chr18 | 45593410 | 45594954 | + |   |   | + |   | 2 |         | ACAA2   |         | MYO5B    |
| chr18 | 46046741 | 46047034 | + |   |   |   |   | 1 |         | CCDC11  |         | MBD1     |
| chr18 | 46048449 | 46048994 | + |   |   | + |   | 2 | CCDC11  |         |         | MBD1     |
| chr18 | 53170706 | 53172603 | + | + | + | + | + | 5 |         | ST8SIA3 |         |          |
| chr18 | 53254153 | 53259851 | + | + | + | + | + | 5 |         |         | ONECUT2 |          |
| chr18 | 55082983 | 55083321 |   |   |   | + | + | 2 |         |         |         | RAX      |
| chr18 | 55085814 | 55087807 |   |   |   | + | + | 2 |         |         | RAX     |          |
| chr18 | 55090605 | 55092520 |   |   |   | + | + | 2 |         | RAX     |         |          |
| chr18 | 57372432 | 57372966 |   |   |   | + |   | 1 |         |         | CDH20   |          |
| chr18 | 68359955 | 68362770 |   |   |   | + |   | 1 |         | CBLN2   |         |          |
| chr18 | 68684946 | 68687851 | + |   |   | + | + | 3 | NETO1   | NETO1   |         |          |

|       |          |          |   |   |   |   |   |   |           |           |          |         |
|-------|----------|----------|---|---|---|---|---|---|-----------|-----------|----------|---------|
| chr18 | 71045096 | 71046221 | + |   |   |   |   | 1 | TSHZ1     |           | ZADH2    |         |
| chr18 | 74775198 | 74775785 |   |   | + |   |   | 1 |           |           |          |         |
| chr18 | 74837994 | 74842232 | + |   | + | + |   | 3 |           | SALL3     |          |         |
| chr19 | 296261   | 296590   | + |   | + |   |   | 2 | KIAA1193  |           |          |         |
| chr19 | 3385930  | 3386417  |   |   | + |   |   | 1 |           |           | NFIC     |         |
| chr19 | 8562789  | 8563917  |   |   | + |   |   | 1 |           |           | ADAMTS10 |         |
| chr19 | 9334590  | 9335001  | + |   | + |   |   | 2 |           | ZNF177    |          |         |
| chr19 | 9469805  | 9470343  | + |   |   | + | + | 3 |           | ZNF560    |          |         |
| chr19 | 9509935  | 9510410  |   |   |   | + |   | 1 |           | ZNF426    |          |         |
| chr19 | 10258604 | 10259703 | + |   |   |   |   | 1 | ICAM5     | ICAM4     |          | ICAM1   |
| chr19 | 12166553 | 12166894 | + |   | + | + |   | 3 |           |           |          | ZNF136  |
| chr19 | 12692794 | 12693225 |   |   | + |   |   | 1 |           |           | TNPO2    | MGC2803 |
| chr19 | 12981987 | 12985368 | + |   |   |   |   | 1 |           |           | NFIX     |         |
| chr19 | 12996318 | 12997169 | + |   |   |   |   | 1 |           |           | NFIX     |         |
| chr19 | 13076245 | 13076543 |   |   | + |   |   | 1 | LYL1      |           |          | TRMT1   |
| chr19 | 18622273 | 18622669 | + |   |   |   |   | 1 |           |           | KLHL26   |         |
| chr19 | 18759229 | 18759449 |   |   | + | + |   | 2 |           |           | COMP     | CRTC1   |
| chr19 | 20023773 | 20024107 |   |   |   | + |   | 1 |           |           |          |         |
| chr19 | 22492237 | 22493101 | + |   | + |   |   | 2 |           |           |          |         |
| chr19 | 33976154 | 33976850 | + |   |   |   |   | 1 |           |           |          |         |
| chr19 | 35408169 | 35411810 |   |   | + | + |   | 2 |           |           |          |         |
| chr19 | 36535721 | 36536023 |   |   | + |   |   | 1 | TSHZ3     |           |          |         |
| chr19 | 39760247 | 39760737 |   |   |   | + |   | 1 |           |           |          |         |
| chr19 | 41176745 | 41177316 |   |   | + |   |   | 1 | LOC644096 |           |          |         |
| chr19 | 41427862 | 41428724 | + | + | + | + |   | 4 |           |           |          | ZNF146  |
| chr19 | 41604101 | 41604721 | + |   | + |   |   | 2 | ZNF545    |           |          |         |
| chr19 | 41958435 | 41958867 | + |   |   |   |   | 1 |           |           |          |         |
| chr19 | 41980183 | 41980563 | + |   |   |   |   | 1 |           |           |          |         |
| chr19 | 42020737 | 42021358 |   |   |   | + |   | 1 |           | ZNF790    |          |         |
| chr19 | 42155832 | 42156446 | + |   | + | + |   | 3 |           |           |          |         |
| chr19 | 42434579 | 42434869 | + |   |   |   |   | 1 |           |           |          | ZNF383  |
| chr19 | 42516942 | 42517596 |   |   | + |   |   | 1 |           | HKR1      |          |         |
| chr19 | 42586184 | 42586705 |   |   | + |   |   | 1 |           |           |          | ZNF569  |
| chr19 | 42689631 | 42689965 |   |   | + |   |   | 1 |           | LOC390927 |          |         |
| chr19 | 42874634 | 42875167 | + |   |   | + |   | 2 |           | FLJ37549  |          | ZNF607  |
| chr19 | 42901948 | 42902532 |   |   |   | + |   | 1 |           | ZNF607    |          |         |

|       |           |          |   |   |   |   |   |   |       |        |           |          |
|-------|-----------|----------|---|---|---|---|---|---|-------|--------|-----------|----------|
| chr19 | 42972931  | 42973264 |   |   | + |   |   | 1 |       |        |           |          |
| chr19 | 42999719  | 43000366 | + |   |   | + |   | 2 |       |        |           |          |
| chr19 | 43037649  | 43038000 | + |   | + |   |   | 2 |       |        |           |          |
| chr19 | 48697733  | 48698273 | + |   |   |   |   | 1 |       |        | PHLDB3    | ETHE1    |
| chr19 | 49097658  | 49097893 |   |   |   | + |   | 1 |       |        |           |          |
| chr19 | 49644257  | 49644649 | + |   | + |   |   | 2 |       | ZNF229 |           |          |
| chr19 | 50286238  | 50286847 |   |   | + |   |   | 1 |       |        | GEMIN7    |          |
| chr19 | 53675375  | 53675987 |   |   | + |   |   | 1 |       |        |           | LMTK3    |
| chr19 | 53824416  | 53826103 | + |   |   |   |   | 1 |       |        | DBP       | CA11     |
| chr19 | 54405308  | 54405931 | + |   | + |   |   | 2 |       |        | TRPM4     |          |
| chr19 | 55245825  | 55246304 | + |   |   | + |   | 2 |       |        | FLJ26850  | ZNF473   |
| chr19 | 55552659  | 55553075 |   |   | + |   |   | 1 |       |        |           | NAPSA    |
| chr19 | 55553586  | 55553895 |   |   | + |   |   | 1 |       |        | NAPSA     |          |
| chr19 | 55923445  | 55923781 | + | + |   | + |   | 3 |       |        |           | CLEC11A  |
| chr19 | 57082654  | 57083180 | + | + |   | + | + | 4 |       | ZNF577 |           | ZNF649   |
| chr19 | 57144129  | 57144355 | + |   | + | + | + | 4 |       |        |           | ZNF613   |
| chr19 | 57564897  | 57565384 |   |   |   | + |   | 1 |       |        |           | ZNF610   |
| chr19 | 57592768  | 57592970 |   |   | + |   |   | 1 |       | ZNF528 |           |          |
| chr19 | 58232548  | 58233045 |   |   | + |   |   | 1 |       |        |           |          |
| chr19 | 58253028  | 58253624 |   |   | + |   |   | 1 |       |        |           | ZNF160   |
| chr19 | 58354002  | 58354312 |   |   |   | + |   | 1 |       | ZNF347 |           | ZNF665   |
| chr19 | 58503433  | 58503823 | + |   | + | + |   | 3 |       |        |           |          |
| chr19 | 59174834  | 59175384 | + |   |   | + |   | 2 |       |        | CACNG8    |          |
| chr19 | 59359971  | 59360378 |   |   | + |   |   | 1 | LENG1 |        | TMC4      | LENG4    |
| chr19 | 60283718  | 60285792 | + | + | + | + |   | 4 |       |        | EPS8L1    | PPP1R12C |
| chr19 | 60907042  | 60907388 | + |   | + |   |   | 2 |       |        |           | NALP9    |
| chr19 | 61289851  | 61292108 | + |   |   |   |   | 1 |       |        | LOC126208 |          |
| chr19 | 61571230  | 61571807 | + |   |   | + |   | 2 |       |        |           |          |
| chr19 | 61607169  | 61607668 | + |   |   | + |   | 2 |       | ZNF583 |           |          |
| chr19 | 61680126  | 61681553 | + |   |   |   |   | 1 |       | ZNF667 |           |          |
| chr19 | 617110556 | 61711318 | + |   |   |   |   | 1 |       | ZNF471 |           |          |
| chr19 | 61968427  | 61968754 | + |   | + | + |   | 3 |       |        |           | ZIM2     |
| chr19 | 62302501  | 62302749 | + |   | + | + |   | 3 |       |        |           |          |
| chr19 | 62309414  | 62310260 | + |   | + |   |   | 2 |       |        |           |          |
| chr19 | 62322152  | 62322445 |   |   | + |   |   | 1 | USP29 |        |           |          |
| chr19 | 62730385  | 62731020 |   |   |   | + |   | 1 |       | ZNF549 |           |          |

|       |          |          |   |   |   |   |   |   |           |           |           |          |
|-------|----------|----------|---|---|---|---|---|---|-----------|-----------|-----------|----------|
| chr19 | 62786552 | 62787576 | + |   | + | + |   | 3 | ZNF416    | ZIK1      |           |          |
| chr19 | 62817343 | 62817714 |   |   |   | + |   | 1 |           | ZNF134    |           | ZNF530   |
| chr19 | 62836152 | 62836811 |   |   |   | + |   | 1 |           | ZNF211    |           | ZNF134   |
| chr19 | 62885081 | 62885450 |   |   |   | + |   | 1 |           | ZNF551    |           | ZSCAN4   |
| chr19 | 62911911 | 62912329 | + | + |   |   |   | 2 |           |           | ZNF154    |          |
| chr19 | 62930398 | 62930840 | + |   | + |   |   | 2 |           | ZNF671    |           |          |
| chr19 | 62949901 | 62950431 |   |   |   | + |   | 1 | FLJ38288  |           |           |          |
| chr19 | 63091758 | 63092088 | + |   | + |   |   | 2 |           |           |           |          |
| chr19 | 63138149 | 63138612 | + |   |   |   |   | 1 |           | ZNF418    |           | ZNF256   |
| chr19 | 63212567 | 63213036 |   |   |   | + |   | 1 | ZNF606    |           |           |          |
| chr19 | 63246167 | 63246399 |   |   |   | + |   | 1 |           |           | ZSCAN1    |          |
| chr19 | 63262206 | 63263591 | + |   | + |   |   | 2 |           | ZNF135    |           | ZSCAN1   |
| chr19 | 63321122 | 63322053 | + |   | + |   |   | 2 |           |           |           | ZNF329   |
| chr19 | 63353550 | 63354099 | + |   | + |   |   | 2 |           | ZNF329    |           |          |
| chr19 | 63357836 | 63358645 | + |   |   |   |   | 1 | ZNF329    |           |           |          |
| chr19 | 63386314 | 63386919 | + |   |   |   |   | 1 |           |           | ZNF274    |          |
| chr19 | 63407033 | 63407845 | + | + | + |   |   | 3 |           |           | ZNF274    |          |
| chr19 | 63420090 | 63420541 | + |   | + | + |   | 3 |           |           |           | ZNF274   |
| chr19 | 63559210 | 63560680 | + | + |   | + |   | 3 | A1BG      |           | ZNF497    |          |
| chr20 | 773268   | 774276   |   |   |   | + |   | 1 |           | C20orf55  | C20orf55  |          |
| chr20 | 1731825  | 1732552  |   |   |   | + |   | 1 |           |           |           |          |
| chr20 | 9435112  | 9435889  | + |   | + | + | + | 4 | C20orf103 |           |           |          |
| chr20 | 9443254  | 9443597  |   |   |   | + |   | 1 |           | C20orf103 |           |          |
| chr20 | 9444472  | 9444893  |   |   |   | + | + | 3 |           |           | C20orf103 |          |
| chr20 | 17154529 | 17154952 |   |   |   | + |   | 1 | PCSK2     |           |           |          |
| chr20 | 18433171 | 18433580 |   |   |   | + |   | 1 | SEC23B    |           |           |          |
| chr20 | 20292401 | 20298605 | + | + | + | + |   | 4 |           | INSM1     |           | C20orf26 |
| chr20 | 20381106 | 20381329 |   |   |   | + |   | 1 |           |           | C20orf74  |          |
| chr20 | 20948766 | 20949280 |   |   |   | + | + | 2 |           |           |           |          |
| chr20 | 21028930 | 21030824 |   |   |   | + | + | 3 |           |           |           |          |
| chr20 | 21320042 | 21320463 | + | + |   | + |   | 3 |           |           |           | XRN2     |
| chr20 | 21433933 | 21444714 | + |   |   | + | + | 3 |           | NKX2-2    |           |          |
| chr20 | 21637759 | 21638048 |   |   |   | + | + | 2 |           |           | PAX1      |          |
| chr20 | 22496968 | 22497720 |   |   |   | + |   | 1 |           |           |           |          |
| chr20 | 22505518 | 22507240 | + |   | + | + | + | 4 |           |           |           | FOXA2    |
| chr20 | 22507554 | 22508001 |   |   |   | + |   | 1 |           |           |           | FOXA2    |

|       |          |          |   |   |   |   |   |   |         |         |        |        |
|-------|----------|----------|---|---|---|---|---|---|---------|---------|--------|--------|
| chr20 | 22510737 | 22514104 |   |   |   | + |   | 1 |         | FOXA2   |        |        |
| chr20 | 22514822 | 22515055 |   |   |   | + |   | 1 | FOXA2   |         |        |        |
| chr20 | 25011839 | 25013525 | + |   | + | + | + | 4 | VSX1    |         |        |        |
| chr20 | 29659780 | 29660246 |   | + |   |   |   | 1 |         |         |        | ID1    |
| chr20 | 33652134 | 33653681 |   |   | + |   |   | 1 |         |         |        |        |
| chr20 | 36785545 | 36790786 | + | + | + | + |   | 4 |         | SLC32A1 |        |        |
| chr20 | 38749965 | 38753401 | + | + | + | + |   | 4 |         | MAFB    |        |        |
| chr20 | 43366327 | 43366814 | + |   |   |   |   | 1 | RBPSUHL |         | MATN4  |        |
| chr20 | 44713189 | 44713576 |   |   | + |   |   | 1 |         | SLC13A3 |        |        |
| chr20 | 47368247 | 47369091 |   |   |   | + |   | 1 |         |         |        |        |
| chr20 | 54012011 | 54014085 | + | + | + | + | + | 5 |         | CBLN4   |        |        |
| chr20 | 54633687 | 54640196 |   | + | + | + |   | 3 |         | TFAP2C  |        |        |
| chr21 | 25856295 | 25856676 |   |   | + |   |   | 1 |         |         |        |        |
| chr21 | 26866882 | 26867517 |   |   | + |   |   | 1 |         | CYYR1   |        |        |
| chr21 | 27259728 | 27262108 |   |   | + |   |   | 1 |         | ADAMTS5 |        |        |
| chr21 | 30233258 | 30233977 |   |   | + | + | + | 3 |         |         | GRIK1  |        |
| chr21 | 33364077 | 33366413 |   |   |   | + |   | 1 |         | OLIG1   |        |        |
| chr21 | 34963176 | 34965094 | + | + |   |   |   | 2 |         | CLIC6   |        |        |
| chr21 | 35320831 | 35321129 | + | + | + | + |   | 4 |         |         | RUNX1  |        |
| chr21 | 36987050 | 36988055 |   |   | + | + |   | 2 | SIM2    |         |        |        |
| chr21 | 36990064 | 36995761 | + | + | + | + | + | 5 |         | SIM2    |        |        |
| chr21 | 36998633 | 36999555 | + |   |   |   |   | 1 |         |         | SIM2   |        |
| chr21 | 37001812 | 37003703 |   |   |   | + |   | 1 |         |         | SIM2   |        |
| chr21 | 37041664 | 37042612 | + |   |   | + |   | 2 |         |         | SIM2   | HLCS   |
| chr22 | 16911216 | 16911504 | + |   |   |   |   | 1 |         |         |        |        |
| chr22 | 19113467 | 19116201 |   |   | + |   |   | 1 |         |         | SCARF2 | KLHL22 |
| chr22 | 28039282 | 28042013 |   |   | + |   |   | 1 |         | RRP22   |        | GAS2L1 |
| chr22 | 28196327 | 28196652 |   |   |   | + |   | 1 | NEFH    |         |        |        |
| chr22 | 44655030 | 44655728 |   | + |   | + | + | 3 |         |         |        |        |
| chrX  | 6154121  | 6155906  |   |   |   | + |   | 1 |         | NLGN4X  |        |        |
| chrX  | 10548200 | 10548486 | + |   |   | + |   | 2 |         | MID1    |        |        |
| chrX  | 12511404 | 12511753 |   |   |   | + |   | 1 |         |         | FRMPD4 |        |
| chrX  | 12903029 | 12904520 | + |   |   | + |   | 2 |         | TMSB4X  |        |        |
| chrX  | 15263291 | 15263929 |   |   |   | + |   | 1 |         | PIGA    |        | FIGF   |
| chrX  | 15421233 | 15421606 |   |   |   | + |   | 1 | BMX     | PIR     |        |        |
| chrX  | 17583307 | 17584404 | + |   | + |   |   | 2 |         |         | NHS    |        |



|      |           |           |   |   |   |  |   |        |              |         |         |
|------|-----------|-----------|---|---|---|--|---|--------|--------------|---------|---------|
| chrX | 18603074  | 18603520  | + |   | + |  | 2 | RS1    |              |         |         |
| chrX | 20194049  | 20196732  |   |   | + |  | 1 |        | RPS6KA3      |         |         |
| chrX | 21583940  | 21586987  |   |   | + |  | 1 |        | RP11-450P7.3 |         | CNKSR2  |
| chrX | 23260206  | 23260517  |   |   | + |  | 1 | PTCHD1 |              |         |         |
| chrX | 23261064  | 23263560  |   |   | + |  | 1 |        | PTCHD1       |         |         |
| chrX | 23710977  | 23711645  |   |   | + |  | 1 |        | SAT          |         |         |
| chrX | 24930159  | 24934128  |   |   | + |  | 1 |        |              | ARX     | POLA    |
| chrX | 24943586  | 24944633  |   | + | + |  | 2 |        | ARX          |         |         |
| chrX | 38906607  | 38907075  |   |   | + |  | 1 |        |              |         |         |
| chrX | 39357742  | 39358237  |   |   | + |  | 1 |        |              |         |         |
| chrX | 39749470  | 39754050  | + |   | + |  | 2 |        |              |         |         |
| chrX | 39756477  | 39759710  | + |   | + |  | 2 |        |              |         |         |
| chrX | 39838379  | 39854191  | + |   | + |  | 2 |        | BCOR         |         |         |
| chrX | 39889985  | 39892010  | + |   | + |  | 2 |        |              |         |         |
| chrX | 39895864  | 39901147  |   |   | + |  | 1 |        |              |         |         |
| chrX | 39911537  | 39913320  |   |   | + |  | 1 |        |              |         |         |
| chrX | 39915763  | 39917125  | + |   |   |  | 1 |        |              |         |         |
| chrX | 40367319  | 40368157  |   |   | + |  | 1 |        |              |         | CXorf38 |
| chrX | 42521953  | 42522327  |   |   | + |  | 1 |        |              |         |         |
| chrX | 48569782  | 48571008  |   | + |   |  | 1 | ERAS   |              |         | HDAC6   |
| chrX | 48639445  | 48640273  |   |   | + |  | 1 |        | PQBP1        | TIMM17B |         |
| chrX | 53046434  | 53046818  |   | + |   |  | 1 |        |              |         |         |
| chrX | 64171134  | 64172016  |   |   | + |  | 1 |        |              |         |         |
| chrX | 67569672  | 67570632  |   |   | + |  | 1 |        | OPHN1        |         |         |
| chrX | 67635153  | 67635796  |   |   | + |  | 1 |        | YIPF6        |         |         |
| chrX | 68301639  | 68302129  |   |   | + |  | 1 |        | PJA1         |         |         |
| chrX | 73672371  | 73673509  |   |   | + |  | 1 |        |              |         | SLC16A2 |
| chrX | 82652099  | 82652432  |   | + | + |  | 2 |        |              |         | POU3F4  |
| chrX | 90576259  | 90576775  |   |   | + |  | 1 |        |              | PABPC5  |         |
| chrX | 99548310  | 99552014  |   | + |   |  | 1 |        | PCDH19       |         |         |
| chrX | 99552788  | 99553037  |   | + |   |  | 1 | PCDH19 |              |         |         |
| chrX | 99777956  | 99778450  | + |   | + |  | 2 | SRPX2  | TSPAN6       |         |         |
| chrX | 100332897 | 100333393 |   | + | + |  | 2 |        |              |         |         |
| chrX | 103103797 | 103104369 |   |   | + |  | 1 |        | MGC39900     |         |         |
| chrX | 107065887 | 107066288 |   | + |   |  | 1 |        |              |         | MID2    |

|              |           |                 |   |   |   |   |   |  |   |            |            |            |            |
|--------------|-----------|-----------------|---|---|---|---|---|--|---|------------|------------|------------|------------|
| chrX         | 110226021 | 110226335       |   |   |   | + |   |  | 1 |            | PAK3       |            |            |
| chrX         | 111970221 | 111971471       |   |   |   | + |   |  | 1 |            | AMOT       |            |            |
| chrX         | 113722346 | 113722665       | + |   |   | + |   |  | 2 | HTR2C      |            |            |            |
| chrX         | 113724776 | 113725709       | + |   |   | + |   |  | 2 |            | HTR2C      |            |            |
| chrX         | 118809186 | 118810157       |   |   |   | + |   |  | 1 |            | RPL39      |            |            |
| chrX         | 130019813 | 130020416       |   |   |   | + |   |  | 1 |            | FLJ30058   |            |            |
| chrX         | 133133345 | 133134602       |   |   |   | + |   |  | 1 |            |            |            |            |
| chrX         | 133510841 | 133513129       | + |   | + |   |   |  | 2 |            |            |            |            |
| chrX         | 134257297 | 134257520       | + |   | + | + |   |  | 3 |            |            | ZNF75      |            |
| chrX         | 135943493 | 135943941       |   |   |   | + |   |  | 1 | GPR101     |            |            |            |
| chrX         | 136457211 | 136457969       |   |   |   | + | + |  | 2 |            |            |            |            |
| chrX         | 136459743 | 136460985       | + | + | + | + | + |  | 5 |            |            |            |            |
| chrX         | 138104494 | 138104835       |   |   |   | + |   |  | 1 |            |            |            |            |
| chrX         | 139420772 | 139421248       |   |   |   | + |   |  | 1 | SOX3       |            |            |            |
| chrX         | 149817451 | 149818830       |   |   |   | + |   |  | 1 |            | CD99L2     |            |            |
| chrX         | 150093806 | 150094927       |   |   |   | + |   |  | 1 | GPR50      |            |            |            |
| chrX         | 152872013 | 152872366       |   |   |   | + |   |  | 1 | RENBP      |            | HCFC1      |            |
| chrX         | 152872826 | 152873834       |   |   |   | + |   |  | 1 | RENBP      |            | HCFC1      |            |
| chrX         | 152889266 | 152891674       |   |   |   | + |   |  | 1 |            | TMEM187    |            |            |
| chrY         | 238669    | 239872          |   |   |   | + |   |  | 1 |            |            | PPP2R3B    |            |
| chrY         | 499674    | 501262          | + |   |   | + |   |  | 2 | SHOX       |            |            |            |
| chrY         | 512624    | 512973          |   |   |   | + |   |  | 1 |            |            | SHOX       |            |
| chrY         | 514728    | 515677          | + |   | + | + |   |  | 3 |            |            | SHOX       |            |
| chrY         | 4927957   | 4928586         |   |   |   | + |   |  | 1 |            | PCDH11Y    |            |            |
| chrY         | 4930745   | 4931225         |   |   |   | + | + |  | 2 |            |            | PCDH11Y    |            |
| chrY         | 12587837  | 12588044        | + |   |   |   |   |  | 1 |            |            |            |            |
| <b>Total</b> |           | <b>1496 CGI</b> |   |   |   |   |   |  |   | <b>295</b> | <b>324</b> | <b>429</b> | <b>261</b> |

\* Locations of the CpG islands (CGIs) relative to known genes are defined as: Promoter, overlapping any first exon/transcription start site (TSS) of a gene; Upstream, from -10 kb to the TSS except those overlapping with first exon/TSS; Intragenic, from TSS to the end of the gene boundary excluding those overlapping with first exon/TSS; Downstream, from the end of the gene to 10 kb downstream.
