# Supplementary material
Source: PubMed Central journal article supplement (PMC2224196)
Supplement: pnas_0710735105_10.pdf [file pnas_0710735105_10.pdf]

Table 5. Partial list of hypermethylated CpG islands as candidate markers for stage I lung squamous cell carcinoma \*

| Location in hg18 |           |           | Position relative to known genes |          |            |            |
|------------------|-----------|-----------|----------------------------------|----------|------------|------------|
| Chr              | Start     | End       | Upstream                         | Promoter | Intragenic | Downstream |
| chr1             | 47682300  | 47683607  |                                  |          |            | FOXD2      |
| chr1             | 63554983  | 63563059  |                                  |          | FOXD3      |            |
| chr1†            | 90955098  | 90955445  |                                  | BARHL2   |            |            |
| chr1             | 90963078  | 90965392  | BARHL2                           |          |            |            |
| chr1             | 110411789 | 110414826 |                                  |          | ALX3       |            |
| chr1             | 119350668 | 119352843 |                                  |          |            |            |
| chr2†            | 19419271  | 19421884  |                                  | OSR1     |            |            |
| chr2             | 20733488  | 20734761  |                                  |          | GDF7       |            |
| chr2             | 24251150  | 24251698  |                                  | FLJ30851 |            |            |
| chr2†            | 63134539  | 63134851  |                                  |          | OTX1       | EHBP1      |
| chr2†            | 66525936  | 66527140  |                                  |          | MEIS1      |            |
| chr2             | 66662073  | 66662908  |                                  |          |            | MEIS1      |
| chr2             | 80383189  | 80384357  |                                  |          | LRRTM1     |            |
| chr2†            | 176652334 | 176656692 | HOXD13                           |          | EVX2       |            |
| chr2             | 176672309 | 176673755 | HOXD11                           |          | HOXD12     | HOXD13     |
| chr2             | 176689012 | 176689669 | HOXD10                           |          |            | HOXD11     |
| chr2             | 176690354 | 176690648 | HOXD9                            |          | HOXD10     | HOXD11     |
| chr2             | 176694671 | 176696537 | HOXD8                            | HOXD9    |            | HOXD10     |
| chr2             | 176737660 | 176738187 |                                  |          | HOXD3      |            |
| chr3             | 148591199 | 148594390 |                                  |          | ZIC4       |            |
| chr4             | 1386292   | 1391730   |                                  |          |            | FLJ34443   |
| chr4†            | 4910534   | 4911092   | MSX1                             |          |            |            |
| chr4             | 174686622 | 174688044 |                                  | HAND2    |            |            |
| chr5†            | 2791954   | 2794237   |                                  |          |            | IRX2       |
| chr5             | 3647468   | 3656054   |                                  |          | IRX1       |            |
| chr5             | 54554812  | 54555385  |                                  |          |            | UNG2       |
| chr5             | 72629904  | 72631564  |                                  |          |            |            |
| chr5             | 140790679 | 140792801 |                                  | PCDHGA12 |            |            |
| chr6             | 10489545  | 10490340  |                                  |          |            |            |
| chr6†            | 10498025  | 10498551  |                                  |          |            | TFAP2A     |
| chr6             | 10530308  | 10530634  | TFAP2A                           |          |            | MGC40222   |
| chr6             | 101953488 | 101953856 |                                  | GRIK2    |            |            |
| chr6†            | 108592365 | 108597232 |                                  | NR2E1    |            |            |
| chr7†            | 27170441  | 27172987  | HOXA7                            | HOXA9    |            | HOXA10     |
| chr7             | 27219207  | 27220360  |                                  |          |            |            |
| chr7             | 121743780 | 121744577 |                                  |          |            | CADPS2     |
| chr7             | 153214251 | 153216599 |                                  | DPP6     |            |            |
| chr7             | 154857319 | 154860615 |                                  |          |            |            |
| chr8             | 100054910 | 100056159 |                                  |          |            |            |
| chr9             | 959530    | 963276    | DMRT3                            |          |            | DMRT1      |
| chr9             | 125813068 | 125820774 |                                  | LHX2     |            |            |
| chr10            | 94170296  | 94170734  |                                  |          |            |            |

|        |           |           |       |          |         |       |
|--------|-----------|-----------|-------|----------|---------|-------|
| chr10  | 118882152 | 118882629 |       |          | VAX1    |       |
| chr12  | 52726910  | 52727810  | HOXC4 |          | HOXC4   |       |
| chr12  | 60871036  | 60872535  |       |          | FAM19A2 |       |
| chr13  | 94152191  | 94153185  |       |          |         | SOX21 |
| chr14  | 36205265  | 36206099  |       |          | PAX9    |       |
| chr14  | 56344361  | 56346593  |       |          | OTX2    |       |
| chr14  | 60045486  | 60047933  |       | SIX6     |         |       |
| chr15  | 77511155  | 77512698  |       | KIAA1024 |         |       |
| chr15  | 87750378  | 87752134  |       |          |         |       |
| chr15  | 87753276  | 87754065  |       |          |         |       |
| chr18  | 53170706  | 53172603  |       | ST8SIA3  |         |       |
| chr18† | 53254153  | 53259851  |       |          | ONECUT2 |       |
| chr20  | 54012011  | 54014085  |       | CBLN4    |         |       |
| chr21  | 36990064  | 36995761  |       | SIM2     |         |       |
| chrX   | 136459743 | 136460985 |       |          |         |       |

\* These CpG islands were methylated in all five stage I SCCs according to the Agilent CpG island microarray data.

† Methylation status of these CpG islands was verified by COBRA assays.
