# Supplementary material
Source: PubMed Central journal article supplement (PMC2224196)

# Chromosome 8

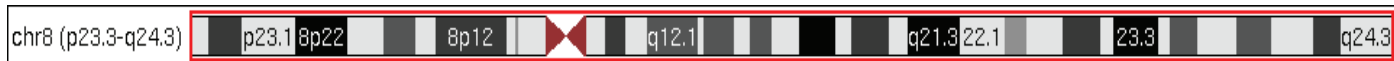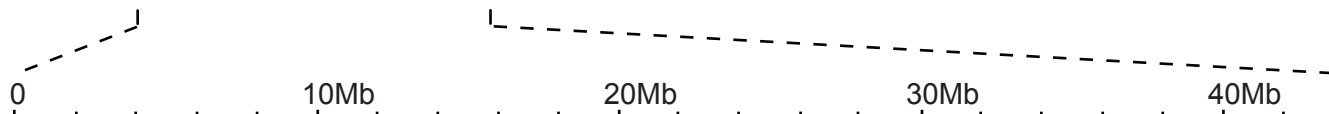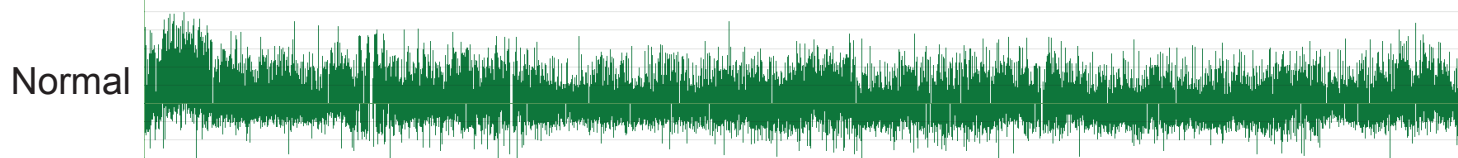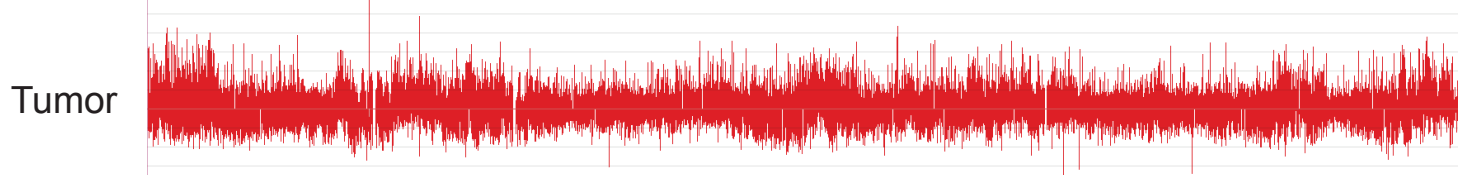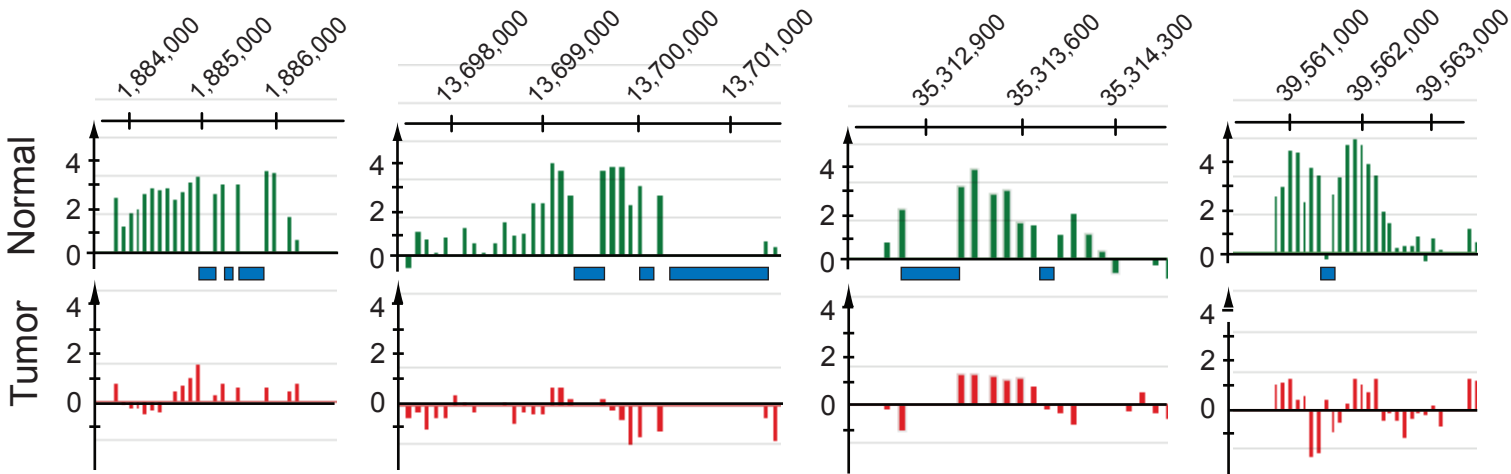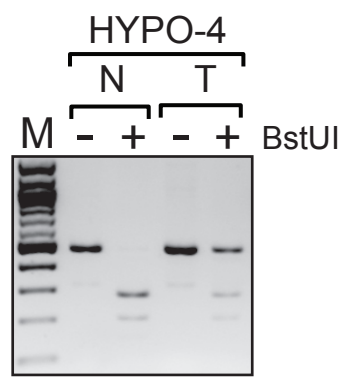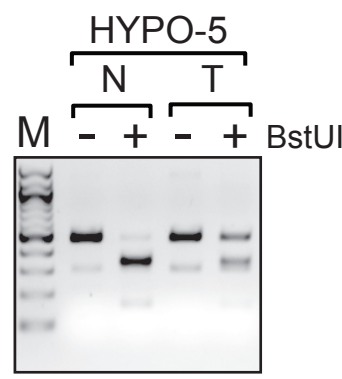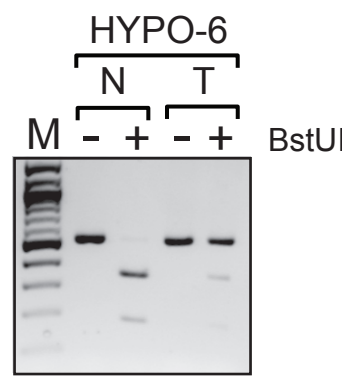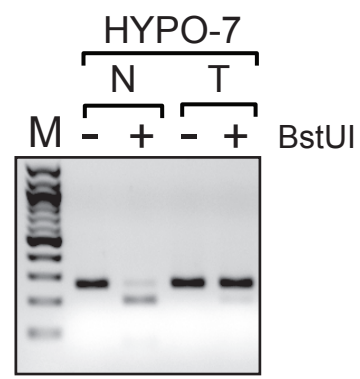

Supplement: pnas_0710735105_2.pdf [file pnas_0710735105_2.pdf]

# Chromosome 8

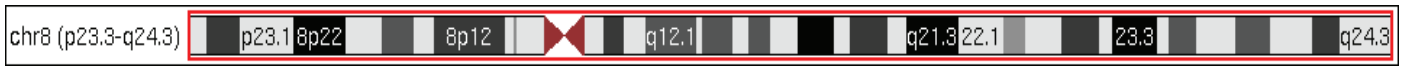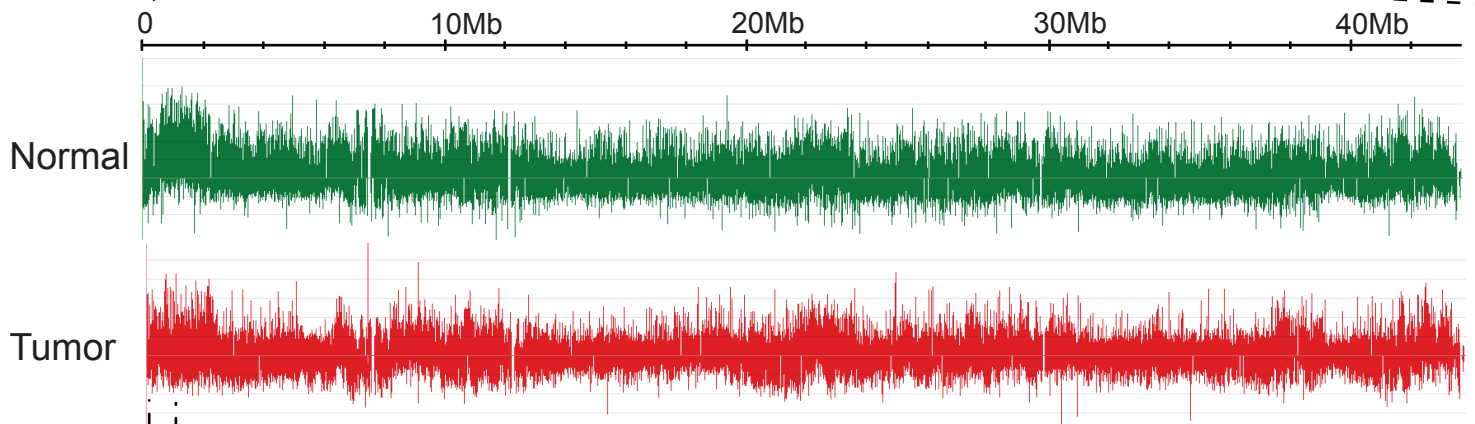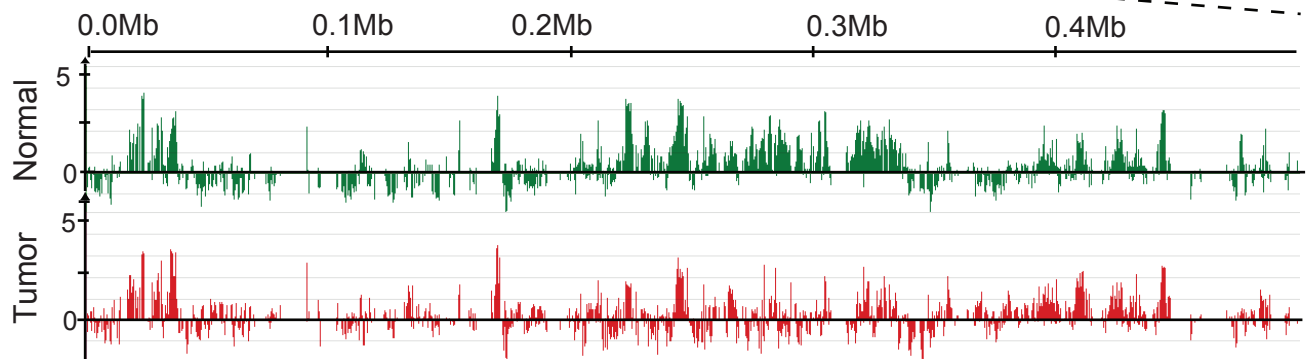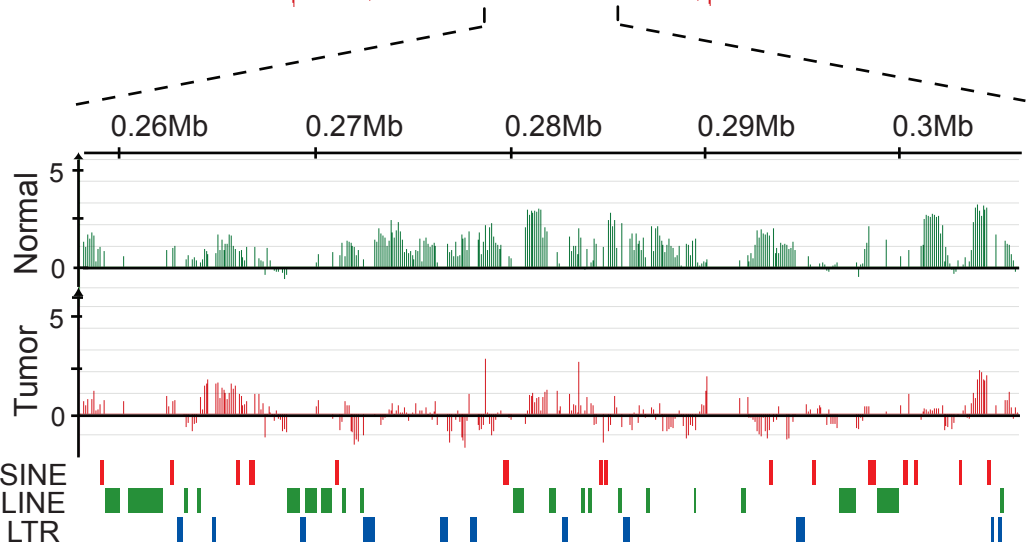

Supplement: pnas_0710735105_3.pdf [file pnas_0710735105_3.pdf]

# Chromosome 8

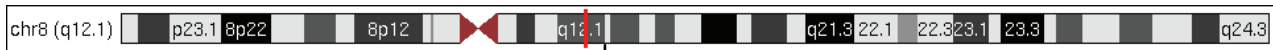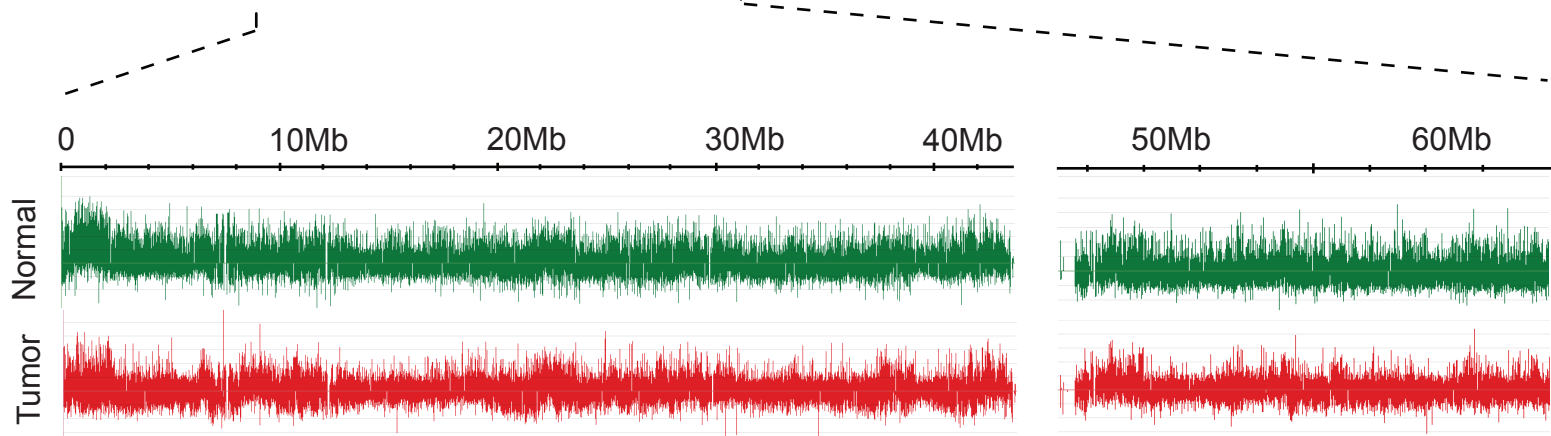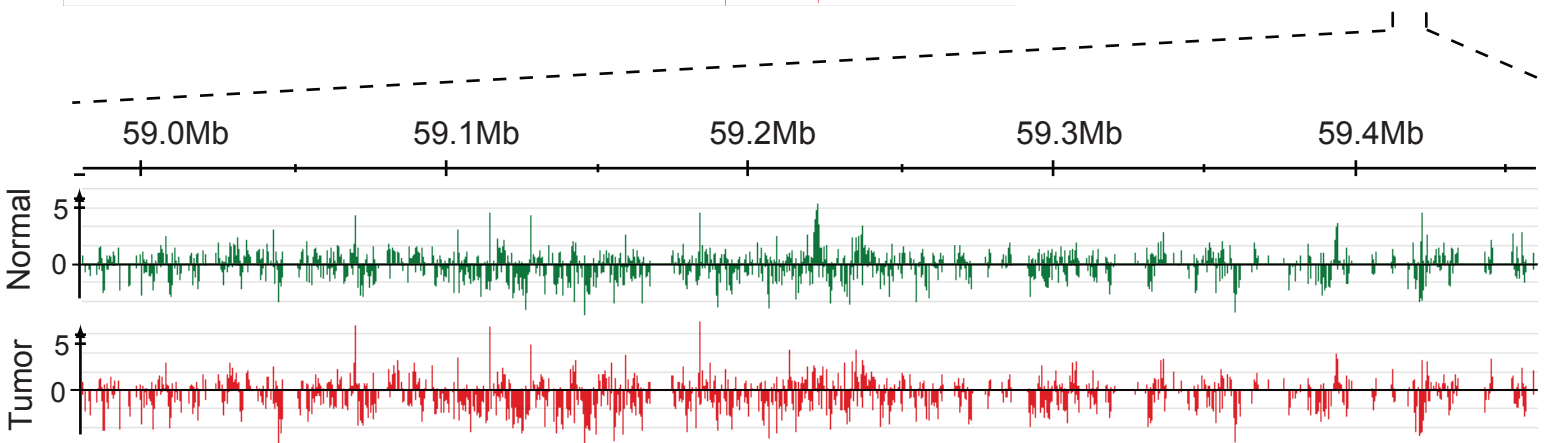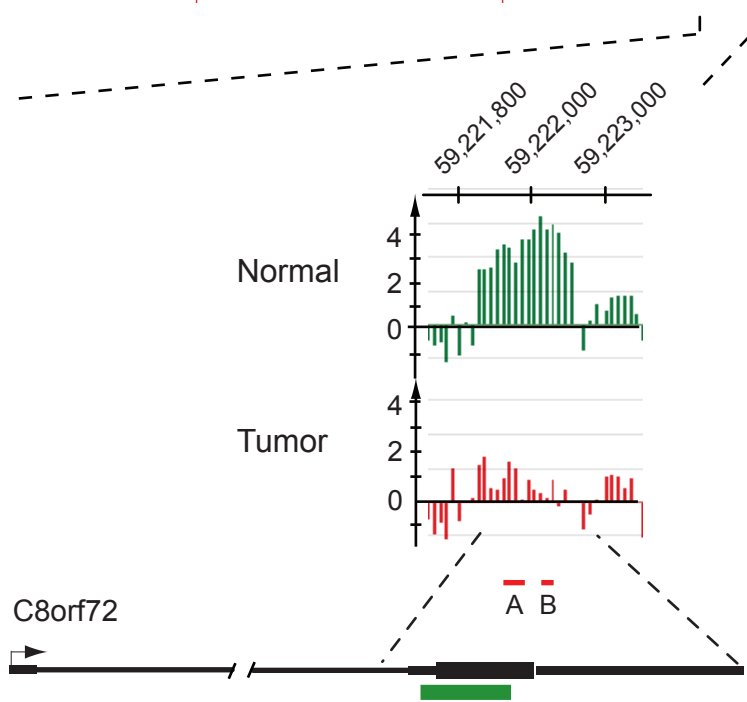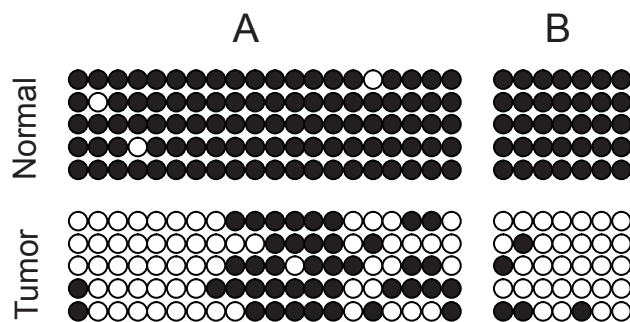

Supplement: pnas_0710735105_4.pdf [file pnas_0710735105_4.pdf]

# A

Leukocyte DNA

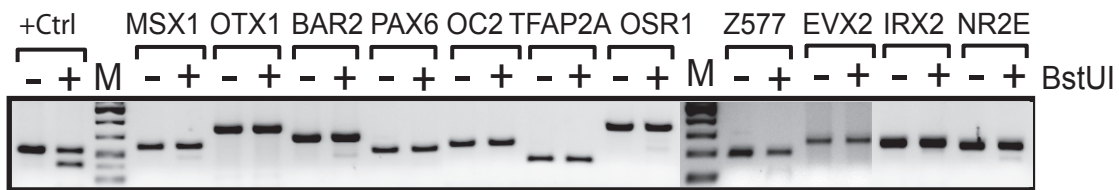

Non-cancerous lung DNA

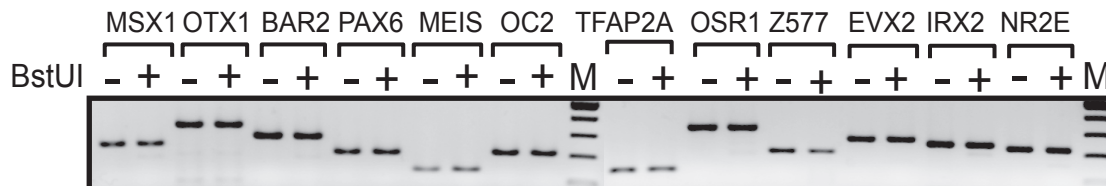

# B

TUMOR

LUNG

LEUKOCYTES

OTX1

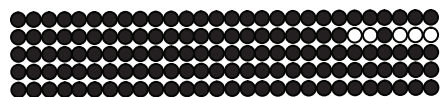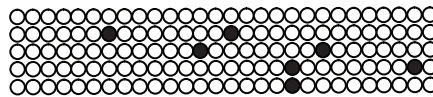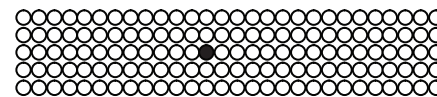

PAX6

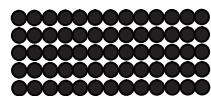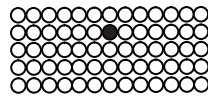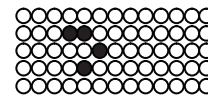

IRX2

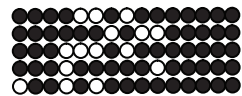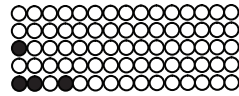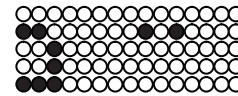

EVX2

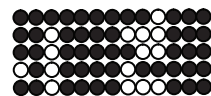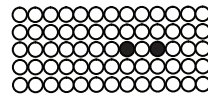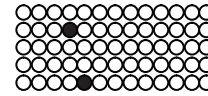

OC2

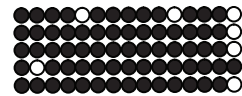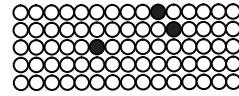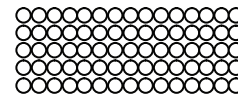

TFAP2A

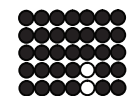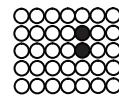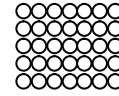

Supplement: pnas_0710735105_7.pdf [file pnas_0710735105_7.pdf]
